# Supplementary material for: The landscape of antisense gene expression in human cancers
Source: HighWire-hosted journal article supplement (doi:10.1101/gr.180596.114), 2015-06-10
Supplement: AMC_SAS_Supplemental_Data_v25.xlsx [file AMC_SAS_Supplemental_Data_v25.xlsx]

## Sheet: DataS1_ssRNAseq_Cohort
# Supplementary DataS1: Detailed Description of the ssRNASeq MCTP Cohort.
ID2	Sample_Name	Sample_ID	Sample_Type	Nucleotide_Type	Disease	Cancer_Progression	Tissue/ Cancer Type
1	mctp_sample_1	mctp_sample_1	tissue	RNA	breast_carcinoma	cancer	BRCA
2	mctp_sample_2	mctp_sample_2	tissue	RNA	breast_carcinoma	cancer	BRCA
3	mctp_sample_3	mctp_sample_3	tissue	RNA	breast_carcinoma	cancer	BRCA
4	mctp_sample_4	mctp_sample_4	tissue	RNA	breast_carcinoma	cancer	BRCA
5	mctp_sample_5	mctp_sample_5	tissue	RNA	breast_carcinoma	cancer	BRCA
6	mctp_sample_6	mctp_sample_6	tissue	RNA	breast_carcinoma	cancer	BRCA
7	mctp_sample_7	mctp_sample_7	tissue	RNA	breast_carcinoma	cancer	BRCA
8	mctp_sample_8	mctp_sample_8	tissue	RNA	breast_carcinoma	cancer	BRCA
9	mctp_sample_9	mctp_sample_9	tissue	RNA	breast_carcinoma	cancer	BRCA
10	mctp_sample_10	mctp_sample_10	tissue	RNA	breast_carcinoma	cancer	BRCA
11	mctp_sample_11	mctp_sample_11	tissue	RNA	breast_carcinoma	cancer	BRCA
12	mctp_sample_12	mctp_sample_12	tissue	RNA	breast_carcinoma	cancer	BRCA
13	mctp_sample_13	mctp_sample_13	tissue	RNA	breast_carcinoma	cancer	BRCA
14	mctp_sample_14	mctp_sample_14	tissue	RNA	breast_carcinoma	cancer	BRCA
15	mctp_sample_15	mctp_sample_15	tissue	RNA	breast_carcinoma	cancer	BRCA
16	mctp_sample_16	mctp_sample_16	tissue	RNA	breast_carcinoma	cancer	BRCA
17	mctp_sample_17	mctp_sample_17	tissue	RNA	breast_carcinoma	cancer	BRCA
18	mctp_sample_18	mctp_sample_18	tissue	RNA	breast_carcinoma	cancer	BRCA
19	mctp_sample_19	mctp_sample_19	tissue	RNA	breast_carcinoma	cancer	BRCA
20	mctp_sample_20	mctp_sample_20	tissue	RNA	breast_carcinoma	cancer	BRCA
21	mctp_sample_21	mctp_sample_21	tissue	RNA	breast_carcinoma	cancer	BRCA
22	mctp_sample_22	mctp_sample_22	tissue	RNA	breast_carcinoma	cancer	BRCA
23	mctp_sample_23	mctp_sample_23	tissue	RNA	breast_carcinoma	cancer	BRCA
24	mctp_sample_24	mctp_sample_24	tissue	RNA	breast_carcinoma	cancer	BRCA
25	mctp_sample_25	mctp_sample_25	tissue	RNA	breast_carcinoma	cancer	BRCA
26	mctp_sample_26	mctp_sample_26	tissue	RNA	breast_carcinoma	cancer	BRCA
27	mctp_sample_27	mctp_sample_27	tissue	RNA	breast_carcinoma	cancer	BRCA
28	mctp_sample_28	mctp_sample_28	tissue	RNA	breast_carcinoma	cancer	BRCA
29	mctp_sample_29	mctp_sample_29	tissue	RNA	breast_carcinoma	cancer	BRCA
30	mctp_sample_30	mctp_sample_30	tissue	RNA	breast_carcinoma	cancer	BRCA
31	mctp_sample_31	mctp_sample_31	tissue	RNA	breast_carcinoma	cancer	BRCA
32	mctp_sample_32	mctp_sample_32	tissue	RNA	breast_carcinoma	cancer	BRCA
33	mctp_sample_33	mctp_sample_33	tissue	RNA	breast_carcinoma	cancer	BRCA
34	mctp_sample_34	mctp_sample_34	tissue	RNA	breast_carcinoma	cancer	BRCA
35	mctp_sample_35	mctp_sample_35	tissue	RNA	breast_carcinoma	cancer	BRCA
36	mctp_sample_36	mctp_sample_36	tissue	RNA	breast_carcinoma	cancer	BRCA
37	mctp_sample_37	mctp_sample_37	tissue	RNA	breast_carcinoma	cancer	BRCA
38	mctp_sample_38	mctp_sample_38	tissue	RNA	breast_carcinoma	cancer	BRCA
39	mctp_sample_39	mctp_sample_39	tissue	RNA	breast_carcinoma	cancer	BRCA
40	mctp_sample_40	mctp_sample_40	tissue	RNA	breast_carcinoma	cancer	BRCA
41	mctp_sample_41	mctp_sample_41	tissue	RNA	breast_carcinoma	cancer	BRCA
42	mctp_sample_42	mctp_sample_42	tissue	RNA	breast_carcinoma	cancer	BRCA
43	mctp_sample_43	mctp_sample_43	tissue	RNA	breast_carcinoma	cancer	BRCA
44	mctp_sample_44	mctp_sample_44	tissue	RNA	breast_carcinoma	cancer	BRCA
45	mctp_sample_45	mctp_sample_45	tissue	RNA	breast_carcinoma	cancer	BRCA
46	mctp_sample_46	mctp_sample_46	tissue	RNA	breast_carcinoma	cancer	BRCA
47	mctp_sample_47	mctp_sample_47	tissue	RNA	breast_carcinoma	cancer	BRCA
48	mctp_sample_48	mctp_sample_48	tissue	RNA	breast_carcinoma	metastatic	BRCA
49	mctp_sample_49	brca_hcc1599	cell_line	RNA	breast_invasive_ductal_carcinoma	cancer	BRCA
50	mctp_sample_50	brca_hcc2218	cell_line	RNA	breast_invasive_ductal_carcinoma	cancer	BRCA
51	mctp_sample_51	mctp_sample_51	tissue	RNA	breast_carcinoma	cancer	BRCA
52	mctp_sample_52	mctp_sample_52	tissue	RNA	breast_carcinoma	cancer	BRCA
53	mctp_sample_53	mctp_sample_53	tissue	RNA	breast_carcinoma	cancer	BRCA
54	mctp_sample_54	mctp_sample_54	tissue	RNA	breast_carcinoma	cancer	BRCA
55	mctp_sample_55	mctp_sample_55	tissue	RNA	breast_carcinoma	cancer	BRCA
56	mctp_sample_56	mctp_sample_56	tissue	RNA	breast_carcinoma	cancer	BRCA
57	mctp_sample_57	mctp_sample_57	tissue	RNA	breast_carcinoma	cancer	BRCA
58	mctp_sample_58	mctp_sample_58	tissue	RNA	breast_carcinoma	cancer	BRCA
59	mctp_sample_59	mctp_sample_59	tissue	RNA	breast_carcinoma	cancer	BRCA
60	mctp_sample_60	mctp_sample_60	tissue	RNA	breast_carcinoma	cancer	BRCA
61	mctp_sample_61	mctp_sample_61	tissue	RNA	rare_cancer_cholangiocarcinoma	cancer	CHOLANGIO
62	mctp_sample_62	mctp_sample_62	tissue	RNA	rare_cancer_cholangiocarcinoma	cancer	CHOLANGIO
63	mctp_sample_63	mctp_sample_63	tissue	RNA	rare_cancer_cholangiocarcinoma	cancer	CHOLANGIO
64	mctp_sample_64	mctp_sample_64	tissue	RNA	rare_cancer_cholangiocarcinoma	cancer	CHOLANGIO
65	mctp_sample_65	mctp_sample_65	tissue	RNA	rare_cancer_cholangiocarcinoma	cancer	CHOLANGIO
66	mctp_sample_66	mctp_sample_66	tissue	RNA	rare_cancer_hodgkins_lymphoma	cancer	HODGKINS
67	mctp_sample_67	mctp_sample_67	tissue	RNA	adrenocortical_carcinoma	cancer	ADRENOCORTICAL
68	mctp_sample_68	mctp_sample_68	tissue	RNA	rare_cancer_cervical_cancer	cancer	RARE
69	mctp_sample_69	pt_lncap_1	cell_line	RNA	prostate_adenocarcinoma	cancer	PRCA
70	mctp_sample_70	pt_lncap_2	cell_line	RNA	prostate_adenocarcinoma	cancer	PRCA
71	mctp_sample_71	pt_lncap_3	cell_line	RNA	prostate_adenocarcinoma	cancer	PRCA
72	mctp_sample_72	mctp_sample_72	tissue	RNA	lung_adenocarcinoma	cancer	LUAD
73	mctp_sample_73	mctp_sample_73	tissue	RNA	lung_adenocarcinoma	cancer	LUAD
74	mctp_sample_74	mctp_sample_74	tissue	RNA	lung_adenocarcinoma	cancer	LUAD
75	mctp_sample_75	mctp_sample_75	tissue	RNA	lung_adenocarcinoma	cancer	LUAD
76	mctp_sample_76	mctp_sample_76	tissue	RNA	lung_adenocarcinoma	cancer	LUAD
77	mctp_sample_77	mctp_sample_77	tissue	RNA	lung_adenocarcinoma	cancer	LUAD
78	mctp_sample_78	mctp_sample_78	tissue	RNA	lung_adenocarcinoma	cancer	LUAD
79	mctp_sample_79	mctp_sample_79	tissue	RNA	lung_adenocarcinoma	cancer	LUAD
80	mctp_sample_80	mctp_sample_80	tissue	RNA	lung_adenocarcinoma	cancer	LUAD
81	mctp_sample_81	mctp_sample_81	tissue	RNA	lung_adenocarcinoma	cancer	LUAD
82	mctp_sample_82	mctp_sample_82	tissue	RNA	benign	benign	BENIGN
83	mctp_sample_83	mctp_sample_83	tissue	RNA	lung_adenocarcinoma	cancer	LUAD
84	mctp_sample_84	mctp_sample_84	tissue	RNA	lung_adenocarcinoma	cancer	LUAD
85	mctp_sample_85	lung_A427	cell_line	RNA	lung_adenocarcinoma	cancer	LUCL
86	mctp_sample_86	mctp_sample_86	tissue	RNA	lung_adenocarcinoma	cancer	LUAD
87	mctp_sample_87	mctp_sample_87	tissue	RNA	lung_adenocarcinoma	cancer	LUAD
88	mctp_sample_88	mctp_sample_88	tissue	RNA	lung_adenocarcinoma	cancer	LUAD
89	mctp_sample_89	lung_A549	cell_line	RNA	lung_carcinoma	cancer	LUCL
90	mctp_sample_90	mctp_sample_90	tissue	RNA	lung_adenocarcinoma	cancer	LUAD
91	mctp_sample_91	mctp_sample_91	tissue	RNA	lung_adenocarcinoma	cancer	LUAD
92	mctp_sample_92	mctp_sample_92	tissue	RNA	benign	benign	BENIGN
93	mctp_sample_93	mctp_sample_93	tissue	RNA	lung_adenocarcinoma	cancer	LUAD
94	mctp_sample_94	mctp_sample_94	tissue	RNA	benign	benign	BENIGN
95	mctp_sample_95	mctp_sample_95	tissue	RNA	lung_adenocarcinoma	cancer	LUAD
96	mctp_sample_96	mctp_sample_96	tissue	RNA	lung_adenocarcinoma	cancer	LUAD
97	mctp_sample_97	mctp_sample_97	tissue	RNA	lung_adenocarcinoma	cancer	LUAD
98	mctp_sample_98	mctp_sample_98	tissue	RNA	lung_adenocarcinoma	cancer	LUAD
99	mctp_sample_99	mctp_sample_99	tissue	RNA	lung_adenocarcinoma	cancer	LUAD
100	mctp_sample_100	mctp_sample_100	tissue	RNA	lung_adenocarcinoma	cancer	LUAD
101	mctp_sample_101	mctp_sample_101	tissue	RNA	lung_adenocarcinoma	cancer	LUAD
102	mctp_sample_102	mctp_sample_102	tissue	RNA	lung_adenocarcinoma	cancer	LUAD
103	mctp_sample_103	mctp_sample_103	tissue	RNA	lung_squamous_carcinoma	cancer	LUSC
104	mctp_sample_104	mctp_sample_104	tissue	RNA	lung_adenocarcinoma	cancer	LUAD
105	mctp_sample_105	mctp_sample_105	tissue	RNA	lung_adenocarcinoma	cancer	LUAD
106	mctp_sample_106	mctp_sample_106	tissue	RNA	lung_adenocarcinoma	cancer	LUAD
107	mctp_sample_107	mctp_sample_107	tissue	RNA	lung_adenocarcinoma	cancer	LUAD
108	mctp_sample_108	mctp_sample_108	tissue	RNA	lung_adenocarcinoma	cancer	LUAD
109	mctp_sample_109	mctp_sample_109	tissue	RNA	lung_adenocarcinoma	cancer	LUAD
110	mctp_sample_110	mctp_sample_110	tissue	RNA	lung_adenocarcinoma	cancer	LUAD
111	mctp_sample_111	mctp_sample_111	tissue	RNA	lung_adenocarcinoma	cancer	LUAD
112	mctp_sample_112	mctp_sample_112	tissue	RNA	lung_adenocarcinoma	cancer	LUAD
113	mctp_sample_113	mctp_sample_113	tissue	RNA	lung_adenocarcinoma	cancer	LUAD
114	mctp_sample_114	mctp_sample_114	tissue	RNA	lung_adenocarcinoma	cancer	LUAD
115	mctp_sample_115	mctp_sample_115	tissue	RNA	lung_adenocarcinoma	cancer	LUAD
116	mctp_sample_116	mctp_sample_116	tissue	RNA	lung_adenocarcinoma	cancer	LUAD
117	mctp_sample_117	mctp_sample_117	tissue	RNA	lung_adenocarcinoma	cancer	LUAD
118	mctp_sample_118	mctp_sample_118	tissue	RNA	lung_adenocarcinoma	cancer	LUAD
119	mctp_sample_119	mctp_sample_119	tissue	RNA	lung_adenocarcinoma	cancer	LUAD
120	mctp_sample_120	mctp_sample_120	tissue	RNA	lung_adenocarcinoma	cancer	LUAD
121	mctp_sample_121	mctp_sample_121	tissue	RNA	lung_adenocarcinoma	cancer	LUAD
122	mctp_sample_122	mctp_sample_122	tissue	RNA	lung_adenocarcinoma	cancer	LUAD
123	mctp_sample_123	mctp_sample_123	tissue	RNA	lung_adenocarcinoma	cancer	LUAD
124	mctp_sample_124	mctp_sample_124	tissue	RNA	lung_adenocarcinoma	cancer	LUAD
125	mctp_sample_125	mctp_sample_125	tissue	RNA	lung_adenocarcinoma	cancer	LUAD
126	mctp_sample_126	mctp_sample_126	tissue	RNA	lung_adenocarcinoma	cancer	LUAD
127	mctp_sample_127	mctp_sample_127	tissue	RNA	lung_adenocarcinoma	cancer	LUAD
128	mctp_sample_128	mctp_sample_128	tissue	RNA	lung_adenocarcinoma	cancer	LUAD
129	mctp_sample_129	mctp_sample_129	tissue	RNA	lung_adenocarcinoma	cancer	LUAD
130	mctp_sample_130	mctp_sample_130	tissue	RNA	lung_adenocarcinoma	cancer	LUAD
131	mctp_sample_131	mctp_sample_131	tissue	RNA	lung_adenocarcinoma	cancer	LUAD
132	mctp_sample_132	mctp_sample_132	tissue	RNA	lung_adenocarcinoma	cancer	LUAD
133	mctp_sample_133	mctp_sample_133	tissue	RNA	lung_adenocarcinoma	cancer	LUAD
134	mctp_sample_134	mctp_sample_134	tissue	RNA	lung_adenocarcinoma	cancer	LUAD
135	mctp_sample_135	mctp_sample_135	tissue	RNA	lung_adenocarcinoma	cancer	LUAD
136	mctp_sample_136	mctp_sample_136	tissue	RNA	lung_adenocarcinoma	cancer	LUAD
137	mctp_sample_137	mctp_sample_137	tissue	RNA	lung_adenocarcinoma	cancer	LUAD
138	mctp_sample_138	mctp_sample_138	tissue	RNA	lung_adenocarcinoma	cancer	LUAD
139	mctp_sample_139	mctp_sample_139	tissue	RNA	lung_adenocarcinoma	cancer	LUAD
140	mctp_sample_140	mctp_sample_140	tissue	RNA	lung_adenocarcinoma	cancer	LUAD
141	mctp_sample_141	mctp_sample_141	tissue	RNA	lung_adenocarcinoma	cancer	LUAD
142	mctp_sample_142	mctp_sample_142	tissue	RNA	lung_large_cell_carcinoma	cancer	LUAD
143	mctp_sample_143	mctp_sample_143	tissue	RNA	lung_endobronchial_cancer	cancer	LUCL
144	mctp_sample_144	mctp_sample_144	tissue	RNA	lung_endobronchial_cancer	cancer	LUCL
145	mctp_sample_145	lung_esophageal_flo	cell_line	RNA	lung_esophageal_adenocarcinoma	cancer	LUCL
146	mctp_sample_146	lung_esophageal_het	cell_line	RNA	lung_esophageal_adenocarcinoma	cancer	LUCL
147	mctp_sample_147	lung_esophageal_oe33	cell_line	RNA	lung_esophageal_adenocarcinoma	cancer	LUCL
148	mctp_sample_148	lung_H1155	cell_line	RNA	lung_adenocarcinoma	cancer	LUCL
149	mctp_sample_149	lung_H1437	cell_line	RNA	lung_carcinoma	cancer	LUCL
150	mctp_sample_150	lung_H1651	cell_line	RNA	lung_carcinoma	cancer	LUCL
151	mctp_sample_151	lung_H1734	cell_line	RNA	lung_adenocarcinoma	cancer	LUCL
152	mctp_sample_152	lung_H1792	cell_line	RNA	lung_adenocarcinoma	cancer	LUCL
153	mctp_sample_153	lung_H1793	cell_line	RNA	lung_adenocarcinoma	cancer	LUCL
154	mctp_sample_154	lung_H1838	cell_line	RNA	lung_adenocarcinoma	cancer	LUCL
155	mctp_sample_155	lung_H1975	cell_line	RNA	lung_carcinoma	cancer	LUCL
156	mctp_sample_156	lung_H2009	cell_line	RNA	lung_adenocarcinoma	cancer	LUCL
157	mctp_sample_157	lung_H2122	cell_line	RNA	lung_adenocarcinoma	cancer	LUCL
158	mctp_sample_158	lung_H2170	cell_line	RNA	lung_squamous_carcinoma	cancer	LUCL
159	mctp_sample_159	lung_H2228	cell_line	RNA	lung_carcinoma	cancer	LUCL
160	mctp_sample_160	lung_H23	cell_line	RNA	lung_adenocarcinoma	cancer	LUCL
161	mctp_sample_161	lung_H358	cell_line	RNA	lung_adenocarcinoma	cancer	LUCL
162	mctp_sample_162	lung_H441	cell_line	RNA	lung_adenocarcinoma	metastatic	LUCL
163	mctp_sample_163	lung_H460	cell_line	RNA	lung_adenocarcinoma	cancer	LUCL
164	mctp_sample_164	lung_H522	cell_line	RNA	lung_adenocarcinoma	cancer	LUCL
165	mctp_sample_165	lung_H526	cell_line	RNA	lung_small_cell_carcinoma	cancer	LUCL
166	mctp_sample_166	lung_H727	cell_line	RNA	lung_carcinoma	cancer	LUCL
167	mctp_sample_167	lung_H827	cell_line	RNA	lung_adenocarcinoma	cancer	LUCL
168	mctp_sample_168	lung_H838	cell_line	RNA	lung_carcinoma	cancer	LUCL
169	mctp_sample_169	mctp_sample_169	tissue	RNA	lung_adenocarcinoma	cancer	LUAD
170	mctp_sample_170	mctp_sample_170	tissue	RNA	lung_large_cell_carcinoma	cancer	LULC
171	mctp_sample_171	mctp_sample_171	tissue	RNA	lung_large_cell_carcinoma	cancer	LULC
172	mctp_sample_172	mctp_sample_172	tissue	RNA	lung_large_cell_carcinoma	cancer	LULC
173	mctp_sample_173	mctp_sample_173	tissue	RNA	lung_large_cell_carcinoma	cancer	LULC
174	mctp_sample_174	mctp_sample_174	tissue	RNA	lung_large_cell_carcinoma	cancer	LULC
175	mctp_sample_175	mctp_sample_175	tissue	RNA	lung_large_cell_carcinoma	cancer	LULC
176	mctp_sample_176	mctp_sample_176	tissue	RNA	lung_large_cell_carcinoma	cancer	LULC
177	mctp_sample_177	mctp_sample_177	tissue	RNA	lung_large_cell_carcinoma	cancer	LULC
178	mctp_sample_178	mctp_sample_178	tissue	RNA	lung_squamous_carcinoma	cancer	LUSC
179	mctp_sample_179	mctp_sample_179	tissue	RNA	lung_squamous_carcinoma	cancer	LUSC
180	mctp_sample_180	mctp_sample_180	tissue	RNA	lung_squamous_carcinoma	cancer	LUSC
181	mctp_sample_181	mctp_sample_181	tissue	RNA	lung_squamous_carcinoma	cancer	LUSC
182	mctp_sample_182	mctp_sample_182	tissue	RNA	lung_squamous_carcinoma	cancer	LUSC
183	mctp_sample_183	mctp_sample_183	tissue	RNA	lung_squamous_carcinoma	cancer	LUSC
184	mctp_sample_184	mctp_sample_184	tissue	RNA	lung_squamous_carcinoma	cancer	LUSC
185	mctp_sample_185	mctp_sample_185	tissue	RNA	lung_squamous_carcinoma	cancer	LUSC
186	mctp_sample_186	mctp_sample_186	tissue	RNA	lung_squamous_carcinoma	cancer	LUSC
187	mctp_sample_187	mctp_sample_187	tissue	RNA	lung_squamous_carcinoma	cancer	LUSC
188	mctp_sample_188	mctp_sample_188	tissue	RNA	lung_squamous_carcinoma	cancer	LUSC
189	mctp_sample_189	mctp_sample_189	tissue	RNA	lung_squamous_carcinoma	cancer	LUSC
190	mctp_sample_190	mctp_sample_190	tissue	RNA	lung_squamous_carcinoma	cancer	LUSC
191	mctp_sample_191	mctp_sample_191	tissue	RNA	lung_squamous_carcinoma	cancer	LUSC
192	mctp_sample_192	mctp_sample_192	tissue	RNA	lung_squamous_carcinoma	cancer	LUSC
193	mctp_sample_193	mctp_sample_193	tissue	RNA	lung_squamous_carcinoma	cancer	LUSC
194	mctp_sample_194	mctp_sample_194	tissue	RNA	lung_squamous_carcinoma	cancer	LUSC
195	mctp_sample_195	mctp_sample_195	tissue	RNA	lung_squamous_carcinoma	cancer	LUSC
196	mctp_sample_196	mctp_sample_196	tissue	RNA	lung_squamous_carcinoma	cancer	LUSC
197	mctp_sample_197	mctp_sample_197	tissue	RNA	lung_squamous_carcinoma	cancer	LUSC
198	mctp_sample_198	mctp_sample_198	tissue	RNA	lung_squamous_carcinoma	cancer	LUSC
199	mctp_sample_199	mctp_sample_199	tissue	RNA	lung_squamous_carcinoma	cancer	LUSC
200	mctp_sample_200	mctp_sample_200	tissue	RNA	lung_squamous_carcinoma	cancer	LUSC
201	mctp_sample_201	mctp_sample_201	tissue	RNA	lung_squamous_carcinoma	cancer	LUSC
202	mctp_sample_202	mctp_sample_202	tissue	RNA	lung_squamous_carcinoma	cancer	LUSC
203	mctp_sample_203	mctp_sample_203	tissue	RNA	lung_squamous_carcinoma	cancer	LUSC
204	mctp_sample_204	mctp_sample_204	tissue	RNA	lung_squamous_carcinoma	cancer	LUSC
205	mctp_sample_205	mctp_sample_205	tissue	RNA	lung_squamous_carcinoma	cancer	LUSC
206	mctp_sample_206	mctp_sample_206	tissue	RNA	lung_squamous_carcinoma	cancer	LUSC
207	mctp_sample_207	mctp_sample_207	tissue	RNA	lung_squamous_carcinoma	cancer	LUSC
208	mctp_sample_208	mctp_sample_208	tissue	RNA	lung_squamous_carcinoma	cancer	LUSC
209	mctp_sample_209	mctp_sample_209	tissue	RNA	lung_squamous_carcinoma	cancer	LUSC
210	mctp_sample_210	mctp_sample_210	tissue	RNA	lung_squamous_carcinoma	cancer	LUSC
211	mctp_sample_211	mctp_sample_211	tissue	RNA	lung_squamous_carcinoma	cancer	LUSC
212	mctp_sample_212	mctp_sample_212	tissue	RNA	lung_squamous_carcinoma	cancer	LUSC
213	mctp_sample_213	mctp_sample_213	tissue	RNA	lung_squamous_carcinoma	cancer	LUSC
214	mctp_sample_214	mctp_sample_214	tissue	RNA	benign	benign	BENIGN
215	mctp_sample_215	mctp_sample_215	tissue	RNA	benign	benign	BENIGN
216	mctp_sample_216	mctp_sample_216	tissue	RNA	benign	benign	BENIGN
217	mctp_sample_217	lung_SKLU1	cell_line	RNA	lung_carcinoma	cancer	LUCL
218	mctp_sample_218	lung_SKMES1	cell_line	RNA	lung_squamous_carcinoma	cancer	LUCL
219	mctp_sample_219	lung_sw900	cell_line	RNA	lung_carcinoma	cancer	LUCL
220	mctp_sample_220	mctp_sample_220	tissue	RNA	meningioma	cancer	MENINGIOMA
221	mctp_sample_221	mctp_sample_221	tissue	RNA	meningioma	cancer	MENINGIOMA
222	mctp_sample_222	meningioma_559097	cell_line	RNA	meningioma	cancer	MENINGIOMA
223	mctp_sample_223	mctp_sample_223	tissue	RNA	meningioma	cancer	MENINGIOMA
224	mctp_sample_224	mctp_sample_224	tissue	RNA	meningioma	cancer	MENINGIOMA
225	mctp_sample_225	mctp_sample_225	tissue	RNA	meningioma	cancer	MENINGIOMA
226	mctp_sample_226	mctp_sample_226	tissue	RNA	meningioma	cancer	MENINGIOMA
227	mctp_sample_227	mctp_sample_227	tissue	RNA	meningioma	cancer	MENINGIOMA
228	mctp_sample_228	mctp_sample_228	tissue	RNA	meningioma	cancer	MENINGIOMA
229	mctp_sample_229	mctp_sample_229	tissue	RNA	meningioma	cancer	MENINGIOMA
230	mctp_sample_230	mctp_sample_230	tissue	RNA	meningioma	cancer	MENINGIOMA
231	mctp_sample_231	mctp_sample_231	tissue	RNA	meningioma	cancer	MENINGIOMA
232	mctp_sample_232	mctp_sample_232	tissue	RNA	rare_cancer_brain_hemangiopericytoma	cancer	RARE
233	mctp_sample_233	mctp_sample_233	tissue	RNA	rare_cancer_hodgkins_lymphoma	cancer	HODGKINS
234	mctp_sample_234	mctp_sample_234	tissue	RNA	rare_cancer_cholangiocarcinoma	cancer	CHOLANGIO
235	mctp_sample_235	mctp_sample_235	tissue	RNA	rare_cancer_lymphoid	cancer	RARE
236	mctp_sample_236	mctp_sample_236	tissue	RNA	rare_cancer_myeloprolferative_neoplasm	cancer	MPN
237	mctp_sample_237	mctp_sample_237	tissue	RNA	rare_cancer	cancer	RARE
238	mctp_sample_238	mctp_sample_238	tissue	RNA	bladder_carcinoma	cancer	BLADDER
239	mctp_sample_239	mctp_sample_239	tissue	RNA	rare_cancer_rhabdomyosarcoma	cancer	RHABDOMYOSARCOMA
240	mctp_sample_240	mctp_sample_240	tissue	RNA	rare_cancer_sarcoma	cancer	SARCOMA
241	mctp_sample_241	mctp_sample_241	tissue	RNA	rare_cancer_cholangiocarcinoma	cancer	CHOLANGIO
242	mctp_sample_242	mctp_sample_242	tissue	RNA	adrenocortical_carcinoma	cancer	ADRENOCORTICAL
243	mctp_sample_243	mctp_sample_243	tissue	RNA	rare_cancer_pleural_effusion	cancer	PLEURAL
244	mctp_sample_244	mctp_sample_244	tissue	RNA	breast_metastatic_carcinoma	metastatic	BRCA
245	mctp_sample_245	mctp_sample_245	tissue	RNA	breast_carcinoma	cancer	BRCA
246	mctp_sample_246	mctp_sample_246	tissue	RNA	squamous_cell_carcinoma	cancer	SSC
247	mctp_sample_247	mctp_sample_247	tissue	RNA	rare_cancer_cholangiocarcinoma	cancer	CHOLANGIO
248	mctp_sample_248	mctp_sample_248	tissue	RNA	adrenocortical_carcinoma	cancer	ADRENOCORTICAL
249	mctp_sample_249	mctp_sample_249	tissue	RNA	clear_cell_carcinoma	cancer	CLEAR_CELL_CARCINOMA
250	mctp_sample_250	mctp_sample_250	tissue	RNA	rare_cancer_penile	cancer	RARE
251	mctp_sample_251	mctp_sample_251	tissue	RNA	rare_cancer_ewings_sarcoma	cancer	RARE
252	mctp_sample_252	mctp_sample_252	tissue	RNA	rare_cancer_squamous	cancer	RARE
253	mctp_sample_253	mctp_sample_253	tissue	RNA	breast_metastatic_carcinoma	metastatic	BRCA
254	mctp_sample_254	mctp_sample_254	tissue	RNA	adrenocortical_carcinoma	cancer	ADRENOCORTICAL
255	mctp_sample_255	mctp_sample_255	tissue	RNA	squamous_cell_carcinoma	cancer	SSC
256	mctp_sample_256	mctp_sample_256	tissue	RNA	rare_cancer_sarcoma	cancer	SARCOMA
257	mctp_sample_257	mctp_sample_257	tissue	RNA	rare_cancer_thymoma	cancer	RARE
258	mctp_sample_258	mctp_sample_258	tissue	RNA	rare_cancer_ameloblastoma	cancer	RARE
259	mctp_sample_259	mctp_sample_259	tissue	RNA	renal_cancer_carcinoma	cancer	RARE
260	mctp_sample_260	mctp_sample_260	tissue	RNA	rare_cancer_cystic_carcinoma	cancer	RARE
261	mctp_sample_261	mctp_sample_261	tissue	RNA	breast_metastatic_carcinoma	metastatic	BRCA
262	mctp_sample_262	mctp_sample_262	tissue	RNA	esophageal_cancer	cancer	ESOPHAGEAL
263	mctp_sample_263	mctp_sample_263	tissue	RNA	breast_metastatic_carcinoma	metastatic	BRCA
264	mctp_sample_264	mctp_sample_264	tissue	RNA	breast_metastatic_carcinoma	metastatic	BRCA
265	mctp_sample_265	mctp_sample_265	tissue	RNA	rare_cancer_melanoma	cancer	RARE
266	mctp_sample_266	mctp_sample_266	tissue	RNA	rare_cancer	cancer	RARE
267	mctp_sample_267	mctp_sample_267	tissue	RNA	squamous_cell_carcinoma	cancer	SSC
268	mctp_sample_268	mctp_sample_268	tissue	RNA	rare_cancer_rectal_adenocarcinoma	cancer	RARE
269	mctp_sample_269	mctp_sample_269	tissue	RNA	prostate_adenocarcinoma	cancer	PRCA
270	mctp_sample_270	mctp_sample_270	tissue	RNA	rare_cancer_head_neck_carcinoma	cancer	RARE
271	mctp_sample_271	mctp_sample_271	tissue	RNA	rare_cancer_sarcomatoid_carcinoma	cancer	SARCOMA
272	mctp_sample_272	mctp_sample_272	tissue	RNA	rare_cancer_gastric_carcinoma	cancer	RARE
273	mctp_sample_273	mctp_sample_273	tissue	RNA	rare_cancer_unknown_primary_carcinoma	cancer	RARE
274	mctp_sample_274	mctp_sample_274	tissue	RNA	colon_adenocarcinoma	cancer	COLON
275	mctp_sample_275	osteosarcoma_hu09	cell_line	RNA	sarcoma_osteosarcoma	cancer	OSTEOSARCOMA
276	mctp_sample_276	mctp_sample_276	tissue	RNA	sarcoma_osteosarcoma	cancer	OSTEOSARCOMA
277	mctp_sample_277	osteosarcoma_mg63	cell_line	RNA	sarcoma_osteosarcoma	cancer	OSTEOSARCOMA
278	mctp_sample_278	osteosarcoma_os99	cell_line	RNA	sarcoma_osteosarcoma	cancer	OSTEOSARCOMA
279	mctp_sample_279	osteosarcoma_soas2	cell_line	RNA	sarcoma_osteosarcoma	metastatic	OSTEOSARCOMA
280	mctp_sample_280	ovarian_59M	cell_line	RNA	ovarian_carcinoma	metastatic	OVARIAN
281	mctp_sample_281	ovarian_A2780	cell_line	RNA	ovarian_carcinoma	metastatic	OVARIAN
282	mctp_sample_282	ovarian_es2	cell_line	RNA	ovarian_carcinoma	cancer	OVARIAN
283	mctp_sample_283	ovarian_hch1	cell_line	RNA	ovarian_carcinoma	cancer	OVARIAN
284	mctp_sample_284	ovarian_Hec59	cell_line	RNA	ovarian_carcinoma	cancer	OVARIAN
285	mctp_sample_285	ovarian_igrov1	cell_line	RNA	ovarian_carcinoma	cancer	OVARIAN
286	mctp_sample_286	ovarian_OAW28	cell_line	RNA	ovarian_carcinoma	cancer	OVARIAN
287	mctp_sample_287	ovarian_oc316	cell_line	RNA	ovarian_carcinoma	cancer	OVARIAN
288	mctp_sample_288	ovarian_ovacr5	cell_line	RNA	ovarian_carcinoma	cancer	OVARIAN
289	mctp_sample_289	ovarian_ovas	cell_line	RNA	ovarian_carcinoma	cancer	OVARIAN
290	mctp_sample_290	ovarian_ovcar3	cell_line	RNA	ovarian_carcinoma	cancer	OVARIAN
291	mctp_sample_291	ovarian_OVCAR4	cell_line	RNA	ovarian_carcinoma	cancer	OVARIAN
292	mctp_sample_292	ovarian_ovmana	cell_line	RNA	ovarian_carcinoma	cancer	OVARIAN
293	mctp_sample_293	ovarian_ovsayo	cell_line	RNA	ovarian_carcinoma	cancer	OVARIAN
294	mctp_sample_294	ovarian_ovtoko	cell_line	RNA	ovarian_carcinoma	cancer	OVARIAN
295	mctp_sample_295	ovarian_PE01	cell_line	RNA	ovarian_carcinoma	cancer	OVARIAN
296	mctp_sample_296	ovarian_pea1	cell_line	RNA	ovarian_carcinoma	cancer	OVARIAN
297	mctp_sample_297	ovarian_peo23	cell_line	RNA	ovarian_carcinoma	cancer	OVARIAN
298	mctp_sample_298	ovarian_RMG1	cell_line	RNA	ovarian_carcinoma	cancer	OVARIAN
299	mctp_sample_299	ovarian_TOV112D	cell_line	RNA	ovarian_carcinoma	cancer	OVARIAN
300	mctp_sample_300	ovarian_TOV21	cell_line	RNA	ovarian_carcinoma	cancer	OVARIAN
301	mctp_sample_301	ovarian_UC101	cell_line	RNA	ovarian_carcinoma	cancer	OVARIAN
302	mctp_sample_302	ovarian_UH01	cell_line	RNA	ovarian_carcinoma	cancer	OVARIAN
303	mctp_sample_303	mctp_sample_303	tissue	RNA	pancreas_pen	cancer	PANC
304	mctp_sample_304	mctp_sample_304	tissue	RNA	pancreas_pen	cancer	PANC
305	mctp_sample_305	mctp_sample_305	tissue	RNA	pancreas_pen	cancer	PANC
306	mctp_sample_306	mctp_sample_306	tissue	RNA	pancreas_pen	cancer	PANC
307	mctp_sample_307	mctp_sample_307	tissue	RNA	pancreas_pen	cancer	PANC
308	mctp_sample_308	mctp_sample_308	tissue	RNA	pancreas_pen	cancer	PANC
309	mctp_sample_309	mctp_sample_309	tissue	RNA	pancreas_pen	cancer	PANC
310	mctp_sample_310	mctp_sample_310	tissue	RNA	pancreas_pen	cancer	PANC
311	mctp_sample_311	mctp_sample_311	tissue	RNA	pancreas_pen	cancer	PANC
312	mctp_sample_312	mctp_sample_312	tissue	RNA	pancreas_pen	cancer	PANC
313	mctp_sample_313	mctp_sample_313	tissue	RNA	pancreas_pen	cancer	PANC
314	mctp_sample_314	mctp_sample_314	tissue	RNA	pancreas_pen	cancer	PANC
315	mctp_sample_315	mctp_sample_315	tissue	RNA	pancreas_pen	cancer	PANC
316	mctp_sample_316	mctp_sample_316	tissue	RNA	pancreas_pen	cancer	PANC
317	mctp_sample_317	mctp_sample_317	tissue	RNA	pancreas_pen	cancer	PANC
318	mctp_sample_318	mctp_sample_318	tissue	RNA	pancreas_pen	cancer	PANC
319	mctp_sample_319	mctp_sample_319	tissue	RNA	pancreas_pen	cancer	PANC
320	mctp_sample_320	mctp_sample_320	tissue	RNA	rare_cancer_neuroblastoma	cancer	RARE
321	mctp_sample_321	mctp_sample_321	tissue	RNA	meningioma	cancer	MENINGIOMA
322	mctp_sample_322	mctp_sample_322	tissue	RNA	preb_cell_all	cancer	RARE
323	mctp_sample_323	mctp_sample_323	tissue	RNA	rare_cancer_sarcoma	cancer	SARCOMA
324	mctp_sample_324	mctp_sample_324	tissue	RNA	preb_cell_all	cancer	RARE
325	mctp_sample_325	mctp_sample_325	tissue	RNA	aml	cancer	RARE
326	mctp_sample_326	mctp_sample_326	tissue	RNA	rare_cancer_leukemia	cancer	RARE
327	mctp_sample_327	mctp_sample_327	tissue	RNA	rare_cancer_sarcoma	cancer	SARCOMA
328	mctp_sample_328	mctp_sample_328	tissue	RNA	prostate_adenocarcinoma	cancer	PRCA
329	mctp_sample_329	mctp_sample_329	tissue	RNA	prostate_adenocarcinoma	cancer	PRCA
330	mctp_sample_330	mctp_sample_330	tissue	RNA	prostate_adenocarcinoma	cancer	PRCA
331	mctp_sample_331	mctp_sample_331	tissue	RNA	prostate_adenocarcinoma	cancer	PRCA
332	mctp_sample_332	mctp_sample_332	tissue	RNA	prostate_adenocarcinoma	cancer	PRCA
333	mctp_sample_333	mctp_sample_333	tissue	RNA	prostate_adenocarcinoma	cancer	PRCA
334	mctp_sample_334	mctp_sample_334	tissue	RNA	prostate_adenocarcinoma	cancer	PRCA
335	mctp_sample_335	mctp_sample_335	tissue	RNA	prostate_adenocarcinoma	cancer	PRCA
336	mctp_sample_336	mctp_sample_336	tissue	RNA	prostate_adenocarcinoma	cancer	PRCA
337	mctp_sample_337	mctp_sample_337	tissue	RNA	prostate_adenocarcinoma	cancer	PRCA
338	mctp_sample_338	mctp_sample_338	tissue	RNA	prostate_adenocarcinoma	cancer	PRCA
339	mctp_sample_339	prca_rwpe	cell_line	RNA	prostate_benign	benign	BENIGN
340	mctp_sample_346	mctp_sample_346	tissue	RNA	prostate_adenocarcinoma	metastatic	PRCA
341	mctp_sample_340	mctp_sample_340	tissue	RNA	prostate_adenocarcinoma	metastatic	PRCA
342	mctp_sample_341	mctp_sample_341	tissue	RNA	prostate_adenocarcinoma	cancer	PRCA
343	mctp_sample_342	mctp_sample_342	tissue	RNA	prostate_adenocarcinoma	cancer	PRCA
344	mctp_sample_343	mctp_sample_343	tissue	RNA	prostate_adenocarcinoma	cancer	PRCA
345	mctp_sample_344	mctp_sample_344	tissue	RNA	prostate_adenocarcinoma	cancer	PRCA
346	mctp_sample_345	mctp_sample_345	tissue	RNA	prostate_adenocarcinoma	metastatic	PRCA
347	mctp_sample_347	mctp_sample_347	tissue	RNA	prostate_adenocarcinoma	cancer	PRCA
348	mctp_sample_348	mctp_sample_348	tissue	RNA	prostate_adenocarcinoma	cancer	PRCA
349	mctp_sample_349	mctp_sample_349	tissue	RNA	prostate_adenocarcinoma	cancer	PRCA
350	mctp_sample_350	mctp_sample_350	tissue	RNA	prostate_adenocarcinoma	cancer	PRCA
351	mctp_sample_351	mctp_sample_351	tissue	RNA	prostate_adenocarcinoma	cancer	PRCA
352	mctp_sample_352	mctp_sample_352	tissue	RNA	prostate_adenocarcinoma	cancer	PRCA
353	mctp_sample_353	mctp_sample_353	tissue	RNA	prostate_adenocarcinoma	cancer	PRCA
354	mctp_sample_354	mctp_sample_354	tissue	RNA	prostate_adenocarcinoma	cancer	PRCA
355	mctp_sample_355	mctp_sample_355	tissue	RNA	rare_cancer_rhabdomyosarcoma	cancer	RHABDOMYOSARCOMA
356	mctp_sample_356	rare_bewo	cell_line	RNA	rare_cancer_choriocarcinoma	cancer	CHORIO
357	mctp_sample_357	rare_egi1	cell_line	RNA	rare_cancer_bile_duct_carcinoma	cancer	RARE
358	mctp_sample_358	rare_hc1	cell_line	RNA	rare_cancer_hairy_cell_leukemia	metastatic	RARE
359	mctp_sample_359	rare_L428	cell_line	RNA	rare_cancer_hodgkins_lymphoma	cancer	HODGKINS
360	mctp_sample_360	mctp_sample_360	tissue	RNA	rare_cancer_merkel_cell_carcinoma	cancer	MERKEL
361	mctp_sample_361	mctp_sample_361	tissue	RNA	rare_cancer_merkel_cell_carcinoma	cancer	MERKEL
362	mctp_sample_362	mctp_sample_362	tissue	RNA	rare_cancer_merkel_cell_carcinoma	cancer	MERKEL
363	mctp_sample_363	mctp_sample_363	tissue	RNA	rare_cancer_merkel_cell_carcinoma	cancer	MERKEL
364	mctp_sample_364	mctp_sample_364	tissue	RNA	rare_cancer_merkel_cell_carcinoma	cancer	MERKEL
365	mctp_sample_365	mctp_sample_365	tissue	RNA	rare_cancer_merkel_cell_carcinoma	cancer	MERKEL
366	mctp_sample_366	mctp_sample_366	tissue	RNA	rare_cancer_merkel_cell_carcinoma	cancer	MERKEL
367	mctp_sample_367	mctp_sample_367	tissue	RNA	rare_cancer_merkel_cell_carcinoma	cancer	MERKEL
368	mctp_sample_368	mctp_sample_368	tissue	RNA	rare_cancer_rhabdomyosarcoma	cancer	RHABDOMYOSARCOMA
369	mctp_sample_369	rare_snuc	cell_line	RNA	rare_sinonasal_undifferentiated_carcinoma	metastatic	RARE
370	mctp_sample_370	mctp_sample_370	tissue	RNA	rare_cancer_hodgkins_lymphoma	cancer	HODGKINS
371	mctp_sample_371	rare_tfk1	cell_line	RNA	rare_cancer_bile_duct_carcinoma	metastatic	RARE
372	mctp_sample_372	mctp_sample_372	tissue	RNA	rare_cancer_sarcoma	cancer	SARCOMA
373	mctp_sample_373	mctp_sample_373	tissue	RNA	rare_cancer_sarcoma	cancer	SARCOMA
374	mctp_sample_374	pt_vcap_1	cell_line	RNA	prostate_adenocarcinoma	cancer	PRCA
375	mctp_sample_375	pt_vcap_2	cell_line	RNA	prostate_adenocarcinoma	cancer	PRCA
376	mctp_sample_376	pt_vcap_3	cell_line	RNA	prostate_adenocarcinoma	cancer	PRCA

## Sheet: DataS2_Cohort_Alignment_Metrics
# Supplementary DataS2: Cohort Alignment Metrics
SAMPLE_ID	LIBRARY_ID	CATEGORY	TOTAL_READS	PF_READS	PCT_PF_READS	PF_NOISE_READS	PF_READS_ALIGNED	PCT_PF_READS_ALIGNED	PF_ALIGNED_BASES	PF_HQ_ALIGNED_READS	PF_HQ_ALIGNED_BASES	PF_HQ_ALIGNED_Q20_BASES	PF_HQ_MEDIAN_MISMATCHES	PF_MISMATCH_RATE	PF_HQ_ERROR_RATE	PF_INDEL_RATE	MEAN_READ_LENGTH	READS_ALIGNED_IN_PAIRS	PCT_READS_ALIGNED_IN_PAIRS	BAD_CYCLES	STRAND_BALANCE	PCT_CHIMERAS	PCT_ADAPTER
		AVERAGE	1.0133e+08	1.0133e+08	1	11.7162	1.0133e+08	1	1.02379e+10	9.88001e+07	9.98239e+09	9.51467e+09	0.0405405	0.0034431	0.00341537	8.46351e-05	101.03	9.20247e+07	0.906576	0.00540541	0.500651	0.00611506	0
mctp_sample_1	si_3936	2	106836220	106836220	1	8	106836220	1	10789533036	104698126	10573598533	10034751376	0	0.003101	0.00308	0.000113	101	93882768	0.878754	0	0.500725	0.006557	0
mctp_sample_2	si_3937	2	109842031	109842031	1	1	109842031	1	11093227159	107552972	10862042284	10326975640	0	0.002865	0.002855	0.000101	101	97536300	0.887969	0	0.501922	0.005374	0
mctp_sample_3	si_3938	2	108814703	108814703	1	13	108814703	1	10989492403	106722932	10778232643	10249182682	0	0.003024	0.003007	0.0001	101	96211766	0.88418	0	0.50137	0.00542	0
mctp_sample_4	si_3939	2	104815323	104815323	1	1	104815323	1	10585563740	102762992	10378286868	9899507054	0	0.002946	0.002913	0.000104	101	92932020	0.886626	0	0.501432	0.006123	0
mctp_sample_5	si_3940	2	106585799	106585799	1	1	106585799	1	10764334174	104671795	10571028347	10046912112	0	0.002862	0.002844	0.000109	101	95597872	0.89691	0	0.501915	0.005955	0
mctp_sample_6	si_3941	2	127739844	127739844	1	5	127739844	1	12900836956	124860385	12610022272	11955911322	0	0.002967	0.002926	0.0001	101	113914238	0.891767	0	0.501532	0.005509	0
mctp_sample_7	si_3942	2	95044461	95044461	1	3	95044461	1	9598714408	93226975	9415158027	8966121115	0	0.002994	0.002975	0.000112	101	85150042	0.895897	0	0.501676	0.007267	0
mctp_sample_8	si_3943	2	115967107	115967107	1	6	115967107	1	11711785198	114008108	11513936215	10966154253	0	0.002781	0.002771	0.000104	101	104201182	0.898541	0	0.500907	0.004401	0
mctp_sample_9	si_3944	2	105207959	105207959	1	3	105207959	1	10625199439	102401959	10341810554	9808671487	0	0.002936	0.002924	0.000104	101	93817606	0.891735	0	0.501211	0.005244	0
mctp_sample_10	si_3945	2	112105051	112105051	1	0	112105051	1	11321696374	109490685	11057656555	10533024336	0	0.002878	0.00284	0.000118	101	100213860	0.893928	0	0.50165	0.006114	0
mctp_sample_11	si_3946	2	124503623	124503623	1	1	124503623	1	12573832747	120038999	12122920103	11535079361	0	0.003131	0.003042	0.000116	101	110387676	0.886622	0	0.5017	0.010574	0
mctp_sample_12	si_3947	2	116673305	116673305	1	4	116673305	1	11783260137	114103917	11523763597	10994608439	0	0.003006	0.002978	9.1e-05	101	103943298	0.890892	0	0.501352	0.005519	0
mctp_sample_13	si_3948	2	139404787	139404787	1	3	139404787	1	14357503427	136150500	14022325241	13225425520	0	0.003945	0.00392	0.000114	103	119324358	0.855956	0	0.501449	0.00573	0
mctp_sample_14	si_3949	2	126562334	126562334	1	3	126562334	1	12781762965	124262493	12549489120	12012840628	0	0.002785	0.002767	0.000112	101	113886934	0.899849	0	0.500934	0.004775	0
mctp_sample_15	si_3950	2	124652715	124652715	1	5	124652715	1	12589027214	122261886	12347565553	11803226151	0	0.002835	0.002818	0.000101	101	112099706	0.899296	0	0.501728	0.00654	0
mctp_sample_16	si_3951	2	111968379	111968379	1	6	111968379	1	11307994984	110070728	11116341643	10619524164	0	0.002827	0.002815	0.0001	101	100286422	0.895667	0	0.501639	0.004569	0
mctp_sample_17	si_3952	2	118591005	118591005	1	6	118591005	1	11976748574	115618216	11676508992	11071346072	0	0.003308	0.003277	0.000112	101	102427158	0.863701	0	0.50302	0.006619	0
mctp_sample_18	si_3953	2	116730724	116730724	1	5	116730724	1	11788741824	114593393	11572885316	10982685387	0	0.003075	0.003056	0.000122	101	102102844	0.874687	0	0.501023	0.007195	0
mctp_sample_19	si_3954	2	113458773	113458773	1	9	113458773	1	11458316938	111450019	11255445682	10678687056	0	0.003207	0.003194	0.000121	101	98929012	0.871938	0	0.501573	0.005585	0
mctp_sample_20	si_3955	2	133126800	133126800	1	10	133126800	1	13444739404	130437698	13173153994	12686701985	0	0.002729	0.002713	0.000111	101	118661752	0.891344	0	0.501668	0.006144	0
mctp_sample_21	si_3956	2	113378275	113378275	1	2	113378275	1	11450299682	110911754	11201190878	10828437082	0	0.002608	0.002577	0.000109	101	101245568	0.892989	0	0.500865	0.006833	0
mctp_sample_22	si_3957	2	102888123	102888123	1	8	102888123	1	10390736533	100414581	10140922135	9798278507	0	0.002773	0.002752	0.000128	101	91816902	0.892396	0	0.50164	0.006132	0
mctp_sample_23	si_3958	2	114676484	114676484	1	4	114676484	1	11581537274	109117430	11020082767	10645698766	0	0.002912	0.002749	0.000129	101	101054282	0.881212	0	0.502169	0.01121	0
mctp_sample_24	si_3959	2	131249956	131249956	1	0	131249956	1	13255265417	127752644	12902047315	12374124509	0	0.002814	0.002776	0.000103	101	117850196	0.897907	0	0.502086	0.006997	0
mctp_sample_25	si_3960	2	114309872	114309872	1	9	114309872	1	11544512916	111063908	11216680892	10779534648	0	0.00293	0.002882	0.000101	101	102678064	0.898243	0	0.501105	0.006476	0
mctp_sample_26	si_3961	2	109612703	109612703	1	2	109612703	1	11070079110	107222252	10828654925	10384585314	0	0.002875	0.002862	9.9e-05	101	98540024	0.898984	0	0.501765	0.004442	0
mctp_sample_27	si_3962	2	117386844	117386844	1	9	117386844	1	11855339967	113946561	11507881888	10982867305	0	0.003105	0.003058	9.2e-05	101	103499476	0.881696	0	0.500824	0.007194	0
mctp_sample_28	si_3963	2	98255635	98255635	1	1	98255635	1	9923058277	96287157	9724252004	9196017026	0	0.003458	0.003433	0.000105	101	84365414	0.858632	0	0.500983	0.005475	0
mctp_sample_29	si_3964	2	125039302	125039302	1	7	125039302	1	12628254245	122714960	12393505512	11817000145	0	0.002879	0.002865	8.4e-05	101	111870440	0.894682	0	0.500869	0.004676	0
mctp_sample_30	si_3965	2	139586072	139586072	1	6	139586072	1	14097358044	137200594	13856433736	13172619745	0	0.002898	0.002889	8.3e-05	101	124732996	0.893592	0	0.501027	0.004603	0
mctp_sample_31	si_3966	2	88032640	88032640	1	5	88032640	1	8890717649	85096476	8594175480	8106139660	0	0.004386	0.004335	0.000101	101	74858296	0.850347	0	0.501791	0.008669	0
mctp_sample_32	si_3967	2	101104987	101104987	1	4	101104987	1	10210920436	96542746	9750143938	9224311335	0	0.003587	0.003473	0.000102	101	86369278	0.854253	0	0.50367	0.009024	0
mctp_sample_33	si_3969	2	125721559	125721559	1	0	125721559	1	12697020371	122676730	12389502528	11800224258	0	0.002783	0.002763	9.7e-05	101	112372696	0.893822	0	0.501814	0.005197	0
mctp_sample_34	si_3970	2	133560287	133560287	1	4	133560287	1	13488776526	130724867	13202408285	12719870310	0	0.002638	0.002616	9.1e-05	101	122045146	0.913783	0	0.50067	0.004988	0
mctp_sample_35	si_3971	2	121257920	121257920	1	3	121257920	1	12246096913	118489583	11966506894	11553244401	0	0.002635	0.002607	0.00011	101	110765604	0.913471	0	0.500825	0.007305	0
mctp_sample_36	si_3972	2	130745514	130745514	1	8	130745514	1	13204209551	127646654	12891236854	12412965301	0	0.002641	0.002614	0.000114	101	118315280	0.904928	0	0.501189	0.006628	0
mctp_sample_37	si_3973	2	140713195	140713195	1	3	140713195	1	14210832112	137652443	13901708900	13401739390	0	0.002658	0.002633	0.000119	101	127308892	0.90474	0	0.500779	0.005387	0
mctp_sample_38	si_3974	2	126909564	126909564	1	0	126909564	1	12816925554	124299809	12553353650	12096987329	0	0.002577	0.002561	0.000104	101	113706480	0.895965	0	0.501023	0.005857	0
mctp_sample_39	si_3975	2	120052720	120052720	1	5	120052720	1	12124391692	117503309	11866911821	11441364479	0	0.002512	0.002482	0.000107	101	109642276	0.913284	0	0.501616	0.006003	0
mctp_sample_40	si_3976	2	141518105	141518105	1	3	141518105	1	14575424682	137691016	14181249496	13240725614	0	0.004399	0.004371	9.3e-05	103	117755924	0.832091	0	0.502136	0.00723	0
mctp_sample_41	si_3977	2	124962437	124962437	1	3	124962437	1	12620485496	121643372	12285270395	11808721082	0	0.002909	0.002869	8.8e-05	101	108459930	0.86794	0	0.501675	0.006549	0
mctp_sample_42	si_3981	2	137570566	137570566	1	3	137570566	1	13893575327	135458041	13680220976	13134069923	0	0.002746	0.00273	0.000108	101	123992022	0.901298	0	0.501505	0.004358	0
mctp_sample_43	si_4156	2	103827393	103827393	1	4	103827393	1	10486110298	101491735	10250215160	9575384695	0	0.003782	0.003771	7.1e-05	101	85422836	0.822739	0	0.501481	0.003994	0
mctp_sample_44	si_4157	2	101900428	101900428	1	8	101900428	1	10291345690	99934169	10092761665	9458343753	0	0.003786	0.003775	8.6e-05	101	83868556	0.823044	0	0.49992	0.004704	0
mctp_sample_45	si_4158	2	95357370	95357370	1	1	95357370	1	9630682436	92953236	9387871203	8759729813	0	0.003808	0.003798	7e-05	101	78437958	0.822568	0	0.50013	0.003784	0
mctp_sample_46	si_4159	2	108607909	108607909	1	6	108607909	1	10968991008	105323975	10637320409	9367252442	0	0.004512	0.004494	6.4e-05	101	97484488	0.897582	0	0.500335	0.004649	0
mctp_sample_47	si_4160	2	96822774	96822774	1	6	96822774	1	9778537596	95195815	9614221296	8427785222	0	0.004658	0.004646	8.5e-05	101	86321088	0.891537	0	0.500336	0.006407	0
mctp_sample_48	si_4161	2	98470854	98470854	1	4	98470854	1	9945071930	96694608	9765676645	8602138820	0	0.00446	0.004449	7.7e-05	101	88665650	0.900425	0	0.50039	0.004906	0
mctp_sample_49	si_3909	2	135935435	135935435	1	9	135935435	1	13728705216	132743333	13406316491	12540982188	0	0.00346	0.003445	8.2e-05	101	118566976	0.87223	0	0.501661	0.006392	0
mctp_sample_50	si_3910	2	139291301	139291301	1	45	139291301	1	14067580557	135827041	13717703114	12656652619	0	0.00359	0.003576	8.7e-05	101	120296402	0.863632	0	0.502065	0.005493	0
mctp_sample_51	si_4472	2	91418979	91418979	1	3	91418979	1	9232990223	89469882	9036136945	8554593856	0	0.00293	0.002919	6.1e-05	101	85688296	0.937314	0	0.500581	0.00497	0
mctp_sample_52	si_4448	2	51393347	51393347	1	0	51393347	1	5190568080	50571441	5107557151	4928659888	0	0.002333	0.00232	5.6e-05	101	49102980	0.955435	0	0.500303	0.004966	0
mctp_sample_53	si_4449	2	67965407	67965407	1	2	67965407	1	6864268753	66378059	6703949504	6446583459	0	0.002503	0.002496	5.6e-05	101	64756956	0.952793	0	0.500431	0.004425	0
mctp_sample_54	si_4450	2	55390879	55390879	1	0	55390879	1	5594267704	54521940	5506506918	5280969447	0	0.002648	0.002639	6e-05	101	52563330	0.948953	0	0.500222	0.003685	0
mctp_sample_55	si_4451	2	68682685	68682685	1	0	68682685	1	6936743726	64942186	6558957712	6290486723	0	0.003065	0.002928	6.6e-05	101	63825860	0.929286	0	0.50198	0.012145	0
mctp_sample_56	si_4473	2	79804682	79804682	1	2	79804682	1	8060021960	75336689	7608759237	7186844741	0	0.003525	0.003372	6.9e-05	101	72751516	0.91162	0	0.502142	0.013238	0
mctp_sample_57	si_4474	2	75376289	75376289	1	3	75376289	1	7612751642	73620209	7435390693	7036248348	0	0.003116	0.00309	6e-05	101	70219818	0.93159	0	0.500784	0.005311	0
mctp_sample_58	si_4475	2	80340882	80340882	1	0	80340882	1	8114158063	78499335	7928164379	7457461641	0	0.003833	0.003807	6.3e-05	101	73553778	0.915521	0	0.501743	0.003503	0
mctp_sample_59	si_4476	2	61864448	61864448	1	0	61864448	1	6248094203	60817166	6142321472	5837391711	0	0.003317	0.003306	6.3e-05	101	55705894	0.900451	0	0.500812	0.004799	0
mctp_sample_60	si_4477	2	54682006	54682006	1	1	54682006	1	5522694816	53544641	5407823263	5097628259	0	0.003773	0.003757	6.2e-05	101	50529102	0.924054	0	0.501196	0.005095	0
mctp_sample_61	si_5001	2	181768273	181768273	1	12	181768273	1	18357818994	178215539	17999003106	17369559793	0	0.003127	0.003109	6.9e-05	101	170845466	0.939908	0	0.500555	0.004872	0
mctp_sample_62	si_5002	2	164986733	164986733	1	23	164986733	1	16662647464	161912746	16352186285	15855077173	0	0.002152	0.00214	9e-05	101	157188790	0.952736	0	0.50036	0.004314	0
mctp_sample_63	si_5003	2	152003135	152003135	1	12	152003135	1	15351553165	148515294	14999293474	14577286973	0	0.001945	0.001922	7.8e-05	101	146167414	0.961608	0	0.500053	0.006225	0
mctp_sample_64	si_5353	2	75400136	75400136	1	1	75400136	1	7614719583	73445617	7417328046	6882252838	1	0.009689	0.009677	0.00011	101	43282784	0.574041	0	0.50597	0.00501	0
mctp_sample_65	si_5352	2	57587582	57587582	1	0	57587582	1	5815926636	55777707	5633137619	5218345099	1	0.009809	0.009779	9.1e-05	101	32244164	0.559915	0	0.504005	0.006665	0
mctp_sample_66	si_5192	2	158592220	158592220	1	16	158592220	1	16017169921	155060966	15660524308	15127074239	0	0.003602	0.003587	6.2e-05	101	151842272	0.957438	0	0.500062	0.004618	0
mctp_sample_67	si_5285	2	154650999	154650999	1	12	154650999	1	15619181451	152001309	15351569802	14442843010	1	0.006748	0.006739	5.4e-05	101	143017434	0.924775	0	0.499885	0.004555	0
mctp_sample_68	si_5486	2	103414473	103414473	1	4	103414473	1	10444518754	100008075	10100479241	9666529436	0	0.002218	0.002204	4.8e-05	101	94690886	0.915644	0	0.500351	0.006595	0
mctp_sample_72	si_4504	2	91945893	91945893	1	259	91945893	1	9286077546	90158381	9105544489	8425005874	0	0.004422	0.004397	7.1e-05	101	83946326	0.912997	0	0.500285	0.00495	0
mctp_sample_73	si_4505	2	86476472	86476472	1	1	86476472	1	8733739845	84640500	8548313209	7908929934	0	0.004391	0.004371	6.4e-05	101	79188722	0.915726	0	0.500416	0.004482	0
mctp_sample_74	si_4506	2	88507614	88507614	1	1	88507614	1	8938685758	86208898	8706523868	8029019794	0	0.004686	0.004662	9.1e-05	101	80119026	0.905222	0	0.500874	0.005141	0
mctp_sample_75	si_4386	2	111472365	111472365	1	2	111472365	1	11257798469	108713097	10979124090	10363596283	0	0.003564	0.00352	0.000119	101	99573874	0.893261	0	0.501013	0.006437	0
mctp_sample_76	si_4385	2	85412449	85412449	1	4	85412449	1	8626121031	82925470	8374944374	7949191142	0	0.003541	0.003496	0.000102	101	76913426	0.900494	0	0.501989	0.006276	0
mctp_sample_77	si_4507	2	83325865	83325865	1	64	83325865	1	8415525747	81207777	8201604022	7425552351	0	0.005337	0.005314	6.6e-05	101	73836458	0.886117	0	0.501054	0.004145	0
mctp_sample_78	si_4384	2	91284185	91284185	1	1	91284185	1	9218964773	89498813	9038650294	8623126014	0	0.003182	0.003157	0.000113	101	83228178	0.911748	0	0.50102	0.005261	0
mctp_sample_79	si_4508	2	88985741	88985741	1	5	88985741	1	8987075336	85739464	8659208789	7867072893	0	0.005449	0.005389	8e-05	101	78193170	0.878716	0	0.501968	0.006623	0
mctp_sample_80	si_4509	2	88113417	88113417	1	1	88113417	1	8899015027	83682148	8451464033	7659590166	0	0.005561	0.005479	7e-05	101	76238022	0.865226	0	0.500075	0.009545	0
mctp_sample_82	si_4951	2	86298266	86298266	1	5	86298266	1	8715753752	83918796	8475431923	8031238456	0	0.004386	0.004347	9.5e-05	101	77500938	0.898059	0	0.500605	0.004803	0
mctp_sample_81	si_4383	2	112839845	112839845	1	9	112839845	1	11395954181	110337782	11143255637	10624767993	0	0.003263	0.00323	0.000109	101	102463336	0.908042	0	0.500333	0.005524	0
mctp_sample_83	si_4510	2	88891000	88891000	1	783	88891000	1	8977424492	86835007	8769778360	8234738078	0	0.003528	0.003492	9.3e-05	101	81764834	0.919833	0	0.50092	0.006744	0
mctp_sample_84	si_4511	2	89078398	89078398	1	2	89078398	1	8996306531	86260049	8711663224	8165372749	0	0.003694	0.00362	0.000107	101	81505964	0.914991	0	0.501127	0.007658	0
mctp_sample_85	si_4623	2	84229176	84229176	1	4	84229176	1	8506814064	82275302	8309477553	7919115435	0	0.002959	0.002945	6.7e-05	101	78873244	0.936412	0	0.500754	0.005958	0
mctp_sample_86	si_4512	2	108514151	108514151	1	3	108514151	1	10959237734	105245405	10629103620	10025257955	0	0.003486	0.003415	9.5e-05	101	100423438	0.925441	0	0.500103	0.005798	0
mctp_sample_87	si_4513	2	87066538	87066538	1	3	87066538	1	8793172312	84569444	8540972826	8048945353	0	0.003464	0.003416	9.6e-05	101	80192886	0.921053	0	0.500184	0.006303	0
mctp_sample_88	si_4514	2	75112882	75112882	1	3	75112882	1	7585882665	73299109	7402698150	6968704097	0	0.003508	0.00347	9.8e-05	101	69176770	0.920971	0	0.500764	0.007458	0
mctp_sample_89	si_4870	2	134072088	134072088	1	21	134072088	1	13540396766	131212119	13251557274	12498813093	0	0.002745	0.002729	8.1e-05	101	125756972	0.93798	0	0.500034	0.004356	0
mctp_sample_90	si_4515	2	107020745	107020745	1	10	107020745	1	10808481373	104897899	10594082721	9983221766	0	0.003292	0.003272	8.3e-05	101	99533252	0.930037	0	0.500676	0.004374	0
mctp_sample_92	si_4952	2	94791899	94791899	1	6	94791899	1	9573455443	92857462	9378083770	8952679680	0	0.004193	0.00418	0.000116	101	86596958	0.913548	0	0.500397	0.004709	0
mctp_sample_91	si_4520	2	73907439	73907439	1	254	73907439	1	7464350103	71938380	7265479426	7065829945	0	0.002286	0.002238	7.4e-05	101	70146980	0.949119	0	0.50264	0.008675	0
mctp_sample_94	si_4953	2	77033793	77033793	1	3	77033793	1	7779965867	75603780	7635539552	7271628416	0	0.004208	0.004194	0.000112	101	70178510	0.911009	0	0.500624	0.003412	0
mctp_sample_93	si_4521	2	86812212	86812212	1	2	86812212	1	8767721537	85072775	8592042948	8409785886	0	0.001995	0.001966	7e-05	101	83222880	0.958654	0	0.500629	0.006876	0
mctp_sample_95	si_4522	2	82130770	82130770	1	2	82130770	1	8294858691	80199261	8099781397	7877858628	0	0.002142	0.002124	7.4e-05	101	78537082	0.956244	0	0.500391	0.004835	0
mctp_sample_96	si_4390	2	102667573	102667573	1	2	102667573	1	10368688174	99667641	10065704169	9557917248	0	0.003421	0.003371	0.000112	101	92217278	0.898212	0	0.501104	0.006939	0
mctp_sample_97	si_4389	2	153075481	153075481	1	10	153075481	1	15459283297	150294951	15178467982	14256536918	0	0.003521	0.003505	0.000116	101	136743348	0.893307	0	0.500525	0.004228	0
mctp_sample_98	si_4388	2	83696689	83696689	1	8	83696689	1	8452736686	81996247	8280999703	7802211761	0	0.003411	0.003377	0.000108	101	74816508	0.8939	0	0.501009	0.005391	0
mctp_sample_99	si_4387	2	73691310	73691310	1	8	73691310	1	7442212986	72079929	7279473031	6849944608	0	0.003436	0.00341	0.000117	101	66032496	0.896069	0	0.500438	0.005997	0
mctp_sample_100	si_4523	2	86741697	86741697	1	210	86741697	1	8760632359	85194846	8604404494	8334648125	0	0.003281	0.003261	5.6e-05	101	81893558	0.944108	0	0.500151	0.006204	0
mctp_sample_101	si_4540	2	89297939	89297939	1	1	89297939	1	9018716205	86081742	8693886263	8435500024	0	0.002492	0.002415	9.8e-05	101	84170806	0.942584	0	0.501054	0.008678	0
mctp_sample_102	si_4541	2	106728471	106728471	1	18	106728471	1	10779120643	104564469	10560562868	10255727594	0	0.002251	0.002227	7.5e-05	101	102419964	0.959631	0	0.500471	0.005976	0
mctp_sample_103	si_4394	2	94241767	94241767	1	15	94241767	1	9517624685	91740898	9265047986	8798066498	0	0.004106	0.004072	0.000125	101	84943806	0.901339	0	0.500684	0.006398	0
mctp_sample_104	si_4542	2	100066578	100066578	1	10	100066578	1	10106439491	94593193	9553632952	9220597554	0	0.002731	0.002624	8.2e-05	101	93574316	0.935121	0	0.502093	0.011525	0
mctp_sample_105	si_4543	2	109857705	109857705	1	7	109857705	1	11095246268	104870828	10591577330	10261341655	0	0.002606	0.0025	6.9e-05	101	103064898	0.938167	0	0.502136	0.010466	0
mctp_sample_106	si_4954	2	103067960	103067960	1	0	103067960	1	10409433205	99609168	10060102263	9559238623	0	0.00402	0.003981	7e-05	101	93869130	0.91075	0	0.50012	0.005996	0
mctp_sample_107	si_4544	2	97377274	97377274	1	0	97377274	1	9834714533	94932359	9587786874	9299861023	0	0.002237	0.002177	8e-05	101	92286746	0.947724	0	0.500528	0.011743	0
mctp_sample_108	si_4545	2	121099912	121099912	1	8	121099912	1	12230638439	116835384	11799927730	11398063592	0	0.00246	0.002392	7.6e-05	101	114603436	0.946354	0	0.50101	0.008254	0
mctp_sample_109	si_4546	2	105498942	105498942	1	11	105498942	1	10655022119	101366210	10237624001	9846934198	0	0.002626	0.002536	9.3e-05	101	99327598	0.941503	0	0.501056	0.009269	0
mctp_sample_110	si_4392	2	96649983	96649983	1	6	96649983	1	9760854395	94461276	9539805486	9068575103	0	0.003384	0.00335	0.000127	101	87638570	0.906762	0	0.500932	0.005244	0
mctp_sample_111	si_4391	2	90111026	90111026	1	5	90111026	1	9100495413	86387826	8724463315	8270543792	0	0.003912	0.003828	0.000141	101	79745896	0.884974	0	0.499544	0.009253	0
mctp_sample_112	si_4547	2	80996194	80996194	1	3	80996194	1	8180301123	79109598	7989759118	7426196711	0	0.004298	0.004268	7e-05	101	73180178	0.903501	0	0.500082	0.005416	0
mctp_sample_113	si_4548	2	94513126	94513126	1	13	94513126	1	9545490545	91488784	9240037247	8655258962	0	0.003655	0.003592	7.4e-05	101	85822390	0.908047	0	0.500323	0.007738	0
mctp_sample_114	si_4549	2	101130934	101130934	1	9	101130934	1	10213772280	98650184	9963223226	9374682003	0	0.003483	0.003444	8.4e-05	101	93259486	0.922166	0	0.500382	0.005753	0
mctp_sample_115	si_4575	2	83484131	83484131	1	2	83484131	1	8431465054	81933353	8274842589	7746793621	0	0.003731	0.003706	8.5e-05	101	76265608	0.913534	0	0.500115	0.005987	0
mctp_sample_116	si_4398	2	102063106	102063106	1	5	102063106	1	10307543304	99823386	10081342255	9582230200	0	0.003483	0.003457	0.000131	101	92348702	0.90482	0	0.500868	0.004892	0
mctp_sample_117	si_4577	2	85869501	85869501	1	7	85869501	1	8672370326	84059319	8489547773	7937781407	0	0.004363	0.004334	8.6e-05	101	78554392	0.914811	0	0.500078	0.005327	0
mctp_sample_118	si_4578	2	79428220	79428220	1	1	79428220	1	8021929592	77481115	7825277613	7357155045	0	0.00368	0.003643	7e-05	101	73275468	0.922537	0	0.499736	0.008218	0
mctp_sample_119	si_4397	2	92362832	92362832	1	8	92362832	1	9327881308	88803126	8968363875	8517980638	0	0.003926	0.003838	0.00015	101	82135188	0.889267	0	0.5011	0.008698	0
mctp_sample_120	si_4579	2	79344189	79344189	1	11	79344189	1	8013511716	74762082	7550722861	7056086445	0	0.003954	0.003827	8.9e-05	101	71180690	0.897113	0	0.50008	0.008166	0
mctp_sample_121	si_4396	2	91107805	91107805	1	11	91107805	1	9201062618	89278553	9016319038	8571549802	0	0.003462	0.003443	0.00014	101	82347188	0.903843	0	0.500786	0.004825	0
mctp_sample_122	si_4580	2	93687454	93687454	1	1	93687454	1	9462120872	89242846	9013221336	8432182220	0	0.003897	0.003778	0.0001	101	85028068	0.907572	0	0.502873	0.009301	0
mctp_sample_123	si_4581	2	88028489	88028489	1	1	88028489	1	8890459292	85910659	8676564649	8265883260	0	0.003122	0.003093	7.9e-05	101	81592788	0.926891	0	0.49996	0.005872	0
mctp_sample_124	si_4582	2	87172322	87172322	1	216	87172322	1	8804019799	84688615	8553172242	8145625259	0	0.003177	0.003131	8e-05	101	80443018	0.922805	0	0.500574	0.008552	0
mctp_sample_125	si_4583	2	92912917	92912917	1	2	92912917	1	9383831155	91046169	9195295560	8762348008	0	0.002976	0.002958	7.3e-05	101	86523810	0.931236	0	0.500148	0.005081	0
mctp_sample_126	si_4395	2	92678745	92678745	1	7	92678745	1	9359762376	90385501	9128156729	8661005685	0	0.004186	0.004149	0.000139	101	83062578	0.896242	0	0.501512	0.006164	0
mctp_sample_127	si_4584	2	85196961	85196961	1	5	85196961	1	8604551115	83430341	8426127906	8025886097	0	0.003078	0.003054	7.2e-05	101	79279520	0.930544	0	0.500597	0.006055	0
mctp_sample_128	si_4585	2	89418534	89418534	1	4	89418534	1	9030845487	87532454	8840357268	8428397472	0	0.003147	0.003121	8.1e-05	101	83315230	0.931745	0	0.500044	0.005647	0
mctp_sample_129	si_4586	2	80254476	80254476	1	0	80254476	1	8105397823	77731763	7850609395	7366162059	0	0.003578	0.003521	7.5e-05	101	73839314	0.920065	0	0.500554	0.006523	0
mctp_sample_130	si_4411	2	74643150	74643150	1	2	74643150	1	7538437465	72158348	7287479150	6977280705	0	0.00377	0.003704	0.000111	101	65572500	0.87848	0	0.499387	0.006716	0
mctp_sample_131	si_4412	2	77730366	77730366	1	1	77730366	1	7850245802	75172965	7591956136	7286395896	0	0.003554	0.0035	0.000108	101	68553744	0.881943	0	0.499462	0.009	0
mctp_sample_132	si_4413	2	66437486	66437486	1	2	66437486	1	6709745129	65171341	6581870178	6302598637	0	0.003547	0.003529	0.0001	101	59083170	0.889305	0	0.500438	0.004495	0
mctp_sample_133	si_4414	2	93778746	93778746	1	57	93778746	1	9470920461	91162774	9206716341	8811938190	0	0.003464	0.003412	0.00012	101	85286860	0.909448	0	0.500473	0.005533	0
mctp_sample_134	si_4415	2	75922282	75922282	1	2	75922282	1	7667661669	73495193	7422532915	7102598785	0	0.00355	0.003483	0.000107	101	68478832	0.90196	0	0.502696	0.008118	0
mctp_sample_135	si_4416	2	88456705	88456705	1	3	88456705	1	8933431274	86585431	8744441058	8356543742	0	0.00343	0.003408	0.00012	101	80794716	0.913381	0	0.500992	0.005741	0
mctp_sample_136	si_4417	2	89924218	89924218	1	6	89924218	1	9081697481	88179418	8905480802	8420131408	0	0.003654	0.003635	0.000107	101	81041872	0.901224	0	0.500706	0.00473	0
mctp_sample_137	si_4418	2	88899207	88899207	1	2	88899207	1	8978136576	86924642	8778714313	8281329708	0	0.003823	0.0038	0.000115	101	79613486	0.895548	0	0.501154	0.004729	0
mctp_sample_138	si_4419	2	95314780	95314780	1	3	95314780	1	9626110089	93564812	9449371602	8878437438	0	0.003967	0.003944	0.000108	101	87066156	0.913459	0	0.50014	0.005087	0
mctp_sample_139	si_4420	2	88795410	88795410	1	5	88795410	1	8967715754	86640061	8750032897	8233225619	0	0.004481	0.004447	0.000101	101	81012734	0.912353	0	0.499745	0.005541	0
mctp_sample_140	si_4421	2	88191669	88191669	1	3	88191669	1	8906722368	86304968	8716175318	8230287204	0	0.004298	0.004273	0.000107	101	81225278	0.921009	0	0.500053	0.006696	0
mctp_sample_141	si_4422	2	88408841	88408841	1	2	88408841	1	8928679174	86093783	8694865497	8170494706	0	0.004544	0.004502	0.00011	101	80280468	0.908059	0	0.499743	0.005742	0
mctp_sample_142	si_4955	2	89158638	89158638	1	3	89158638	1	9004606366	86228970	8708717050	8295781917	0	0.002982	0.002926	8.3e-05	101	81145542	0.910125	0	0.500354	0.006954	0
mctp_sample_143	si_4906	2	103639009	103639009	1	3	103639009	1	10467023260	101143563	10214990808	9741205345	0	0.003927	0.0039	7.8e-05	101	94348696	0.910359	0	0.499845	0.005145	0
mctp_sample_144	si_4908	2	100798196	100798196	1	22	100798196	1	10180343588	98409619	9939101073	9482455390	0	0.00289	0.002865	4.8e-05	101	87849954	0.871543	0	0.499637	0.004472	0
mctp_sample_145	si_4717	2	81326806	81326806	1	1	81326806	1	8213744494	79569302	8036240237	7612872861	0	0.005967	0.005954	5.4e-05	101	74834602	0.920171	0	0.500519	0.004833	0
mctp_sample_146	si_4718	2	87785120	87785120	1	0	87785120	1	8866008920	86077800	8693572622	8262449531	0	0.004092	0.004086	5.7e-05	101	81180412	0.924763	0	0.500936	0.003328	0
mctp_sample_147	si_4719	2	96611815	96611815	1	0	96611815	1	9757494815	94436125	9537753569	9061129541	0	0.004112	0.004104	5.4e-05	101	88890270	0.920077	0	0.50112	0.005467	0
mctp_sample_148	si_4530	2	110134906	110134906	1	5	110134906	1	11123147437	108352273	10943107207	10615893607	0	0.002063	0.002045	7.2e-05	101	106112816	0.96348	0	0.500109	0.007136	0
mctp_sample_149	si_4624	2	92208713	92208713	1	0	92208713	1	9312784629	89826118	9072146458	8706216312	0	0.003412	0.003391	6.1e-05	101	80049020	0.868129	0	0.500869	0.004507	0
mctp_sample_150	si_4633	2	110349491	110349491	1	1	110349491	1	11144925437	108337115	10941680029	10441536795	0	0.003334	0.003319	5.6e-05	101	101691488	0.92154	0	0.50038	0.006969	0
mctp_sample_151	si_4527	2	94506303	94506303	1	4	94506303	1	9544722784	93093740	9402058223	9117684201	0	0.002452	0.00244	6.7e-05	101	83431172	0.882811	0	0.500391	0.005835	0
mctp_sample_152	si_4529	2	100011253	100011253	1	2	100011253	1	10100780875	98031178	9900796871	9613413100	0	0.002826	0.002817	6.2e-05	101	95086028	0.950753	0	0.500346	0.005571	0
mctp_sample_153	si_4628	2	81872611	81872611	1	0	81872611	1	8268961269	80393595	8119582933	7542144163	1	0.007228	0.007217	3.4e-05	101	71868352	0.877807	0	0.500285	0.005393	0
mctp_sample_154	si_4526	2	95213898	95213898	1	0	95213898	1	9616291960	93696547	9463043076	9184748335	0	0.002391	0.002379	5.8e-05	101	83938234	0.881575	0	0.500477	0.006335	0
mctp_sample_155	si_4632	2	92362532	92362532	1	3	92362532	1	9328337701	90658235	9156206378	8762015946	0	0.003424	0.003408	5.1e-05	101	81059304	0.877621	0	0.500845	0.004887	0
mctp_sample_156	si_4629	2	81529502	81529502	1	3	81529502	1	8234258700	79915808	8071279441	7572801906	0	0.007063	0.007045	4.7e-05	101	71989464	0.882987	0	0.500332	0.007804	0
mctp_sample_157	si_4630	2	71891690	71891690	1	156	71891690	1	7260874972	70333460	7103496094	6659186225	0	0.007079	0.007066	4.7e-05	101	62811972	0.873703	0	0.50078	0.005436	0
mctp_sample_158	si_4903	2	129598115	129598115	1	5	129598115	1	13089139098	126728748	12799338782	12145662141	0	0.003468	0.003456	3.4e-05	101	119657390	0.923296	0	0.500136	0.004555	0
mctp_sample_159	si_4631	2	86765115	86765115	1	14	86765115	1	8762994068	85187689	8603677492	8297640370	0	0.002519	0.002496	6e-05	101	79873902	0.920576	0	0.499762	0.007787	0
mctp_sample_160	si_4528	2	82859625	82859625	1	4	82859625	1	8368438150	81470801	8228170822	7970385824	0	0.002546	0.002538	6.9e-05	101	73004698	0.881065	0	0.500477	0.005109	0
mctp_sample_161	si_4524	2	97859400	97859400	1	1	97859400	1	9883491675	96035973	9699330518	9394877779	0	0.003231	0.003212	5.3e-05	101	92683644	0.94711	0	0.500199	0.008238	0
mctp_sample_162	si_4525	2	116554707	116554707	1	2	116554707	1	11771644200	114642071	11578472741	11190043005	0	0.003223	0.00321	5.6e-05	101	110347780	0.946747	0	0.500553	0.00664	0
mctp_sample_163	si_4625	2	72113752	72113752	1	0	72113752	1	7283248400	70543186	7124624056	6764151168	0	0.004175	0.004167	5.8e-05	101	60328526	0.836574	0	0.500532	0.004237	0
mctp_sample_164	si_4531	2	122971919	122971919	1	16	122971919	1	12419695672	120337406	12153617505	11803592975	0	0.001994	0.001979	6.4e-05	101	118870782	0.96665	0	0.500146	0.007048	0
mctp_sample_165	si_4909	2	112835811	112835811	1	4	112835811	1	11396002686	110658860	11176136250	10656996551	0	0.00276	0.002747	5.7e-05	101	98564106	0.873518	0	0.500417	0.005373	0
mctp_sample_166	si_4869	2	91621375	91621375	1	40	91621375	1	9253133449	89792231	9068402064	8527543731	0	0.002917	0.002904	8.6e-05	101	85396300	0.932057	0	0.500022	0.004818	0
mctp_sample_167	si_4627	2	101388683	101388683	1	2	101388683	1	10239942373	99486541	10047829874	9385078221	0	0.003698	0.003683	5e-05	101	93844456	0.925591	0	0.50071	0.006991	0
mctp_sample_168	si_4622	2	92756671	92756671	1	2	92756671	1	9368128096	90886067	9179201394	8793701734	0	0.003417	0.003388	5.5e-05	101	81541076	0.879086	0	0.501127	0.007234	0
mctp_sample_169	si_4905	2	128358709	128358709	1	0	128358709	1	12963973055	124930180	12617696135	12010706499	0	0.003991	0.003958	3.9e-05	101	117000030	0.911508	0	0.499672	0.00484	0
mctp_sample_171	si_4715	2	82642248	82642248	1	4	82642248	1	8346630425	79123576	7991248072	7546938867	0	0.006536	0.006465	6.8e-05	101	73171240	0.885398	0	0.499629	0.011643	0
mctp_sample_172	si_4716	2	70240933	70240933	1	4	70240933	1	7094158737	65344455	6599616907	6215440887	0	0.006879	0.00674	7.6e-05	101	59898518	0.852758	0	0.497195	0.011511	0
mctp_sample_170	si_4708	2	80874634	80874634	1	7	80874634	1	8168076955	79199093	7998850628	7569496087	0	0.004307	0.004294	6e-05	101	66636750	0.823951	0	0.501782	0.004695	0
mctp_sample_173	si_4709	2	83239173	83239173	1	0	83239173	1	8406895014	78734271	7951903276	7568792034	0	0.004463	0.004342	6.2e-05	101	67439202	0.810186	0	0.494136	0.010248	0
mctp_sample_174	si_4710	2	69564746	69564746	1	0	69564746	1	7025828077	65613968	6626802691	6232995299	0	0.004489	0.00436	7.1e-05	101	55740450	0.801274	0	0.494007	0.008558	0
mctp_sample_175	si_4711	2	71116940	71116940	1	0	71116940	1	7182510951	69058030	6974566905	6713398682	0	0.004324	0.004279	7.9e-05	101	65333836	0.918682	0	0.500228	0.006795	0
mctp_sample_176	si_4713	2	85060806	85060806	1	0	85060806	1	8590839887	82570736	8339347534	7815793547	0	0.004417	0.004363	8e-05	101	69603574	0.81828	0	0.497867	0.006371	0
mctp_sample_178	si_4790	2	110105931	110105931	1	9	110105931	1	11119895802	107297652	10836269429	10478896931	0	0.002607	0.002576	0.00012	101	104486064	0.948959	0	0.500237	0.006588	0
mctp_sample_177	si_4714	2	75719490	75719490	1	1	75719490	1	7647400530	74007721	7474514777	6995419702	0	0.004409	0.004375	7e-05	101	61935544	0.81796	0	0.498021	0.004543	0
mctp_sample_179	si_4873	2	106849187	106849187	1	5	106849187	1	10791401337	104842579	10588739971	10029517261	0	0.002834	0.002814	6e-05	101	99495818	0.93118	0	0.50038	0.004973	0
mctp_sample_180	si_4796	2	111942283	111942283	1	4	111942283	1	11305602169	109336885	11042464278	10652281298	0	0.002436	0.002401	8.7e-05	101	106234892	0.949015	0	0.500326	0.00637	0
mctp_sample_181	si_4874	2	104648292	104648292	1	3	104648292	1	10569085815	102226877	10324529075	9804167777	0	0.0028	0.002755	6.6e-05	101	97169492	0.928534	0	0.500478	0.006941	0
mctp_sample_182	si_4797	2	114979078	114979078	1	3	114979078	1	11612496866	107571406	10864329127	10492261671	0	0.002757	0.002599	0.0001	101	105571070	0.918176	0	0.50552	0.014176	0
mctp_sample_183	si_4875	2	102195953	102195953	1	12	102195953	1	10321414010	99589224	10058141397	9528645641	0	0.002784	0.002749	6.3e-05	101	95052436	0.9301	0	0.50027	0.006974	0
mctp_sample_185	si_4798	2	100357329	100357329	1	4	100357329	1	10135494140	96888951	9785198752	9438560060	0	0.002584	0.0025	9.4e-05	101	94463484	0.941271	0	0.500773	0.010633	0
mctp_sample_186	si_4799	2	107116596	107116596	1	2	107116596	1	10818333568	104386767	10542627675	10079379578	0	0.004076	0.004039	7.4e-05	101	99412116	0.928074	0	0.501009	0.008839	0
mctp_sample_187	si_4800	2	97914896	97914896	1	2	97914896	1	9888998119	94661966	9560458655	9107258120	0	0.004358	0.004297	8.9e-05	101	89735472	0.916464	0	0.501405	0.008463	0
mctp_sample_188	si_4876	2	87326212	87326212	1	3	87326212	1	8819241180	83657138	8448684522	7987469017	0	0.00374	0.003643	0.000117	101	79091044	0.905696	0	0.501566	0.007549	0
mctp_sample_189	si_4877	2	175989136	175989136	1	6	175989136	1	17773595793	171780695	17348573301	16360753069	0	0.003478	0.003455	9.1e-05	101	163806842	0.930778	0	0.500866	0.005978	0
mctp_sample_190	si_4892	2	84116233	84116233	1	8	84116233	1	8495512522	81691284	8250596900	8009448764	0	0.002554	0.002507	5.6e-05	101	79244910	0.942088	0	0.500678	0.006316	0
mctp_sample_191	si_4889	2	88236256	88236256	1	8	88236256	1	8911112044	86162393	8701669218	8215428391	0	0.003508	0.003482	0.000105	101	82174096	0.931296	0	0.5007	0.007241	0
mctp_sample_192	si_4890	2	106691544	106691544	1	3	106691544	1	10775622495	102089131	10310783840	10017719450	0	0.002674	0.002595	5.1e-05	101	99724948	0.934703	0	0.501829	0.006906	0
mctp_sample_193	si_4891	2	55623784	55623784	1	2	55623784	1	5617875199	53826530	5436355052	5276323752	0	0.002505	0.00245	5e-05	101	52357558	0.94128	0	0.500865	0.008783	0
mctp_sample_184	si_4791	2	97899574	97899574	1	4	97899574	1	9887458409	95613143	9656534046	9362857886	0	0.002246	0.002209	7.3e-05	101	93812976	0.958257	0	0.50053	0.007104	0
mctp_sample_194	si_4893	2	80577385	80577385	1	6	80577385	1	8138091532	78424469	7920650736	7531241997	0	0.005915	0.005882	5.2e-05	101	72809714	0.9036	0	0.504187	0.006323	0
mctp_sample_195	si_4894	2	87556686	87556686	1	3	87556686	1	8843010125	85593772	8644760728	8216525434	0	0.005782	0.005767	4.1e-05	101	79939164	0.912999	0	0.501384	0.005437	0
mctp_sample_196	si_4895	2	79957653	79957653	1	5	79957653	1	8075417590	78006205	7878325720	7500095355	0	0.005907	0.005892	6.1e-05	101	72949500	0.912352	0	0.501851	0.003891	0
mctp_sample_197	si_4896	2	76541140	76541140	1	3	76541140	1	7730413566	74634256	7537823453	7175536885	0	0.005884	0.005867	5.2e-05	101	69904986	0.9133	0	0.500146	0.005914	0
mctp_sample_198	si_4897	2	101511122	101511122	1	9	101511122	1	10252117054	99499017	10048901332	9590942745	0	0.00299	0.00297	7.5e-05	101	93424512	0.920338	0	0.500106	0.005393	0
mctp_sample_199	si_4898	2	99180676	99180676	1	5	99180676	1	10016701373	96362247	9732048924	9288453052	0	0.003201	0.00315	8.9e-05	101	90603606	0.913521	0	0.501083	0.008124	0
mctp_sample_200	si_4901	2	102426734	102426734	1	5	102426734	1	10344696339	99634701	10062707410	9648078557	0	0.002781	0.002727	7.1e-05	101	94574764	0.923341	0	0.501422	0.006675	0
mctp_sample_201	si_4902	2	102065061	102065061	1	7	102065061	1	10308130884	98490953	9947152542	9515533457	0	0.00313	0.003043	8.8e-05	101	92773594	0.908965	0	0.502476	0.007165	0
mctp_sample_202	si_4899	2	107192681	107192681	1	5	107192681	1	10826195755	103582075	10461529026	9944228352	0	0.003349	0.003287	4.9e-05	101	97280336	0.907528	0	0.502042	0.006954	0
mctp_sample_203	si_4910	2	96205556	96205556	1	4	96205556	1	9716476326	93257481	9418727037	8958844890	0	0.003244	0.003192	5.8e-05	101	87716440	0.911761	0	0.50197	0.007358	0
mctp_sample_204	si_4911	2	105363821	105363821	1	4	105363821	1	10641229827	102067435	10308302359	9851042288	0	0.003143	0.003078	9.1e-05	101	96255386	0.913553	0	0.501346	0.00867	0
mctp_sample_205	si_4900	2	112878718	112878718	1	13	112878718	1	11400479708	109655334	11074924351	10549009140	0	0.002965	0.002938	4.4e-05	101	103998498	0.92133	0	0.500312	0.005871	0
mctp_sample_206	si_4907	2	126922272	126922272	1	13	126922272	1	12818818966	124071707	12530918788	11968008006	0	0.002838	0.002809	4.5e-05	101	111079104	0.875174	0	0.498371	0.006908	0
mctp_sample_207	si_4959	2	72927098	72927098	1	1	72927098	1	7365368285	70630297	7133398358	6639738314	1	0.006974	0.006954	6.2e-05	101	58824772	0.806624	0	0.505591	0.005785	0
mctp_sample_208	si_4960	2	71508608	71508608	1	2	71508608	1	7222185428	69591208	7028531773	6513343756	1	0.006956	0.006944	4.6e-05	101	57098806	0.798489	0	0.507022	0.004987	0
mctp_sample_209	si_4961	2	69901746	69901746	1	3	69901746	1	7059798105	67834818	6851044140	6368029508	1	0.006983	0.006964	6.3e-05	101	55812788	0.798446	0	0.504463	0.006272	0
mctp_sample_210	si_4792	2	102725212	102725212	1	0	102725212	1	10374841008	99433757	10042411178	9694908863	0	0.002499	0.002447	7.6e-05	101	97541038	0.949534	0	0.50012	0.009029	0
mctp_sample_211	si_4793	2	113501576	113501576	1	2	113501576	1	11462930052	111072809	11217637797	10768637230	0	0.003578	0.003551	0.0001	101	106847776	0.941377	0	0.500359	0.008605	0
mctp_sample_212	si_4794	2	106375088	106375088	1	0	106375088	1	10743326378	102593174	10361361713	9957853227	0	0.003597	0.00354	8.9e-05	101	98888674	0.929622	0	0.502196	0.010786	0
mctp_sample_213	si_4795	2	125346977	125346977	1	6	125346977	1	12659325128	122162702	12337725231	11841648373	0	0.003611	0.003576	0.000103	101	117467040	0.937135	0	0.500782	0.007119	0
mctp_sample_214	si_4956	2	81747525	81747525	1	0	81747525	1	8256280031	79703045	8049791244	7463968360	1	0.007064	0.007054	4.4e-05	101	66009210	0.807477	0	0.502064	0.003946	0
mctp_sample_215	si_4957	2	113483854	113483854	1	7	113483854	1	11461294115	111309793	11241720210	10704232872	0	0.002835	0.002818	7.7e-05	101	104363424	0.919632	0	0.500303	0.004354	0
mctp_sample_216	si_4958	2	107189451	107189451	1	1	107189451	1	10825720598	104959354	10600485277	10088671465	0	0.002766	0.002736	6.5e-05	101	98412148	0.918114	0	0.500295	0.004924	0
mctp_sample_217	si_4871	2	143157376	143157376	1	15	143157376	1	14458112706	140269994	14166502356	13279092138	0	0.002913	0.0029	6.7e-05	101	133669466	0.933724	0	0.499874	0.003578	0
mctp_sample_218	si_4904	2	108785469	108785469	1	104	108785469	1	10987058629	106639335	10770303343	10267586291	0	0.003824	0.003812	4.1e-05	101	99923180	0.918534	0	0.499783	0.006083	0
mctp_sample_219	si_4872	2	119990262	119990262	1	15	119990262	1	12118504889	117675017	11884673060	11310342167	0	0.00345	0.003434	6.4e-05	101	110437280	0.920385	0	0.500141	0.005347	0
mctp_sample_220	si_5388	2	46746939	46746939	1	4	46746939	1	4721132411	45921470	4637762913	4452909037	0	0.00214	0.002131	9.2e-05	101	44542454	0.952842	0	0.500195	0.005712	0
mctp_sample_221	si_5389	2	59107648	59107648	1	3	59107648	1	5969543015	58204860	5878364758	5645891467	0	0.002163	0.002149	8e-05	101	56237546	0.951443	0	0.500411	0.00625	0
mctp_sample_222	si_5390	2	52463880	52463880	1	0	52463880	1	5298538421	51669373	5218296366	5017577852	0	0.002136	0.002125	8.3e-05	101	49957824	0.952233	0	0.500546	0.005994	0
mctp_sample_223	si_5391	2	59274103	59274103	1	5	59274103	1	5986232281	58436345	5901623471	5674527080	0	0.002192	0.00218	0.000107	101	56587900	0.954682	0	0.500226	0.00506	0
mctp_sample_224	si_5392	2	61245440	61245440	1	5	61245440	1	6185397139	60174218	6077207408	5851682041	0	0.002183	0.002171	9e-05	101	58281110	0.951599	0	0.500171	0.005765	0
mctp_sample_225	si_5393	2	53806544	53806544	1	3	53806544	1	5434145533	53105683	5363361614	5156180097	0	0.002151	0.002141	8.4e-05	101	51284238	0.953123	0	0.500372	0.004523	0
mctp_sample_226	si_5394	2	49365385	49365385	1	3	49365385	1	4985607114	48364008	4884471311	4695156141	0	0.002185	0.002174	8.4e-05	101	46745852	0.946936	0	0.500217	0.005221	0
mctp_sample_227	si_5395	2	64572617	64572617	1	2	64572617	1	6521403607	63502184	6413294488	6176160186	0	0.002108	0.002095	9.3e-05	101	61589110	0.953796	0	0.500001	0.006397	0
mctp_sample_228	si_5384	2	58450898	58450898	1	1	58450898	1	5903148149	57489799	5806081222	5580570518	0	0.002113	0.002098	9.1e-05	101	55802604	0.954692	0	0.499935	0.00656	0
mctp_sample_229	si_5385	2	56128839	56128839	1	1	56128839	1	5668686216	55104344	5565216134	5347871509	0	0.00215	0.002133	8e-05	101	53458210	0.95242	0	0.500179	0.005506	0
mctp_sample_230	si_5386	2	54746361	54746361	1	0	54746361	1	5529004605	53971210	5450717575	5226115164	0	0.002304	0.002295	9.9e-05	101	51881874	0.947677	0	0.500251	0.005109	0
mctp_sample_231	si_5387	2	56007313	56007313	1	3	56007313	1	5656397976	55225567	5577445046	5349816104	0	0.002204	0.002193	8.8e-05	101	53344834	0.952462	0	0.500219	0.004387	0
mctp_sample_232	si_4154	2	136646559	136646559	1	28	136646559	1	14210158363	133708839	13904651670	13372258332	0	0.002999	0.002979	0.000108	104	123594704	0.904485	0	0.500719	0.010588	0
mctp_sample_233	si_4348	2	149754926	149754926	1	3	149754926	1	15124098260	146839642	14829671002	14110020859	0	0.004709	0.004696	0.000101	101	137276458	0.916674	0	0.500989	0.003675	0
mctp_sample_234	si_4349	2	123276498	123276498	1	6	123276498	1	12449877658	120887507	12208606727	11608486225	0	0.004761	0.004744	0.000113	101	111566162	0.905008	0	0.500234	0.004492	0
mctp_sample_235	si_4441	2	79420901	79420901	1	3	79420901	1	8020910601	77235052	7800151904	7614162762	0	0.003142	0.003115	0.00011	101	59941540	0.754733	0	0.5018	0.005869	0
mctp_sample_236	si_4442	2	100064939	100064939	1	5	100064939	1	10105782626	97221106	9818575502	9575557499	0	0.003223	0.003196	0.000105	101	75901530	0.758523	0	0.501805	0.007552	0
mctp_sample_237	si_4443	2	25762976	25762976	1	0	25762976	1	2601855870	25108478	2535755718	2481371052	0	0.003076	0.003039	0.000123	101	19184846	0.744667	0	0.500136	0.008531	0
mctp_sample_238	si_4736	2	99911527	99911527	1	5	99911527	1	10090598940	97964282	9893935064	9515435181	0	0.003761	0.003745	7.1e-05	101	90574618	0.906548	0	0.5006	0.004881	0
mctp_sample_239	si_4850	2	137736342	137736342	1	16	137736342	1	13910292356	134368503	13570160434	13171282801	0	0.00224	0.002211	0.00011	101	130679496	0.948766	0	0.500545	0.007805	0
mctp_sample_240	si_4851	2	157278893	157278893	1	11	157278893	1	15884209699	154033994	15556487786	15080905865	0	0.003846	0.003824	9.2e-05	101	144820012	0.920785	0	0.500416	0.004665	0
mctp_sample_241	si_4852	2	133334192	133334192	1	13	133334192	1	13464948131	130547605	13183535955	12701973577	0	0.003839	0.003823	0.000158	101	122603320	0.919519	0	0.500798	0.00465	0
mctp_sample_242	si_4924	2	231417304	231417304	1	18	231417304	1	23371903275	225884381	22813097574	21329573861	0	0.00373	0.003708	7.7e-05	101	196271228	0.848127	0	0.500783	0.005375	0
mctp_sample_243	si_4853	2	162682811	162682811	1	9	162682811	1	16429915786	159562213	16114749947	15549150343	0	0.003564	0.003546	9.6e-05	101	151009682	0.928246	0	0.500187	0.005335	0
mctp_sample_244	si_5256	2	146066467	146066467	1	11	146066467	1	14752274774	142993005	14441863447	13641826174	0	0.005215	0.005197	5.1e-05	101	136082526	0.931648	0	0.500167	0.005043	0
mctp_sample_245	si_4925	2	188634415	188634415	1	11	188634415	1	19051132190	185241322	18708440778	17817363618	0	0.004134	0.004122	7.5e-05	101	177035484	0.938511	0	0.500239	0.004217	0
mctp_sample_246	si_4926	2	178909180	178909180	1	18	178909180	1	18068669922	174203576	17593425913	16885400800	0	0.003193	0.00317	9.2e-05	101	155084640	0.866834	0	0.500051	0.006526	0
mctp_sample_247	si_4965	2	81042026	81042026	1	13	81042026	1	8184731982	79229131	8001637541	7598745224	0	0.003176	0.003156	8.8e-05	101	71517652	0.882476	0	0.500431	0.00483	0
mctp_sample_248	si_5026	2	141391394	141391394	1	14	141391394	1	14279756497	138311260	13968673467	13465030721	0	0.002807	0.002789	8.4e-05	101	130667100	0.924152	0	0.50067	0.004874	0
mctp_sample_249	si_5043	2	152037092	152037092	1	6	152037092	1	15354434520	147796082	14926110821	14407026303	0	0.002406	0.002366	0.000122	101	142688676	0.938512	0	0.500531	0.006558	0
mctp_sample_250	si_5059	2	105444760	105444760	1	3	105444760	1	10649051298	101014342	10201591848	9839815849	0	0.002521	0.002503	0.00012	101	96727174	0.917326	0	0.500465	0.00441	0
mctp_sample_251	si_5045	2	138797794	138797794	1	12	138797794	1	14017659191	135790713	13713956334	13276282540	0	0.002953	0.002938	9.2e-05	101	119626012	0.861873	0	0.500497	0.004684	0
mctp_sample_252	si_5060	2	155411301	155411301	1	5	155411301	1	15695695899	151427281	15293326136	14593616574	0	0.002543	0.002522	7.6e-05	101	143118292	0.9209	0	0.500736	0.005124	0
mctp_sample_253	si_5091	2	94516930	94516930	1	1	94516930	1	9545590178	92550653	9347004455	8997959661	0	0.002471	0.002454	9.1e-05	101	87815846	0.929102	0	0.50019	0.004518	0
mctp_sample_254	si_5062	2	152791340	152791340	1	10	152791340	1	15430945350	149398352	15088267853	14465490075	0	0.002588	0.002568	9.7e-05	101	140982442	0.922712	0	0.500999	0.005043	0
mctp_sample_255	si_5150	2	129772791	129772791	1	7	129772791	1	13105935356	127167187	12842787578	12243768643	0	0.003107	0.003089	0.000116	101	117328798	0.904109	0	0.500855	0.004799	0
mctp_sample_256	si_5183	2	148442178	148442178	1	4	148442178	1	14992106243	145089226	14653467586	14036956190	0	0.003324	0.003309	5.8e-05	101	138826448	0.935222	0	0.500221	0.004374	0
mctp_sample_257	si_5153	2	141208489	141208489	1	22	141208489	1	14261231627	137732939	13910216059	13351933146	0	0.002824	0.002805	8.7e-05	101	130753570	0.925961	0	0.500201	0.005671	0
mctp_sample_258	si_5154	2	111072241	111072241	1	2	111072241	1	11217645927	108701548	10978214618	10533785438	0	0.002665	0.002648	8.8e-05	101	102558678	0.923351	0	0.500159	0.005034	0
mctp_sample_259	si_5184	2	150486143	150486143	1	12	150486143	1	15198702762	146475657	14793651103	14112021597	0	0.003883	0.003866	4.2e-05	101	137806654	0.915743	0	0.499945	0.004871	0
mctp_sample_260	si_5185	2	137994870	137994870	1	4	137994870	1	13936927459	134076908	13541225535	12936411545	0	0.002905	0.002883	6.1e-05	101	116350082	0.843148	0	0.499425	0.006387	0
mctp_sample_261	si_5186	2	120839925	120839925	1	2	120839925	1	12204158630	117750380	11892124268	11385924293	0	0.002819	0.002784	8.2e-05	101	110945294	0.918118	0	0.500627	0.005277	0
mctp_sample_262	si_5187	2	111598996	111598996	1	12	111598996	1	11270974461	109228173	11031529787	10515327155	0	0.003366	0.003349	7e-05	101	88842048	0.796083	0	0.501743	0.004964	0
mctp_sample_263	si_5188	2	152797972	152797972	1	6	152797972	1	15431969304	149982082	15147573234	14611697307	0	0.003008	0.002993	6.2e-05	101	145980726	0.955384	0	0.500224	0.004123	0
mctp_sample_264	si_5257	2	120417313	120417313	1	1	120417313	1	12161815149	117543682	11871583584	11279567400	1	0.006394	0.00638	5e-05	101	112352236	0.933024	0	0.500164	0.004732	0
mctp_sample_265	si_5281	2	134404739	134404739	1	8	134404739	1	13574478682	131778024	13309185777	12687094236	1	0.006789	0.00678	4.4e-05	101	126156694	0.938633	1	0.500169	0.004	0
mctp_sample_266	si_5258	2	134104314	134104314	1	9	134104314	1	13543842589	131189407	13249447311	12615474221	1	0.006974	0.006964	7.2e-05	101	124889290	0.931285	1	0.500189	0.004767	0
mctp_sample_267	si_5351	2	50611773	50611773	1	3	50611773	1	5110837996	49175862	4965832621	4768174716	0	0.003895	0.003878	0.000211	101	26029528	0.514298	0	0.495517	0.008291	0
mctp_sample_268	si_5409	2	237645051	237645051	1	12	237645051	1	24000867633	232743407	23505818759	21724735167	0	0.005941	0.005931	7.3e-05	101	214288756	0.901718	0	0.500765	0.005496	0
mctp_sample_269	si_5410	2	169396521	169396521	1	14	169396521	1	17107712821	165862877	16750831955	16032626468	0	0.00226	0.002243	0.000107	101	159752272	0.943067	0	0.500366	0.00538	0
mctp_sample_270	si_5484	2	97125669	97125669	1	3	97125669	1	9808838898	94940111	9588110524	9159450620	0	0.002706	0.002681	0.000114	101	86763362	0.89331	0	0.500211	0.00857	0
mctp_sample_271	si_5485	2	94857136	94857136	1	5	94857136	1	9580016254	93025243	9395001484	8945795879	0	0.002742	0.002729	8.1e-05	101	84903390	0.895066	0	0.500368	0.005822	0
mctp_sample_272	si_5552	2	92192762	92192762	1	49	92192762	1	9310970546	90543194	9144371235	8753871705	0	0.003302	0.003275	7.9e-05	101	83780824	0.908757	0	0.501391	0.00742	0
mctp_sample_273	si_5553	2	90863866	90863866	1	1	90863866	1	9176558687	88731845	8961235803	8564799156	0	0.003344	0.003326	0.0001	101	81407668	0.89593	0	0.500385	0.006667	0
mctp_sample_274	si_5589	2	82317599	82317599	1	4	82317599	1	8313639117	79998561	8079424134	7810516001	0	0.002157	0.002134	8.4e-05	101	74545984	0.90559	0	0.502351	0.014075	0
mctp_sample_275	si_4550	2	89960896	89960896	1	77	89960896	1	9085692366	88359377	8923943921	8364973184	0	0.003996	0.003983	6.2e-05	101	83269876	0.925623	0	0.500461	0.006115	0
mctp_sample_276	si_4868	2	77638743	77638743	1	5	77638743	1	7841133937	76036996	7679363193	7279803933	0	0.003272	0.003265	7.5e-05	101	72880072	0.938708	0	0.500324	0.003597	0
mctp_sample_277	si_4866	2	89444312	89444312	1	1	89444312	1	9033590178	87786760	8866181418	8360891416	0	0.003306	0.003297	4.9e-05	101	84074318	0.939963	0	0.500434	0.004161	0
mctp_sample_278	si_4867	2	161990896	161990896	1	7	161990896	1	16360863805	158768564	16035412237	15151822777	0	0.003272	0.00326	2.5e-05	101	153501252	0.947592	0	0.499572	0.003454	0
mctp_sample_279	si_4551	2	102987543	102987543	1	14	102987543	1	10401357804	100952023	10195777915	9590207284	0	0.003912	0.003894	6e-05	101	95740996	0.929637	0	0.500402	0.006018	0
mctp_sample_280	si_4760	2	82809392	82809392	1	3	82809392	1	8363298419	81254998	8206310485	7878095021	0	0.002719	0.002709	7.2e-05	101	71769528	0.866683	0	0.499115	0.005498	0
mctp_sample_281	si_4761	2	51515865	51515865	1	3	51515865	1	5202862118	50462307	5096456765	4928450543	0	0.002402	0.002385	6.7e-05	101	49242498	0.955871	0	0.500117	0.005353	0
mctp_sample_282	si_4686	2	114089463	114089463	1	3	114089463	1	11522587051	111964559	11307975348	10790852996	0	0.002946	0.002939	4.8e-05	101	106790768	0.936027	0	0.500578	0.00488	0
mctp_sample_283	si_4720	2	88235999	88235999	1	2	88235999	1	8911193934	86676912	8753734615	8290677452	0	0.002857	0.002845	9.6e-05	101	82173692	0.931294	0	0.500377	0.004612	0
mctp_sample_284	si_4762	2	81139829	81139829	1	3	81139829	1	8194857167	79531686	8032439498	7757126913	0	0.002403	0.002391	6.3e-05	101	77620844	0.956631	0	0.500141	0.005495	0
mctp_sample_285	si_4691	2	92178732	92178732	1	2	92178732	1	9309845567	90486377	9138920649	8727837535	0	0.003004	0.002995	5.2e-05	101	86353276	0.936803	0	0.500294	0.004669	0
mctp_sample_286	si_4777	2	112179926	112179926	1	8	112179926	1	11329661341	110079161	11117491954	10659641227	0	0.0042	0.004187	6.5e-05	101	104759122	0.933849	0	0.499976	0.006246	0
mctp_sample_287	si_4723	2	80737363	80737363	1	0	80737363	1	8154179466	79112076	7990030096	7564851537	0	0.002799	0.002789	8.3e-05	101	74999608	0.928933	0	0.500623	0.004702	0
mctp_sample_288	si_4722	2	95665583	95665583	1	5	95665583	1	9661807242	93963988	9489951852	8957197202	0	0.002887	0.002872	6.7e-05	101	88723284	0.927432	0	0.500278	0.005837	0
mctp_sample_289	si_4705	2	87124718	87124718	1	0	87124718	1	8799269444	84908679	8575454228	8275517899	0	0.003772	0.00376	8.2e-05	101	81554494	0.936066	0	0.500298	0.005879	0
mctp_sample_290	si_4724	2	86877589	86877589	1	4	86877589	1	8774060996	85324964	8617254068	8175424709	0	0.002879	0.002866	9e-05	101	80975790	0.932068	0	0.500246	0.005621	0
mctp_sample_291	si_4772	2	83657686	83657686	1	4	83657686	1	8449127370	82004775	8282187827	7989922331	0	0.003231	0.003223	5.3e-05	101	79871906	0.954747	0	0.500172	0.004891	0
mctp_sample_292	si_4707	2	77049894	77049894	1	9	77049894	1	7781510729	75309341	7605725644	7241693613	0	0.002726	0.002695	9.3e-05	101	71707040	0.930657	0	0.500387	0.010506	0
mctp_sample_293	si_4706	2	56679026	56679026	1	0	56679026	1	5724358256	55130342	5567947198	5303551930	0	0.004283	0.004235	6.5e-05	101	52183916	0.920692	0	0.50006	0.021376	0
mctp_sample_294	si_4687	2	116279438	116279438	1	12	116279438	1	11743796765	114555373	11569671262	11067815160	0	0.002996	0.002988	5.6e-05	101	108937418	0.936859	0	0.500792	0.005165	0
mctp_sample_295	si_4764	2	80824775	80824775	1	7	80824775	1	8162968010	79147578	7993576815	7755356294	0	0.002217	0.002202	6e-05	101	77424670	0.957932	0	0.500181	0.005701	0
mctp_sample_296	si_4721	2	88403071	88403071	1	2	88403071	1	8928135676	86823348	8768591822	8335957959	0	0.002723	0.002716	8.5e-05	101	82691306	0.93539	0	0.500317	0.004242	0
mctp_sample_297	si_4692	2	95590993	95590993	1	6	95590993	1	9654486053	94006252	9494429487	9011965544	0	0.004289	0.004286	3.7e-05	101	88180414	0.922476	0	0.5005	0.003837	0
mctp_sample_298	si_4770	2	97582440	97582440	1	6	97582440	1	9855132126	95686738	9663675159	9321909531	0	0.003242	0.003232	9.4e-05	101	92431064	0.94721	0	0.500287	0.005303	0
mctp_sample_299	si_4765	2	96363340	96363340	1	4	96363340	1	9732418106	94310877	9525124190	9214435935	0	0.002907	0.002896	4.5e-05	101	92534754	0.960269	0	0.500272	0.005076	0
mctp_sample_300	si_4753	2	102744060	102744060	1	2	102744060	1	10376574414	100955070	10195893216	9827929006	0	0.002684	0.002677	0.000103	101	89242078	0.868586	0	0.500559	0.004643	0
mctp_sample_301	si_4754	2	96358977	96358977	1	3	96358977	1	9731817185	94392613	9533221121	9226304492	0	0.002584	0.002567	9.2e-05	101	83210486	0.863547	0	0.500419	0.006343	0
mctp_sample_302	si_4775	2	124075769	124075769	1	5	124075769	1	12530838912	120970209	12217191108	11737680340	0	0.004255	0.00424	8.8e-05	101	115293460	0.929218	0	0.500307	0.006205	0
mctp_sample_303	si_4927	2	164318387	164318387	1	21	164318387	1	16595472944	160996700	16259995367	15569480121	0	0.00287	0.002853	6.4e-05	101	146587468	0.892094	0	0.501446	0.0072	0
mctp_sample_304	si_4941	2	99083251	99083251	1	7	99083251	1	10006759929	97424634	9839247030	9398479902	0	0.003859	0.003853	9.2e-05	101	90458790	0.912957	0	0.500003	0.00454	0
mctp_sample_305	si_4912	2	34236410	34236410	1	0	34236410	1	3457730678	33692566	3402804805	3275778016	0	0.003283	0.003263	7.6e-05	101	30363660	0.886882	0	0.501832	0.007645	0
mctp_sample_306	si_4942	2	82851553	82851553	1	0	82851553	1	8367502790	81589900	8240080212	7847884839	0	0.003763	0.003756	8.7e-05	101	75305508	0.908921	0	0.500947	0.004094	0
mctp_sample_307	si_4913	2	83381017	83381017	1	4	83381017	1	8421070346	81134299	8194160943	7855606958	0	0.003585	0.003564	8.4e-05	101	73419604	0.880531	0	0.50051	0.005349	0
mctp_sample_308	si_4914	2	92046440	92046440	1	0	92046440	1	9296400465	90442166	9134372020	8699882830	0	0.003664	0.003655	5.5e-05	101	83506106	0.907217	0	0.499871	0.003759	0
mctp_sample_309	si_4915	2	91207726	91207726	1	5	91207726	1	9211510140	89577178	9046830812	8695520227	0	0.003512	0.0035	8e-05	101	82928994	0.909232	0	0.499911	0.006103	0
mctp_sample_310	si_4916	2	83091591	83091591	1	8	83091591	1	8391924857	80881919	8168752835	7845805433	0	0.00362	0.003609	6.8e-05	101	75066220	0.903415	0	0.501332	0.003941	0
mctp_sample_311	si_4917	2	104574448	104574448	1	3	104574448	1	10561602372	102507510	10352846585	9974518420	0	0.003501	0.003486	6.9e-05	101	94006102	0.89894	0	0.500218	0.004368	0
mctp_sample_312	si_4918	2	85711756	85711756	1	3	85711756	1	8656601672	84296848	8513699046	8202184780	0	0.002961	0.002955	5.6e-05	101	81363898	0.949273	0	0.500657	0.00376	0
mctp_sample_313	si_4919	2	92026497	92026497	1	14	92026497	1	9294212552	90262449	9116049815	8786656404	0	0.003013	0.002999	8.4e-05	101	87300232	0.948642	0	0.498539	0.005497	0
mctp_sample_314	si_4920	2	83763196	83763196	1	1	83763196	1	8459745257	82338944	8315899387	8002520599	0	0.002961	0.002951	6.7e-05	101	79747614	0.95206	0	0.498429	0.004831	0
mctp_sample_315	si_4921	2	89033370	89033370	1	3	89033370	1	8991911924	86778707	8764200677	8429213416	0	0.002558	0.002538	8.1e-05	101	83870514	0.942012	0	0.500542	0.004893	0
mctp_sample_316	si_4922	2	89100019	89100019	1	8	89100019	1	8998656528	87643410	8851545545	8513510633	0	0.002583	0.002577	7.6e-05	101	85186752	0.95608	0	0.499804	0.005385	0
mctp_sample_317	si_4923	2	115440492	115440492	1	32	115440492	1	11658969300	113394429	11452323392	11089449258	0	0.002111	0.002096	7.7e-05	101	110663110	0.958616	0	0.500236	0.007305	0
mctp_sample_318	si_4939	2	116326328	116326328	1	2	116326328	1	11748053662	114372912	11550770160	10948262382	0	0.003135	0.003125	0.000106	101	106085144	0.911962	0	0.500361	0.005326	0
mctp_sample_319	si_4940	2	91529850	91529850	1	2	91529850	1	9243886949	90023972	9091800578	8563758529	0	0.003646	0.003643	9.3e-05	101	82278352	0.898924	0	0.501913	0.004663	0
mctp_sample_320	si_5189	2	143527180	143527180	1	23	143527180	1	14495401871	139336913	14072202260	13591184174	0	0.002353	0.002332	8.7e-05	101	136741704	0.952723	0	0.499978	0.006762	0
mctp_sample_321	si_5190	2	138333221	138333221	1	3	138333221	1	13971165114	134976630	13632155881	12985842112	1	0.007722	0.007713	5.7e-05	101	123324816	0.891505	0	0.50017	0.004616	0
mctp_sample_322	si_5191	2	156551035	156551035	1	7	156551035	1	15811014896	152994687	15451833954	14963210569	0	0.001937	0.001926	6.3e-05	101	150474402	0.961184	0	0.50021	0.005557	0
mctp_sample_323	si_5255	2	151213958	151213958	1	9	151213958	1	15271785884	147205203	14866915429	14188768921	0	0.004874	0.004861	8.3e-05	101	139621028	0.923334	0	0.500317	0.005671	0
mctp_sample_324	si_5411	2	149058479	149058479	1	1	149058479	1	15053693202	135549759	13689337885	13116093859	0	0.002406	0.002383	0.000107	101	139390162	0.935137	0	0.50194	0.005594	0
mctp_sample_325	si_5487	2	111844451	111844451	1	0	111844451	1	11295765344	99034589	10001977773	9601308569	0	0.002171	0.002166	6.6e-05	101	102730514	0.918512	0	0.501662	0.00426	0
mctp_sample_326	si_5597	2	92602722	92602722	1	9	92602722	1	9352652180	74217946	7495794246	7228661971	0	0.002248	0.002301	4.4e-05	101	82380870	0.889616	0	0.488011	0.004825	0
mctp_sample_327	si_5596	2	85759576	85759576	1	5	85759576	1	8661169921	84080986	8491639051	8195605156	0	0.002284	0.00226	9.8e-05	101	77497796	0.903663	0	0.500084	0.007594	0
mctp_sample_328	si_4467	2	93893990	93893990	1	29	93893990	1	9482711643	91528676	9243824536	8955956433	0	0.002325	0.002302	9.2e-05	101	89493370	0.953132	0	0.500203	0.004797	0
mctp_sample_329	si_4468	2	78517746	78517746	1	12	78517746	1	7929926321	76432459	7719318525	7504392824	0	0.002257	0.002219	8.7e-05	101	74307232	0.946375	0	0.500456	0.005992	0
mctp_sample_330	si_4469	2	96302715	96302715	1	15	96302715	1	9726109790	94162099	9509915635	9209242633	0	0.002354	0.002337	8.1e-05	101	91203542	0.947051	0	0.500205	0.004786	0
mctp_sample_331	si_4470	2	83468746	83468746	1	3	83468746	1	8429903628	81306812	8211555536	7987274608	0	0.001995	0.001968	9.2e-05	101	78590132	0.941552	0	0.500562	0.005444	0
mctp_sample_332	si_4471	2	100435045	100435045	1	20	100435045	1	10143501832	98058182	9903446689	9634108979	0	0.002011	0.001996	7.5e-05	101	96581436	0.961631	0	0.500243	0.005132	0
mctp_sample_333	si_4300	2	81030455	81030455	1	10	81030455	1	8183474519	79249649	8003621521	7716806557	0	0.002783	0.002768	0.000107	101	76299706	0.941618	0	0.49983	0.004368	0
mctp_sample_334	si_4302	2	82631797	82631797	1	12	82631797	1	8345099690	81126800	8193103901	7895070536	0	0.002819	0.002806	0.000113	101	78029564	0.944304	0	0.500043	0.004518	0
mctp_sample_335	si_4304	2	87804787	87804787	1	11	87804787	1	8867599050	86028062	8688159392	8373098726	0	0.002802	0.002788	0.000112	101	82527416	0.939897	0	0.500027	0.00543	0
mctp_sample_336	si_4306	2	83581995	83581995	1	9	83581995	1	8441075063	81786883	8259778887	7958664593	0	0.002847	0.002832	0.000117	101	78942228	0.944488	0	0.500004	0.005065	0
mctp_sample_337	si_4307	2	87766594	87766594	1	17	87766594	1	8863707351	86158560	8701305873	8363024598	0	0.002792	0.002779	0.000114	101	82632864	0.941507	0	0.499981	0.005022	0
mctp_sample_338	si_4310	2	98330520	98330520	1	9	98330520	1	9930744185	96319466	9727637221	9353656112	0	0.002705	0.002687	9.6e-05	101	92715440	0.942896	0	0.499934	0.005679	0
mctp_sample_339	si_3816	2	112183384	112183384	1	5	112183384	1	11329809920	109693750	11078367816	10513608629	0	0.003093	0.003081	8.9e-05	101	97975382	0.87335	0	0.503251	0.005454	0
mctp_sample_341	si_4640	2	70848590	70848590	1	4	70848590	1	7155091888	68531508	6921080613	6484884450	0	0.005726	0.005703	0.000119	101	61214000	0.864012	0	0.500204	0.005346	0
mctp_sample_342	si_4634	2	76311229	76311229	1	7	76311229	1	7706844432	74746632	7548828282	7103497535	1	0.006934	0.006923	0.000103	101	68288648	0.89487	0	0.499908	0.004421	0
mctp_sample_343	si_4642	2	90710746	90710746	1	6	90710746	1	9161179245	87432227	8830062133	8255291356	0	0.005778	0.005739	0.000102	101	78732946	0.867956	0	0.500394	0.007258	0
mctp_sample_344	si_4637	2	81922258	81922258	1	24	81922258	1	8273614104	79896881	8069061236	7588650972	0	0.003723	0.003705	0.000101	101	74224354	0.906034	0	0.500318	0.004797	0
mctp_sample_345	si_4170	2	91716071	91716071	1	8	91716071	1	9262701328	87573048	8844267979	8187845987	0	0.004025	0.003986	0.0001	101	80763988	0.880587	0	0.498672	0.008488	0
mctp_sample_347	si_4638	2	80205213	80205213	1	3	80205213	1	8100089292	78417031	7919491345	7468520654	0	0.003636	0.003616	0.000108	101	74024532	0.922939	0	0.500077	0.004773	0
mctp_sample_348	si_4635	2	88547604	88547604	1	0	88547604	1	8942828743	86264634	8712256988	8215353543	1	0.006766	0.006755	8.2e-05	101	79587416	0.898809	0	0.500334	0.004808	0
mctp_sample_346	si_3913	2	95635790	95635790	1	13	95635790	1	9371489729	92797403	9093343460	8776819115	0	0.003101	0.00306	0.000126	98	85874602	0.897934	0	0.500664	0.007837	0
mctp_sample_349	si_4636	2	85891927	85891927	1	1	85891927	1	8674647416	83869498	8470387474	7956726226	1	0.006862	0.006846	7.7e-05	101	76996120	0.89643	0	0.500511	0.004334	0
mctp_sample_350	si_4641	2	84822040	84822040	1	3	84822040	1	8566515172	82842438	8366583151	7839741965	0	0.005545	0.005533	8.7e-05	101	75553662	0.890731	0	0.500398	0.004649	0
mctp_sample_351	si_4645	2	97439126	97439126	1	14	97439126	1	9840641335	94775442	9571619151	8919032020	0	0.003945	0.003918	0.000103	101	87963638	0.902755	0	0.500318	0.004829	0
mctp_sample_352	si_4643	2	71165882	71165882	1	2	71165882	1	7187403804	69540946	7023290617	6527558858	0	0.003985	0.003964	7.9e-05	101	63897202	0.897863	0	0.500516	0.004902	0
mctp_sample_353	si_4639	2	93223311	93223311	1	2	93223311	1	9414793379	90803350	9170390869	8626348102	0	0.003882	0.003865	0.00011	101	84943892	0.911187	0	0.500497	0.004421	0
mctp_sample_354	si_4644	2	71587639	71587639	1	2	71587639	1	7229824047	69614704	7030567632	6550427853	0	0.003942	0.003921	0.000103	101	64650334	0.903094	0	0.500251	0.005533	0
mctp_sample_340	si_3915	2	116132752	116132752	1	38	116132752	1	11379871213	113099061	11082585888	10664431807	0	0.002909	0.002882	0.000134	98	104038368	0.895857	0	0.500869	0.005712	0
mctp_sample_355	si_3839	2	103073289	103073289	1	5	103073289	1	10616062372	100938409	10396175808	10063381589	0	0.002437	0.002423	7.9e-05	103	92309120	0.895568	0	0.501429	0.008151	0
mctp_sample_356	si_3840	2	131183766	131183766	1	1	131183766	1	13511098343	128236232	13207516792	12661353974	0	0.002905	0.002894	9.2e-05	103	114476812	0.872645	0	0.500774	0.006103	0
mctp_sample_357	si_3837	2	121954993	121954993	1	6	121954993	1	12560724211	119506605	12308549145	11805102516	0	0.002876	0.002863	8e-05	103	106996442	0.877344	0	0.501461	0.006501	0
mctp_sample_358	si_4057	2	142492221	142492221	1	10	142492221	1	14390862474	139259121	14064332329	13542457720	0	0.002343	0.002326	9.2e-05	101	131274486	0.921275	0	0.500985	0.005631	0
mctp_sample_359	si_4058	2	141387619	141387619	1	5	141387619	1	14279270139	137777637	13914678066	13348759548	0	0.002624	0.002607	9.2e-05	101	129175090	0.913624	0	0.500828	0.007538	0
mctp_sample_360	si_5532	2	69495842	69495842	1	2	69495842	1	7018809587	68202331	6888169183	6533316594	0	0.00263	0.002615	5.5e-05	101	63750694	0.917331	0	0.500746	0.005036	0
mctp_sample_361	si_5533	2	70106544	70106544	1	1	70106544	1	7080372521	68767027	6945085856	6600306101	0	0.002616	0.002602	7.7e-05	101	63733226	0.909091	0	0.500581	0.006759	0
mctp_sample_362	si_5534	2	84899128	84899128	1	2	84899128	1	8574308463	82745894	8356845091	7960572687	0	0.002563	0.002549	8.8e-05	101	76275826	0.898429	0	0.500868	0.0081	0
mctp_sample_363	si_5535	2	79146873	79146873	1	0	79146873	1	7993455586	76816870	7758130804	7361164685	0	0.002947	0.002902	7.9e-05	101	69925182	0.883486	0	0.501146	0.008369	0
mctp_sample_364	si_5536	2	72715116	72715116	1	1	72715116	1	7343803631	71343426	7205267877	6912596949	0	0.002065	0.002053	8.4e-05	101	66851778	0.919366	0	0.500263	0.006834	0
mctp_sample_365	si_5537	2	80108631	80108631	1	0	80108631	1	8090451786	78438631	7921790281	7594410097	0	0.002197	0.002174	9.7e-05	101	73512310	0.917658	0	0.500285	0.007073	0
mctp_sample_366	si_5538	2	83500999	83500999	1	3	83500999	1	8433178792	81694360	8250714231	7911173650	0	0.002084	0.002072	7.7e-05	101	76687656	0.918404	0	0.500643	0.007925	0
mctp_sample_367	si_5539	2	77299657	77299657	1	5	77299657	1	7806785554	75926511	7668103905	7347321821	0	0.002161	0.002142	9.1e-05	101	70702334	0.914653	0	0.500331	0.008469	0
mctp_sample_368	si_3838	2	127080388	127080388	1	4	127080388	1	13088461429	124762972	12849777709	12318684594	0	0.002967	0.002955	9.6e-05	103	110867654	0.872421	0	0.500664	0.006185	0
mctp_sample_369	si_4445	2	84617411	84617411	1	5	84617411	1	8545988789	82391723	8321201302	7988162299	0	0.002599	0.002589	6.9e-05	101	80292662	0.948891	0	0.500378	0.00516	0
mctp_sample_370	si_3841	2	127389367	127389367	1	4	127389367	1	13120260123	124735279	12846901616	12380048416	0	0.002694	0.002682	0.000107	103	113066728	0.887568	0	0.501596	0.005767	0
mctp_sample_371	si_3842	2	133669970	133669970	1	37	133669970	1	13500016805	131118115	13242288286	12834411713	0	0.001954	0.001933	8.1e-05	101	124395478	0.930616	0	0.501937	0.006587	0
mctp_sample_372	si_5000	2	164521636	164521636	1	14	164521636	1	16615681744	161274330	16287718343	15801436951	0	0.002078	0.002061	9.3e-05	101	157456958	0.957059	0	0.500271	0.006064	0
mctp_sample_373	si_5025	2	89372715	89372715	1	11	89372715	1	9026118974	87453037	8832241313	8517863945	0	0.003057	0.003044	8.6e-05	101	82834606	0.926844	0	0.500978	0.004463	0

## Sheet: DataS3_Cohort_RNASeq_Metrics
Supplementary DataS3: RNASeq Metrics
SAMPLE_ID	LIBRARY_ID	PF_BASES	PF_ALIGNED_BASES	RIBOSOMAL_BASES	CODING_BASES	UTR_BASES	INTRONIC_BASES	INTERGENIC_BASES	IGNORED_READS	CORRECT_STRAND_READS	INCORRECT_STRAND_READS	PCT_RIBOSOMAL_BASES	PCT_CODING_BASES	PCT_UTR_BASES	PCT_INTRONIC_BASES	PCT_INTERGENIC_BASES	PCT_MRNA_BASES	PCT_USABLE_BASES	PCT_CORRECT_STRAND_READS	MEDIAN_CV_COVERAGE	MEDIAN_5PRIME_BIAS	MEDIAN_3PRIME_BIAS	MEDIAN_5PRIME_TO_3PRIME_BIAS
Average	Average	1.02385e+10	1.02379e+10	12544.1	5.53877e+09	3.24048e+09	1.09598e+09	3.62689e+08	0	6.90059e+07	365244	1.22703e-06	0.540144	0.318446	0.105905	0.0355038	0.85859	0.858544	0.994704	0.590275	0.479152	0.625701	0.749785
mctp_sample_1	si_3936	10790458220	10789533036	12322	4934362584	3628938482	1711427413	514792238	0	66110916	530878	1e-06	0.457329	0.336339	0.158619	0.047712	0.793667	0.793599	0.992034	0.545391	0.474071	0.681676	0.705417
mctp_sample_2	si_3937	11094045131	11093227159	9090	6462362437	3715419882	609615810	305819940	0	78133491	217775	1e-06	0.58255	0.334927	0.054954	0.027568	0.917477	0.917409	0.997221	0.553611	0.475472	0.624463	0.715602
mctp_sample_3	si_3938	10990285003	10989492403	8888	5894327715	3499533842	1239235678	356386280	0	74415127	334446	1e-06	0.53636	0.318444	0.112766	0.03243	0.854804	0.854742	0.995526	0.553337	0.451357	0.637078	0.704877
mctp_sample_4	si_3939	10586347623	10585563740	9898	5545348368	3438486146	1267534584	334184746	0	70222095	274891	1e-06	0.52386	0.324828	0.119742	0.03157	0.848687	0.848625	0.996101	0.550655	0.454489	0.655695	0.675152
mctp_sample_5	si_3940	10765165699	10764334174	10302	5401042403	3932487272	973556986	457237211	0	72151981	330226	1e-06	0.501754	0.365326	0.090443	0.042477	0.867079	0.867012	0.995444	0.584533	0.379867	0.618897	0.587465
mctp_sample_6	si_3941	12901724244	12900836956	8484	7210411858	4269171745	1075998239	345246630	0	89832370	284087	1e-06	0.55891	0.330922	0.083405	0.026762	0.889832	0.889771	0.996848	0.543642	0.443157	0.677549	0.673435
mctp_sample_7	si_3942	9599490561	9598714408	8080	4991271160	3253646426	1005363396	348425346	0	64970547	307327	1e-06	0.519994	0.338967	0.104739	0.036299	0.858961	0.858891	0.995292	0.549877	0.423789	0.634749	0.698206
mctp_sample_8	si_3943	11712677807	11711785198	11514	6337389081	4104824511	886856325	382703767	0	81993160	334016	1e-06	0.541112	0.350487	0.075723	0.032677	0.891599	0.891531	0.995943	0.544375	0.460195	0.644076	0.699054
mctp_sample_9	si_3944	10626003859	10625199439	12120	5324208630	3409517149	1426861130	464600410	0	69707987	545063	1e-06	0.501093	0.32089	0.13429	0.043726	0.821982	0.82192	0.992241	0.536946	0.424327	0.624743	0.716639
mctp_sample_10	si_3945	11322610151	11321696374	8080	5684642172	3778481333	1360254682	498310107	0	74005956	418385	1e-06	0.502102	0.333738	0.120146	0.044014	0.83584	0.835772	0.994378	0.547024	0.426674	0.626098	0.692706
mctp_sample_11	si_3946	12574865923	12573832747	18382	6456331454	3883089492	1773823604	460569816	0	79955788	421544	1e-06	0.513474	0.308823	0.141073	0.036629	0.822297	0.822229	0.994755	0.51065	0.467451	0.694984	0.709412
mctp_sample_12	si_3947	11784003805	11783260137	12120	6512103659	3628808943	1278336537	363998879	0	79611546	445116	1e-06	0.552657	0.307963	0.108488	0.030891	0.86062	0.860566	0.99444	0.523752	0.496827	0.614711	0.782606
mctp_sample_13	si_3948	14358693061	14357503427	9064	7615597831	4928775281	1388114840	425006413	0	95984781	335835	1e-06	0.530426	0.343289	0.096682	0.029602	0.873715	0.873643	0.996513	0.54409	0.415376	0.670164	0.648441
mctp_sample_14	si_3949	12782795734	12781762965	14140	7006317348	4483925771	955256524	336249186	0	90174705	278746	1e-06	0.54815	0.350807	0.074736	0.026307	0.898956	0.898883	0.996918	0.522089	0.503979	0.629445	0.767612
mctp_sample_15	si_3950	12589924215	12589027214	10302	6413379456	3697850763	1848331205	629455489	0	79935502	662233	1e-06	0.509442	0.293736	0.146821	0.05	0.803178	0.803121	0.991783	0.514876	0.549291	0.66276	0.80004
mctp_sample_16	si_3951	11308806279	11307994984	9696	6354793124	3549146969	1091763811	312281385	0	77952567	343484	1e-06	0.561973	0.313862	0.096548	0.027616	0.875835	0.875772	0.995613	0.517467	0.52745	0.661998	0.815922
mctp_sample_17	si_3952	11977691505	11976748574	10504	6200781042	3743853347	1637418899	394684782	0	78464106	370237	1e-06	0.517735	0.312593	0.136716	0.032954	0.830328	0.830263	0.995304	0.535984	0.47364	0.697879	0.717343
mctp_sample_18	si_3953	11789803124	11788741824	12120	5746787042	3893056382	1639614143	509272137	0	75233813	428105	1e-06	0.487481	0.330235	0.139083	0.0432	0.817716	0.817642	0.994342	0.535196	0.448343	0.671513	0.678791
mctp_sample_19	si_3954	11459336073	11458316938	9898	5721470315	3889212365	1440543848	407080513	0	74311029	346306	1e-06	0.499329	0.339423	0.12572	0.035527	0.838752	0.838677	0.995361	0.550513	0.446673	0.694618	0.643564
mctp_sample_20	si_3955	13445806800	13444739404	9494	7226889893	4190491753	1544474820	482873444	0	88923084	466009	1e-06	0.537525	0.311683	0.114876	0.035915	0.849208	0.849141	0.994787	0.531212	0.525354	0.675525	0.765981
mctp_sample_21	si_3956	11451205775	11450299682	7070	6033713340	3743668827	1145420603	527489843	0	76727348	419531	1e-06	0.526948	0.326949	0.100034	0.046068	0.853897	0.85383	0.994562	0.532982	0.501407	0.597999	0.755335
mctp_sample_22	si_3957	10391700423	10390736533	15352	4981780788	3686004840	1313599423	409336132	0	67401353	373611	1e-06	0.479444	0.35474	0.12642	0.039394	0.834184	0.834107	0.994487	0.588466	0.373763	0.681039	0.53079
mctp_sample_23	si_3958	11582324884	11581537274	4444	6514629741	3776142981	990738353	300021755	0	80936647	259923	0	0.562501	0.326049	0.085545	0.025905	0.88855	0.888489	0.996799	0.57559	0.465392	0.565081	0.791556
mctp_sample_24	si_3959	13256245556	13255265417	8282	7919198940	4217741131	788442073	329874991	0	93478718	271228	1e-06	0.597438	0.318194	0.059481	0.024886	0.915632	0.915564	0.997107	0.549308	0.49966	0.593249	0.799407
mctp_sample_25	si_3960	11545297072	11544512916	11514	6452847276	3483977062	1273141013	334536053	0	77819391	358212	1e-06	0.558954	0.301786	0.110281	0.028978	0.86074	0.860682	0.995418	0.556641	0.504737	0.627576	0.738318
mctp_sample_26	si_3961	11070883003	11070079110	11918	6265924446	3209954999	1267776841	326410906	0	75124856	307040	1e-06	0.566023	0.289967	0.114523	0.029486	0.85599	0.855928	0.99593	0.532299	0.537115	0.622209	0.775966
mctp_sample_27	si_3962	11856071244	11855339967	9898	6478239904	3458693579	1539895694	378500894	0	78375653	438303	1e-06	0.546441	0.291741	0.12989	0.031927	0.838182	0.83813	0.994439	0.56158	0.47158	0.617305	0.725177
mctp_sample_28	si_3963	9923819135	9923058277	9090	5058195798	3215746710	1228722932	420383749	0	65229391	401481	1e-06	0.509742	0.324068	0.123825	0.042364	0.83381	0.833746	0.993883	0.565654	0.457753	0.639905	0.678871
mctp_sample_29	si_3964	12628969502	12628254245	8484	7646860206	3871243483	797061854	313080218	0	91196620	364567	1e-06	0.605536	0.306554	0.063117	0.024792	0.91209	0.912038	0.996018	0.56009	0.507345	0.597262	0.804582
mctp_sample_30	si_3965	14098193272	14097358044	7272	8571615802	4251341385	921137685	353255900	0	101527244	347699	1e-06	0.60803	0.30157	0.065341	0.025058	0.9096	0.909546	0.996587	0.550635	0.524663	0.630888	0.797587
mctp_sample_31	si_3966	8891296640	8890717649	11716	4361189933	2917668845	1289193530	322653627	0	56898341	347229	1e-06	0.490533	0.32817	0.145004	0.036291	0.818703	0.81865	0.993934	0.597966	0.376011	0.650672	0.562266
mctp_sample_32	si_3967	10211603687	10210920436	10100	5670367247	3323418906	897225896	319898289	0	69436795	306545	1e-06	0.555324	0.325477	0.087869	0.031329	0.880801	0.880742	0.995605	0.585766	0.439062	0.623183	0.668928
mctp_sample_33	si_3969	12697877459	12697020371	9696	7536623139	4295580628	569363231	295443677	0	91979694	228770	1e-06	0.593574	0.338314	0.044842	0.023269	0.931888	0.931825	0.997519	0.5853	0.434799	0.57736	0.686882
mctp_sample_34	si_3970	13489588987	13488776526	14342	8144653138	4245198889	735014291	363895866	0	96110404	398474	1e-06	0.60381	0.314721	0.054491	0.026978	0.91853	0.918475	0.995871	0.572049	0.546185	0.590669	0.86221
mctp_sample_35	si_3971	12247049920	12246096913	10302	6481534440	4006773629	1320929719	436848823	0	82350037	447378	1e-06	0.529273	0.327188	0.107865	0.035672	0.856461	0.856395	0.994597	0.539831	0.510223	0.609905	0.781813
mctp_sample_36	si_3972	13205296914	13204209551	11110	7049128566	4182205444	1480825955	492038476	0	86925964	428027	1e-06	0.533855	0.316733	0.112148	0.037264	0.850587	0.850517	0.9951	0.519734	0.47989	0.673774	0.728876
mctp_sample_37	si_3973	14212032695	14210832112	18180	7552623206	4671850220	1519773102	466567408	0	95283453	407101	1e-06	0.531469	0.328753	0.106945	0.032832	0.860222	0.86015	0.995746	0.537414	0.472704	0.632088	0.712637
mctp_sample_38	si_3974	12817865964	12816925554	14544	6703648812	3857089691	1692828789	563343719	0	82604320	516234	1e-06	0.523031	0.300937	0.132078	0.043953	0.823968	0.823908	0.993789	0.532548	0.494452	0.680324	0.757695
mctp_sample_39	si_3975	12125324720	12124391692	4848	7269343486	3990977125	532291245	331774988	0	86625695	287051	0	0.599564	0.329169	0.043903	0.027364	0.928733	0.928661	0.996697	0.521194	0.490491	0.672657	0.757908
mctp_sample_40	si_3976	14576364815	14575424682	10300	7736395662	4326617155	1894605429	617796138	0	93642404	611637	1e-06	0.530784	0.296843	0.129986	0.042386	0.827627	0.827573	0.993511	0.560122	0.446974	0.625871	0.692017
mctp_sample_41	si_3977	12621206137	12620485496	13332	7247539308	3653678892	1242619836	476634129	0	85497660	493804	1e-06	0.574268	0.289504	0.098461	0.037767	0.863772	0.863722	0.994258	0.556966	0.518785	0.627941	0.761741
mctp_sample_42	si_3981	13894627166	13893575327	10706	7230190913	4720818118	1550215790	392339800	0	94976625	356933	1e-06	0.520398	0.339784	0.111578	0.028239	0.860182	0.860117	0.996256	0.559016	0.437055	0.639055	0.667866
mctp_sample_43	si_4156	10486566693	10486110298	8080	5872247069	3418026389	868750238	327078522	0	73625208	403090	1e-06	0.560002	0.325958	0.082848	0.031192	0.88596	0.885921	0.994555	0.575396	0.503323	0.614894	0.733126
mctp_sample_44	si_4157	10291943228	10291345690	11110	5516281768	3348301563	1054991340	371759909	0	70014023	490472	1e-06	0.536012	0.325351	0.102512	0.036124	0.861363	0.861313	0.993043	0.526824	0.55631	0.623218	0.828922
mctp_sample_45	si_4158	9631094370	9630682436	8484	5450035966	3081572897	837623582	261441507	0	66965043	372286	1e-06	0.565903	0.319975	0.086974	0.027147	0.885878	0.88584	0.994471	0.578863	0.505783	0.623229	0.788876
mctp_sample_46	si_4159	10969398809	10968991008	14948	5804570078	3763929141	1015074248	385402593	0	73829511	491051	1e-06	0.52918	0.343143	0.09254	0.035136	0.872323	0.87229	0.993393	0.620728	0.412239	0.589107	0.659433
mctp_sample_47	si_4160	9779100174	9778537596	3232	5847186924	3214464434	475660222	241222784	0	72242597	233375	0	0.597961	0.328726	0.048643	0.024669	0.926688	0.926634	0.99678	0.51606	0.578862	0.719082	0.786259
mctp_sample_48	si_4161	9945556254	9945071930	11110	5848589424	3216901755	624504438	255065203	0	71689097	261536	1e-06	0.588089	0.323467	0.062795	0.025647	0.911556	0.911512	0.996365	0.533272	0.572306	0.679112	0.84165
mctp_sample_49	si_3909	13729478935	13728705216	10100	7885411076	3653541575	1650379851	539362614	0	91397466	483378	1e-06	0.574374	0.266124	0.120214	0.039287	0.840498	0.840451	0.994739	0.54867	0.489492	0.638468	0.762006
mctp_sample_50	si_3910	14068421401	14067580557	11918	7794296143	4034239853	1752623127	486409516	0	92470678	448535	1e-06	0.554061	0.286776	0.124586	0.034577	0.840837	0.840786	0.995173	0.568443	0.409485	0.655287	0.633336
mctp_sample_51	si_4472	9233316879	9232990223	9494	4858889894	3394783350	669626384	309681101	0	62983724	259803	1e-06	0.526253	0.36768	0.072525	0.033541	0.893933	0.893901	0.995892	0.799791	0.258442	0.580992	0.431713
mctp_sample_52	si_4448	5190728047	5190568080	7272	3122906017	1695646001	231438309	140570481	0	38088506	130847	1e-06	0.60165	0.326678	0.044588	0.027082	0.928328	0.9283	0.996576	0.76325	0.326234	0.572501	0.570695
mctp_sample_53	si_4449	6864506107	6864268753	6262	4186558158	2157365829	325006053	195332451	0	48989090	187276	1e-06	0.609906	0.314289	0.047348	0.028456	0.924195	0.924163	0.996192	0.624454	0.488335	0.576084	0.800072
mctp_sample_54	si_4450	5594478779	5594267704	3636	3482885379	1756683822	225921073	128773795	0	41746005	139132	1e-06	0.622581	0.314015	0.040384	0.023019	0.936596	0.936561	0.996678	0.589592	0.501785	0.619292	0.786588
mctp_sample_55	si_4451	6936951185	6936743726	4444	4571066472	1996366662	239111844	130194304	0	51432398	143181	1e-06	0.658964	0.287796	0.03447	0.018769	0.94676	0.946732	0.997224	0.621786	0.49265	0.603124	0.770233
mctp_sample_56	si_4473	8060272882	8060021960	5050	4725902835	2850138662	291205070	192770343	0	58108349	163715	1e-06	0.586339	0.353614	0.03613	0.023917	0.939953	0.939924	0.997191	0.738935	0.323685	0.583919	0.587691
mctp_sample_57	si_4474	7613005189	7612751642	8080	4429941061	2629086372	336630308	217085822	0	54562338	172686	1e-06	0.581911	0.345353	0.044219	0.028516	0.927264	0.927233	0.996845	0.753156	0.30563	0.59895	0.518229
mctp_sample_58	si_4475	8114429082	8114158063	4040	4490553283	3207051868	242971883	173576989	0	58797840	128471	0	0.553422	0.395241	0.029944	0.021392	0.948663	0.948632	0.99782	0.792223	0.25179	0.525736	0.483653
mctp_sample_59	si_4476	6248309248	6248094203	6262	3152243379	2653297082	235265453	207282027	0	45409529	121546	1e-06	0.504513	0.424657	0.037654	0.033175	0.92917	0.929138	0.99733	0.975587	0.111396	0.443318	0.236808
mctp_sample_60	si_4477	5522882606	5522694816	5858	3055815625	1859750111	408730243	198392979	0	38331005	140216	1e-06	0.55332	0.336747	0.074009	0.035923	0.890067	0.890036	0.996355	0.803341	0.281644	0.516321	0.585023
mctp_sample_61	si_5001	18358595573	18357818994	11918	9852145263	6253821358	1674771226	577069232	0	127810546	536391	1e-06	0.536673	0.340663	0.091229	0.031435	0.877336	0.877298	0.995821	0.629116	0.495544	0.538077	0.821492
mctp_sample_62	si_5002	16663660033	16662647464	19594	8448559204	6049705175	1583904231	580459260	0	113231037	634230	1e-06	0.507036	0.36307	0.095057	0.034836	0.870106	0.870053	0.99443	0.535579	0.524454	0.576465	0.837933
mctp_sample_63	si_5003	15352316635	15351553165	20200	8170822726	4327126475	2325553514	528030250	0	99682857	491351	1e-06	0.532247	0.281869	0.151487	0.034396	0.814116	0.814076	0.995095	0.545911	0.607876	0.624894	0.990136
mctp_sample_64	si_5353	7615413736	7614719583	5252	4065307586	2459376014	845448884	244581847	0	51404928	243769	1e-06	0.533875	0.322977	0.111028	0.03212	0.856851	0.856773	0.99528	0.507165	0.395767	0.606937	0.621266
mctp_sample_65	si_5352	5816345782	5815926636	6262	3360005341	1678901112	611500983	165512943	0	40020817	143534	1e-06	0.577725	0.288673	0.105142	0.028459	0.866398	0.866335	0.996426	0.55793	0.510747	0.593363	0.815415
mctp_sample_66	si_5192	16017814220	16017169921	31916	9335412794	4556708492	1621325921	503690799	0	110274369	633398	2e-06	0.582838	0.284489	0.101224	0.031447	0.867327	0.867292	0.994289	0.538777	0.593048	0.544951	0.958955
mctp_sample_67	si_5285	15619750899	15619181451	26058	7510368647	5492608371	2027142673	589035702	0	101773564	529690	2e-06	0.480843	0.351658	0.129785	0.037712	0.832501	0.83247	0.994822	0.609154	0.469528	0.613262	0.740644
mctp_sample_68	si_5486	10444861773	10444518754	9494	6373140311	2856520932	917606521	297241497	0	70540495	384900	1e-06	0.61019	0.273495	0.087855	0.028459	0.883685	0.883656	0.994573	0.656172	0.709101	0.502678	1.34956
mctp_sample_72	si_4504	9286535193	9286077546	9494	5135317432	2825527982	1022018960	303203678	0	63206691	297674	1e-06	0.553013	0.304276	0.110059	0.032651	0.857288	0.857246	0.995313	0.490021	0.584344	0.677293	0.861732
mctp_sample_73	si_4505	8734123672	8733739845	14948	4808315984	2934340820	749573748	241494345	0	60290569	276388	2e-06	0.550545	0.335978	0.085825	0.027651	0.886522	0.886484	0.995437	0.563583	0.465382	0.644383	0.67885
mctp_sample_74	si_4506	8939269014	8938685758	15352	4592831390	2625276168	1374238844	346324004	0	56117979	425535	2e-06	0.513815	0.293698	0.153741	0.038744	0.807513	0.807461	0.992474	0.4841	0.562842	0.616885	0.828062
mctp_sample_75	si_4386	11258708865	11257798469	18786	5669571222	3814505893	1365408174	408294395	0	74288166	426745	2e-06	0.503613	0.338832	0.121286	0.036268	0.842445	0.842377	0.994288	0.462654	0.557086	0.767704	0.73333
mctp_sample_76	si_4385	8626657349	8626121031	10302	4757458316	2908857791	727296584	232498038	0	60187600	271234	1e-06	0.551518	0.337215	0.084313	0.026953	0.888733	0.888677	0.995514	0.538765	0.455052	0.750672	0.589732
mctp_sample_77	si_4507	8415912365	8415525747	7272	5106325978	2551596931	571897526	185698040	0	60536247	183778	1e-06	0.606774	0.303201	0.067957	0.022066	0.909976	0.909934	0.996973	0.52932	0.53522	0.649788	0.748265
mctp_sample_78	si_4384	9219702685	9218964773	10100	4855585460	3066488091	1013166379	283714744	0	63121085	263061	1e-06	0.526695	0.332628	0.1099	0.030775	0.859324	0.859255	0.99585	0.458244	0.542937	0.736772	0.755734
mctp_sample_79	si_4508	8987559841	8987075336	11716	5126747807	2600748146	1001706840	257860827	0	61087217	242618	1e-06	0.570458	0.289388	0.111461	0.028692	0.859845	0.859799	0.996044	0.488914	0.564911	0.658546	0.787542
mctp_sample_80	si_4509	8899455117	8899015027	11918	5084260765	2773247839	805049887	236444618	0	61620714	253442	1e-06	0.571328	0.311635	0.090465	0.02657	0.882964	0.88292	0.995904	0.518311	0.495843	0.651948	0.71909
mctp_sample_82	si_4951	8716124866	8715753752	5454	5122514810	2827741080	554253094	211239314	0	62346184	236696	1e-06	0.587731	0.32444	0.063592	0.024236	0.912171	0.912132	0.996218	0.526898	0.570627	0.581434	0.945473
mctp_sample_81	si_4383	11396824345	11395954181	19392	5847282470	3817163905	1381621024	349867390	0	76537000	341037	2e-06	0.513102	0.334958	0.121238	0.030701	0.848059	0.847995	0.995564	0.474307	0.558692	0.682684	0.766693
mctp_sample_83	si_4510	8977991000	8977424492	9696	4598489127	2808004321	1242840266	328081083	0	58062261	322162	1e-06	0.512228	0.312785	0.138441	0.036545	0.825013	0.824961	0.994482	0.493573	0.597012	0.698245	0.838819
mctp_sample_84	si_4511	8996918198	8996306531	4848	4964027163	3232978219	599934932	199361369	0	64771152	196999	1e-06	0.551785	0.359367	0.066687	0.02216	0.911152	0.91109	0.996968	0.564941	0.423337	0.789296	0.531341
mctp_sample_85	si_4623	8507146776	8506814064	32522	4822216536	2713702002	637162506	333700498	0	59142734	274631	4e-06	0.566865	0.319003	0.0749	0.039227	0.885868	0.885834	0.995378	0.648105	0.455724	0.621259	0.748028
mctp_sample_86	si_4512	10959929251	10959237734	12322	6134280768	3811815258	737985363	275144023	0	76709894	277995	1e-06	0.559736	0.347818	0.067339	0.025106	0.907554	0.907496	0.996389	0.514954	0.466957	0.660125	0.644864
mctp_sample_87	si_4513	8793720338	8793172312	11514	4346760340	3238691842	930887221	276821397	0	59988070	321891	1e-06	0.494334	0.368319	0.105865	0.031481	0.862653	0.862599	0.994663	0.550717	0.459381	0.702903	0.642654
mctp_sample_88	si_4514	7586401082	7585882665	7878	3928276194	2535818057	889435333	232345203	0	50489465	240105	1e-06	0.51784	0.334281	0.117249	0.030629	0.852122	0.852063	0.995267	0.514473	0.535745	0.692832	0.766209
mctp_sample_89	si_4870	13541280888	13540396766	8484	8978969591	3239306870	988950902	333160919	0	97987449	397100	1e-06	0.663125	0.239233	0.073037	0.024605	0.902357	0.902298	0.995964	0.570039	0.637154	0.555473	1.04523
mctp_sample_90	si_4515	10809095245	10808481373	11716	6244333958	3327796526	979579544	256759631	0	76766625	241393	1e-06	0.577725	0.307888	0.090631	0.023755	0.885613	0.885563	0.996865	0.505268	0.599205	0.701018	0.853618
mctp_sample_92	si_4952	9573981799	9573455443	16564	4688944328	2901182825	1612149693	371162033	0	60886855	402045	2e-06	0.489786	0.303044	0.168398	0.03877	0.79283	0.792787	0.99344	0.527056	0.556013	0.588715	0.86843
mctp_sample_91	si_4520	7464651339	7464350103	4444	4048121552	2357665370	854846044	203712693	0	51205297	199155	1e-06	0.542327	0.315857	0.114524	0.027291	0.858184	0.85815	0.996126	0.607326	0.477598	0.688583	0.72916
mctp_sample_94	si_4953	7780413093	7779965867	7878	3968894957	3001807488	600334433	208921112	0	55187947	194241	1e-06	0.510143	0.385838	0.077164	0.026854	0.895981	0.89593	0.996493	0.570849	0.418718	0.651869	0.600861
mctp_sample_93	si_4521	8768033412	8767721537	6262	4360391348	3093656377	993544885	320122665	0	57095872	276067	1e-06	0.497323	0.352846	0.113318	0.036512	0.850169	0.850139	0.995188	0.812263	0.232675	0.617814	0.431449
mctp_sample_95	si_4522	8295207770	8294858691	10908	4138687940	3034704568	835351949	286103326	0	56467052	276974	1e-06	0.498946	0.365854	0.100707	0.034492	0.8648	0.864763	0.995119	0.710072	0.303669	0.704197	0.452516
mctp_sample_96	si_4390	10369424873	10368688174	9494	5305489264	3433365345	1291374247	338449825	0	68359278	356665	1e-06	0.511684	0.331128	0.124546	0.032642	0.842812	0.842752	0.99481	0.469021	0.530564	0.753961	0.703823
mctp_sample_97	si_4389	15460623581	15459283297	15150	7601409809	5834668854	1481032838	542156648	0	106232371	509762	1e-06	0.491705	0.377422	0.095802	0.03507	0.869127	0.869052	0.995224	0.493532	0.47707	0.72184	0.68036
mctp_sample_98	si_4388	8453365589	8452736686	15958	4397067146	2853755304	909622626	292275652	0	57342307	304020	2e-06	0.520195	0.337613	0.107613	0.034578	0.857808	0.857744	0.994726	0.457883	0.529928	0.734084	0.743004
mctp_sample_99	si_4387	7442822310	7442212986	13534	3725947797	2571521366	870046444	274683846	0	49824625	260508	2e-06	0.500651	0.345532	0.116907	0.036909	0.846182	0.846113	0.994799	0.453703	0.494112	0.704409	0.701745
mctp_sample_100	si_4523	8760911397	8760632359	5050	5007007680	2615664823	829106242	308848564	0	60634372	360562	1e-06	0.571535	0.29857	0.09464	0.035254	0.870105	0.870078	0.994089	0.665672	0.482084	0.638901	0.736352
mctp_sample_101	si_4540	9019091839	9018716205	11312	4485772695	2727917679	1449315556	355698963	0	56911445	350718	1e-06	0.497385	0.302473	0.160701	0.03944	0.799858	0.799824	0.993875	0.627716	0.447364	0.70195	0.625376
mctp_sample_102	si_4541	10779575571	10779120643	14948	5042282050	3557879568	1760137665	418806413	0	68293123	464921	1e-06	0.467782	0.330071	0.163291	0.038853	0.797854	0.79782	0.993238	0.653035	0.398637	0.629399	0.605114
mctp_sample_103	si_4394	9518418467	9517624685	20402	4276868311	3134736637	1760495080	345504260	0	57810993	294887	2e-06	0.449363	0.329361	0.184972	0.036302	0.778724	0.778659	0.994925	0.516415	0.42086	0.745461	0.573051
mctp_sample_104	si_4542	10106724378	10106439491	12120	6067109430	2693371291	1085660963	260285687	0	69036380	285067	1e-06	0.600321	0.266501	0.107423	0.025754	0.866822	0.866797	0.995888	0.602463	0.481991	0.641329	0.779179
mctp_sample_105	si_4543	11095628205	11095246268	12928	6118518324	3426108863	1206051874	344554279	0	72861657	304766	1e-06	0.551454	0.308791	0.1087	0.031054	0.860245	0.860215	0.995835	0.722928	0.30925	0.621433	0.503921
mctp_sample_106	si_4954	10409863960	10409433205	15352	5911793112	3108450434	1117104751	272069556	0	70784851	292205	1e-06	0.567927	0.298619	0.107317	0.026137	0.866545	0.866509	0.995889	0.542718	0.528489	0.601818	0.850136
mctp_sample_107	si_4544	9835104674	9834714533	8686	3962263164	3498382916	1834409461	539650306	0	56695390	473353	1e-06	0.402885	0.355718	0.186524	0.054872	0.758603	0.758573	0.99172	0.913809	0.142131	0.593615	0.238516
mctp_sample_108	si_4545	12231091112	12230638439	14544	5385659319	4376637435	1953498667	514828474	0	76089373	432171	1e-06	0.440342	0.357842	0.159722	0.042093	0.798184	0.798154	0.994352	0.810187	0.24123	0.627392	0.370985
mctp_sample_109	si_4546	10655393142	10655022119	9494	5519369553	3272560865	1445203369	417878838	0	70073423	384195	1e-06	0.518006	0.307138	0.135636	0.039219	0.825144	0.825116	0.994547	0.739333	0.302845	0.601764	0.548624
mctp_sample_110	si_4392	9761648283	9760854395	29290	5005747570	3358162468	1060787941	336127126	0	66089363	324521	3e-06	0.512839	0.344044	0.108678	0.034436	0.856883	0.856813	0.995114	0.476138	0.497685	0.698064	0.672495
mctp_sample_111	si_4391	9101213626	9100495413	10100	4396657684	3353421834	1021175231	329230566	0	59611255	338742	1e-06	0.483123	0.368488	0.112211	0.036177	0.851611	0.851544	0.99435	0.582657	0.355442	0.801883	0.446815
mctp_sample_112	si_4547	8180615594	8180301123	13130	3967052487	2807178673	1108908963	297147870	0	53292727	279430	2e-06	0.484952	0.343163	0.135558	0.036325	0.828115	0.828083	0.994784	0.647424	0.395709	0.661728	0.598843
mctp_sample_113	si_4548	9545825726	9545490545	7474	4818543483	3132614168	1267191182	327134238	0	62340866	289949	1e-06	0.504798	0.328177	0.132753	0.034271	0.832975	0.832946	0.995371	0.693416	0.367533	0.628379	0.576898
mctp_sample_114	si_4549	10214224334	10213772280	17574	4833851667	3349234662	1630612344	400056033	0	65007941	390077	2e-06	0.473268	0.327914	0.159648	0.039168	0.801182	0.801146	0.994035	0.60093	0.441104	0.622865	0.661978
mctp_sample_115	si_4575	8431897231	8431465054	17170	4123916703	2916195936	1097013230	294322015	0	55615484	299581	2e-06	0.48911	0.345871	0.130109	0.034908	0.834981	0.834938	0.994642	0.547562	0.478699	0.668772	0.702935
mctp_sample_116	si_4398	10308373706	10307543304	18180	4933201927	3536720411	1471818333	365784454	0	66589830	400335	2e-06	0.478601	0.34312	0.14279	0.035487	0.821721	0.821655	0.994024	0.463267	0.518678	0.717174	0.683219
mctp_sample_117	si_4577	8672819601	8672370326	11716	4051865284	2900205373	1384726018	335561937	0	54127012	324394	1e-06	0.467215	0.334419	0.159671	0.038693	0.801634	0.801593	0.994043	0.552168	0.470602	0.685696	0.668073
mctp_sample_118	si_4578	8022250220	8021929592	13130	3701777191	2682281941	1263556037	374301293	0	49118749	420222	2e-06	0.461457	0.334369	0.157513	0.04666	0.795826	0.795794	0.991517	0.685761	0.377548	0.651165	0.564618
mctp_sample_119	si_4397	9328646032	9327881308	22422	4423600802	3174475634	1391586661	338195790	0	58883664	363341	2e-06	0.474234	0.340321	0.149186	0.036256	0.814555	0.814489	0.993867	0.493927	0.460907	0.743657	0.623356
mctp_sample_120	si_4579	8013763089	8013511716	5454	4602273097	2478211248	706421983	226599935	0	55446803	198948	1e-06	0.574314	0.309254	0.088154	0.028277	0.883568	0.883541	0.996425	0.649842	0.429486	0.642648	0.646084
mctp_sample_121	si_4396	9201888305	9201062618	16564	4354768279	3360217728	1158568500	327491547	0	60609948	293387	2e-06	0.47329	0.365199	0.125917	0.035593	0.838489	0.838413	0.995183	0.522699	0.419509	0.848678	0.526469
mctp_sample_122	si_4580	9462432854	9462120872	10302	4842658127	2958492063	1337149867	323810513	0	60333056	283848	1e-06	0.511794	0.312667	0.141316	0.034222	0.824461	0.824434	0.995317	0.785864	0.290083	0.609278	0.48207
mctp_sample_123	si_4581	8890877389	8890459292	10908	4292660174	2925159721	1294377334	378251156	0	56224630	407121	1e-06	0.482839	0.329022	0.145592	0.042546	0.811861	0.811823	0.992811	0.663916	0.418079	0.666907	0.648468
mctp_sample_124	si_4582	8804404522	8804019799	13332	4148286390	2887481141	1416356255	351882682	0	55347317	389013	2e-06	0.471181	0.327973	0.160876	0.039968	0.799154	0.799119	0.99302	0.700193	0.366601	0.699488	0.527558
mctp_sample_125	si_4583	9384204617	9383831155	13534	4425812674	3246364638	1341098632	370541677	0	60180826	327271	1e-06	0.471642	0.345953	0.142916	0.039487	0.817595	0.817563	0.994591	0.725116	0.342077	0.612964	0.580845
mctp_sample_126	si_4395	9360553245	9359762376	17776	4386370296	3070040454	1567643032	335690823	0	58403159	362242	2e-06	0.468641	0.328004	0.167487	0.035865	0.796645	0.796578	0.993836	0.454067	0.530083	0.718922	0.714352
mctp_sample_127	si_4584	8604893061	8604551115	5050	4363254546	2707082228	1221080068	313129223	0	56614167	300810	1e-06	0.507087	0.314611	0.141911	0.036391	0.821697	0.821665	0.994715	0.732694	0.34354	0.631353	0.594895
mctp_sample_128	si_4585	9031271934	9030845487	14544	4326220157	2869025000	1502742613	332843175	0	56932865	339468	2e-06	0.479049	0.317692	0.166401	0.036856	0.796741	0.796703	0.994073	0.637288	0.432075	0.617392	0.684602
mctp_sample_129	si_4586	8105702076	8105397823	13534	3786972106	2579549202	1401686483	337176500	0	49800740	334717	2e-06	0.467216	0.318251	0.172932	0.041599	0.785467	0.785437	0.993324	0.743124	0.304538	0.624398	0.547134
mctp_sample_130	si_4411	7538958150	7538437465	7272	4111404490	2666417309	590823830	169784565	0	53208802	162651	1e-06	0.545392	0.35371	0.078375	0.022523	0.899102	0.89904	0.996952	0.500243	0.471752	0.748999	0.612944
mctp_sample_131	si_4412	7850766966	7850245802	17776	4109008484	2570822387	885196890	285200266	0	52271840	317686	2e-06	0.523424	0.327483	0.11276	0.03633	0.850907	0.850851	0.993959	0.489242	0.506993	0.7529	0.67531
mctp_sample_132	si_4413	6710186086	6709745129	7474	3544197852	2325097260	633859667	206582876	0	46557195	216715	1e-06	0.528216	0.346525	0.094469	0.030788	0.874742	0.874684	0.995367	0.502821	0.52093	0.651361	0.759638
mctp_sample_133	si_4414	9471653346	9470920461	13332	4680010846	3230791983	1283088686	277015614	0	62636963	255129	1e-06	0.494145	0.341128	0.135477	0.029249	0.835273	0.835208	0.995943	0.493766	0.472756	0.772659	0.632307
mctp_sample_134	si_4415	7668150482	7667661669	8484	4284183187	2483271160	681285129	218913709	0	51518106	208148	1e-06	0.558734	0.323863	0.088852	0.02855	0.882597	0.882541	0.995976	0.496371	0.482446	0.668971	0.696074
mctp_sample_135	si_4416	8934127205	8933431274	13130	4718431814	3017813366	922222310	274950654	0	61138115	261147	1e-06	0.528177	0.337811	0.103233	0.030778	0.865988	0.865921	0.995747	0.487726	0.511857	0.700207	0.690735
mctp_sample_136	si_4417	9082346018	9081697481	15150	4453064654	3313189461	1002852550	312575666	0	61084673	280895	2e-06	0.490334	0.364821	0.110426	0.034418	0.855154	0.855093	0.995423	0.537235	0.407255	0.756099	0.518073
mctp_sample_137	si_4418	8978819907	8978136576	8888	4520876872	3444000042	735840637	277410139	0	62651362	256582	1e-06	0.503543	0.383599	0.081959	0.030898	0.887141	0.887074	0.995921	0.576665	0.355658	0.792742	0.466506
mctp_sample_138	si_4419	9626792780	9626110089	10504	4779346465	3494494902	1065215060	287043158	0	65502335	298269	1e-06	0.496498	0.363023	0.110659	0.029819	0.859521	0.85946	0.995467	0.489573	0.529449	0.726504	0.702761
mctp_sample_139	si_4420	8968336410	8967715754	11514	4486657631	3318894833	889093570	273058207	0	61226706	285360	1e-06	0.500312	0.370094	0.099144	0.030449	0.870406	0.870346	0.995361	0.51955	0.453115	0.772518	0.578803
mctp_sample_140	si_4421	8907358569	8906722368	17372	4167518054	3021659639	1293604455	423922848	0	56666829	419364	2e-06	0.467907	0.339256	0.145239	0.047596	0.807163	0.807105	0.992654	0.476092	0.546005	0.737168	0.750124
mctp_sample_141	si_4422	8929292941	8928679174	9494	4709175944	3155451210	814399946	249642580	0	62204784	264112	1e-06	0.527421	0.353406	0.091212	0.02796	0.880828	0.880767	0.995772	0.490652	0.496081	0.747578	0.677225
mctp_sample_142	si_4955	9005022438	9004606366	10100	5113782460	2724550323	885773878	280489605	0	60510740	336026	1e-06	0.567907	0.302573	0.098369	0.03115	0.87048	0.87044	0.994478	0.541076	0.536002	0.600449	0.818548
mctp_sample_143	si_4906	10467539909	10467023260	7676	5739865591	3542565888	825994087	358590018	0	71658525	399302	1e-06	0.548376	0.33845	0.078914	0.034259	0.886826	0.886783	0.994459	0.536791	0.500103	0.63752	0.751786
mctp_sample_144	si_4908	10180617796	10180343588	6868	6177055763	2807969332	962608021	232703604	0	71799892	237203	1e-06	0.606763	0.275823	0.094556	0.022858	0.882586	0.882562	0.996707	0.585206	0.590871	0.581973	0.941927
mctp_sample_145	si_4717	8214007406	8213744494	5656	4854367770	2582766917	542677798	233926353	0	58850243	267851	1e-06	0.591005	0.314445	0.066069	0.02848	0.90545	0.905421	0.995469	0.668605	0.435504	0.622299	0.739088
mctp_sample_146	si_4718	8866297120	8866008920	7474	5263912024	2941391662	448452599	212245161	0	63401250	187991	1e-06	0.593718	0.331761	0.050581	0.023939	0.925479	0.925449	0.997044	0.73601	0.335885	0.545522	0.597975
mctp_sample_147	si_4719	9757793315	9757494815	11716	5811053746	3222376554	456077351	267975448	0	71446802	175080	1e-06	0.595548	0.330246	0.046741	0.027464	0.925794	0.925766	0.997555	0.762841	0.301215	0.553471	0.586024
mctp_sample_148	si_4530	11123625506	11123147437	9292	6337390998	3628965505	760471945	396309697	0	78499835	433604	1e-06	0.569748	0.326253	0.068368	0.035629	0.896001	0.895963	0.994507	0.569155	0.522813	0.681191	0.766423
mctp_sample_149	si_4624	9313080013	9312784629	6262	5206855395	3069339869	717636894	318946209	0	63950324	231055	1e-06	0.559108	0.329583	0.077059	0.034248	0.888692	0.888664	0.9964	0.849996	0.21087	0.543658	0.377959
mctp_sample_150	si_4633	11145298591	11144925437	9090	6937085737	3327826186	580705251	299299173	0	82050770	253196	1e-06	0.622443	0.298596	0.052105	0.026855	0.921039	0.921008	0.996924	0.666741	0.464252	0.649448	0.719249
mctp_sample_151	si_4527	9545136603	9544722784	6464	5919293894	2977078613	414599641	233744172	0	70788384	212504	1e-06	0.620164	0.311908	0.043438	0.024489	0.932072	0.932032	0.997007	0.536257	0.604611	0.677923	0.847585
mctp_sample_152	si_4529	10101136553	10100780875	7474	5996766445	3429881534	413666721	260458701	0	72993945	229189	1e-06	0.593693	0.339566	0.040954	0.025786	0.933259	0.933226	0.99687	0.683563	0.426565	0.604921	0.685945
mctp_sample_153	si_4628	8269133711	8268961269	4040	5503188714	2191842408	364702421	209223686	0	61405523	190006	0	0.665524	0.265069	0.044105	0.025302	0.930592	0.930573	0.996915	0.636659	0.480383	0.604843	0.776029
mctp_sample_154	si_4526	9616603698	9616291960	7272	5829286422	2798003439	752536660	236458167	0	68933499	242442	1e-06	0.606189	0.290965	0.078256	0.024589	0.897153	0.897124	0.996495	0.641318	0.496288	0.652988	0.788062
mctp_sample_155	si_4632	9328615732	9328337701	5656	5945150476	2785231677	383519659	214430233	0	69371058	184500	1e-06	0.637322	0.298577	0.041113	0.022987	0.935899	0.935871	0.997347	0.717655	0.398524	0.588239	0.651241
mctp_sample_156	si_4629	8234479702	8234258700	11514	4663802524	2393833315	842907146	333704201	0	56201989	295163	1e-06	0.56639	0.290716	0.102366	0.040526	0.857106	0.857083	0.994776	0.746158	0.299195	0.541723	0.539961
mctp_sample_157	si_4630	7261060690	7260874972	10302	4021292497	2191785547	760666549	287120077	0	49135877	213629	1e-06	0.55383	0.301862	0.104762	0.039543	0.855693	0.855671	0.995671	0.820551	0.259827	0.515472	0.476355
mctp_sample_158	si_4903	13089409615	13089139098	4646	9633219902	2725898028	500623512	229393010	0	100246504	269784	0	0.73597	0.208256	0.038247	0.017525	0.944227	0.944207	0.997316	0.607225	0.605152	0.450007	1.22403
mctp_sample_159	si_4631	8763276615	8762994068	6666	4864122866	3108733809	489239130	300891597	0	62852014	230619	1e-06	0.555075	0.354757	0.05583	0.034337	0.909832	0.909803	0.996344	1.01032	0.111496	0.533411	0.208635
mctp_sample_160	si_4528	8368822125	8368438150	2222	5372915729	2436730611	366373012	192416576	0	61495091	204833	0	0.642045	0.291181	0.04378	0.022993	0.933226	0.933183	0.99668	0.531419	0.652963	0.660189	0.98775
mctp_sample_161	si_4524	9883799400	9883491675	5858	6094454584	2794380006	651086348	343564879	0	70138675	360697	1e-06	0.61663	0.282732	0.065876	0.034761	0.899362	0.899334	0.994884	0.635674	0.521902	0.660475	0.815314
mctp_sample_162	si_4525	11772025407	11771644200	5050	7142187917	3493806636	841327681	294316916	0	84509821	320378	0	0.606728	0.296799	0.071471	0.025002	0.903527	0.903497	0.996223	0.606849	0.521516	0.699001	0.793742
mctp_sample_163	si_4625	7283488952	7283248400	7070	4317306899	2228834995	529322863	207776573	0	51647548	180159	1e-06	0.592772	0.306022	0.072677	0.028528	0.898794	0.898765	0.996524	0.69334	0.425562	0.589211	0.697594
mctp_sample_164	si_4531	12420163819	12419695672	15756	7364040133	3317760284	1258401619	479477880	0	83996057	499338	1e-06	0.592932	0.267137	0.101323	0.038606	0.860069	0.860037	0.99409	0.586	0.564466	0.662962	0.850359
mctp_sample_165	si_4909	11396416911	11396002686	9090	7361813273	3094825051	594839581	344515691	0	82058649	356381	1e-06	0.646	0.271571	0.052197	0.030231	0.917571	0.917537	0.995676	0.5272	0.676257	0.578769	1.15298
mctp_sample_166	si_4869	9253758875	9253133449	9090	5574038500	2312290944	1010033309	356761607	0	62301441	428139	1e-06	0.602395	0.249893	0.109156	0.038556	0.852287	0.85223	0.993175	0.568357	0.607137	0.578327	0.984007
mctp_sample_167	si_4627	10240256983	10239942373	6464	6519886583	3033861350	393558024	292629952	0	74496366	201338	1e-06	0.636711	0.296277	0.038434	0.028577	0.932988	0.93296	0.997305	0.625651	0.469155	0.662367	0.678341
mctp_sample_168	si_4622	9368423771	9368128096	9090	5715012229	2742633092	602312804	308160881	0	66074949	369039	1e-06	0.610048	0.292762	0.064294	0.032895	0.902811	0.902782	0.994446	0.722509	0.38215	0.613559	0.640043
mctp_sample_169	si_4905	12964229609	12963973055	7272	8617371120	3477846715	639563444	229184504	0	95750901	312729	1e-06	0.664717	0.26827	0.049334	0.017679	0.932987	0.932968	0.996745	0.589834	0.500856	0.512826	0.907531
mctp_sample_171	si_4715	8346867048	8346630425	8686	4759299083	2604039315	764058690	219224651	0	57661670	210067	1e-06	0.570206	0.311987	0.091541	0.026265	0.882193	0.882168	0.99637	0.680182	0.406029	0.5615	0.776608
mctp_sample_172	si_4716	7094334233	7094158737	10302	4204882074	2150940253	564805109	173520999	0	49330587	150543	1e-06	0.592725	0.303199	0.079616	0.02446	0.895923	0.895901	0.996958	0.68588	0.379557	0.581159	0.645172
mctp_sample_170	si_4708	8168338034	8168076955	12322	4413143928	2676547506	709780961	368592238	0	55999069	388441	2e-06	0.540292	0.327684	0.086897	0.045126	0.867976	0.867948	0.993111	0.710953	0.375196	0.511055	0.676815
mctp_sample_173	si_4709	8407156473	8406895014	7878	4632932932	2961253104	572591790	240109310	0	58055332	215729	1e-06	0.551087	0.352241	0.06811	0.028561	0.903328	0.9033	0.996298	0.756304	0.307333	0.513835	0.555543
mctp_sample_174	si_4710	7026039346	7025828077	7272	3929378148	2387892998	511480873	197068786	0	47419918	169917	1e-06	0.559276	0.339874	0.0728	0.028049	0.89915	0.899123	0.99643	0.746442	0.336412	0.527243	0.634243
mctp_sample_175	si_4711	7182810940	7182510951	4848	3293683214	2694614573	911152661	283055664	0	45929094	317037	1e-06	0.45857	0.375163	0.126857	0.039409	0.833733	0.833698	0.993145	0.718062	0.297098	0.568968	0.510575
mctp_sample_176	si_4713	8591141406	8590839887	15958	4642389047	2911947569	754598836	281888478	0	58904374	263124	2e-06	0.540388	0.33896	0.087838	0.032813	0.879348	0.879317	0.995553	0.653767	0.431401	0.567847	0.769278
mctp_sample_178	si_4714	7647668490	7647400530	3030	4108653259	2740086273	582782226	215875742	0	54316512	213673	0	0.537261	0.358303	0.076207	0.028229	0.895564	0.895533	0.996082	0.663171	0.427252	0.565389	0.807496
mctp_sample_177	si_4873	10791767887	10791401337	12726	6438597085	2963781029	1084735007	304275491	0	74907030	294208	1e-06	0.596641	0.274643	0.100518	0.028196	0.871284	0.871255	0.996088	0.591663	0.52921	0.595311	0.876954
mctp_sample_179	si_4796	11306170583	11305602169	15554	6165814940	3522908139	1304797327	312066210	0	76978401	307067	1e-06	0.545377	0.311607	0.115412	0.027603	0.856984	0.856941	0.996027	0.548518	0.572898	0.622396	0.868763
mctp_sample_180	si_4874	10569477492	10569085815	17574	5539644138	3039697517	1638066941	351659648	0	68116730	324250	2e-06	0.524137	0.287603	0.154987	0.033272	0.811739	0.811709	0.995262	0.616333	0.458315	0.626038	0.684214
mctp_sample_181	si_4797	11612886878	11612496866	16160	6611819863	3054549393	1633250991	312860461	0	75808493	285091	1e-06	0.569371	0.26304	0.140646	0.026942	0.832411	0.832383	0.996253	0.666664	0.411421	0.663472	0.654015
mctp_sample_182	si_4875	10321791253	10321414010	14544	5767196626	2815448511	1394200570	344553763	0	67182718	398091	1e-06	0.55876	0.272777	0.135078	0.033382	0.831538	0.831507	0.994109	0.601932	0.500403	0.609846	0.840559
mctp_sample_183	si_4790	11120699031	11119895802	20402	5764342631	3494848039	1499206255	361478475	0	72714749	343060	2e-06	0.518381	0.314288	0.134822	0.032507	0.832669	0.832609	0.995304	0.466544	0.600147	0.682074	0.83206
mctp_sample_185	si_4798	10136090229	10135494140	13130	5616596867	3013991897	1122517416	382374830	0	68575517	378634	1e-06	0.554151	0.29737	0.110751	0.037726	0.851521	0.851471	0.994509	0.509931	0.60256	0.628428	0.930382
mctp_sample_186	si_4799	10818776196	10818333568	17170	5576379892	3288005848	1493793034	460137626	0	71076975	385285	2e-06	0.515456	0.303929	0.13808	0.042533	0.819386	0.819352	0.994609	0.663274	0.402829	0.653996	0.639707
mctp_sample_187	si_4800	9889404496	9888998119	9090	5463275481	3012878853	1129790266	283044429	0	66065769	278182	1e-06	0.55246	0.30467	0.114247	0.028622	0.85713	0.857095	0.995807	0.584486	0.494217	0.634122	0.766788
mctp_sample_188	si_4876	8819947412	8819241180	10706	5439730969	2472068803	717178479	190252226	0	61873920	192241	1e-06	0.616803	0.280304	0.08132	0.021572	0.897107	0.897035	0.996903	0.550457	0.548285	0.61637	0.832977
mctp_sample_189	si_4877	17774902736	17773595793	14140	12035616870	4068110921	1193501641	476352221	0	129328926	525735	1e-06	0.677163	0.228885	0.06715	0.026801	0.906048	0.905981	0.995951	0.585701	0.583625	0.528161	0.965659
mctp_sample_190	si_4892	8495739533	8495512522	8888	5765618627	1989802666	573440637	166641704	0	61988748	237026	1e-06	0.678666	0.234218	0.067499	0.019615	0.912884	0.91286	0.996191	0.578942	0.599787	0.493459	1.07985
mctp_sample_191	si_4889	8911861856	8911112044	8484	5547199464	2227972604	882066198	253865294	0	61796513	324421	1e-06	0.622504	0.250022	0.098985	0.028489	0.872525	0.872452	0.994778	0.541747	0.640731	0.583632	1.02748
mctp_sample_192	si_4890	10775845944	10775622495	7272	7621809828	2495854065	475282277	182669053	0	78848290	209772	1e-06	0.70732	0.23162	0.044107	0.016952	0.93894	0.938921	0.997347	0.614848	0.500475	0.499328	0.915298
mctp_sample_193	si_4891	5618002184	5617875199	5050	3759431059	1306672979	431395653	120370459	0	40493776	134965	1e-06	0.669191	0.232592	0.07679	0.021426	0.901783	0.901763	0.996678	0.617177	0.590675	0.53325	1.08609
mctp_sample_184	si_4791	9887856974	9887458409	9696	5658625539	2955015656	970854594	302952924	0	69073502	268185	1e-06	0.572303	0.298865	0.098191	0.03064	0.871168	0.871133	0.996132	0.615865	0.486939	0.644813	0.786345
mctp_sample_194	si_4893	8138315885	8138091532	5858	5383681356	2046769081	543009442	164625795	0	59545648	197446	1e-06	0.661541	0.251505	0.066724	0.020229	0.913046	0.913021	0.996695	0.556746	0.59211	0.653672	0.905263
mctp_sample_195	si_4894	8843225286	8843010125	8686	5686542993	2186969635	759044358	210444453	0	63054582	273731	1e-06	0.643055	0.247311	0.085836	0.023798	0.890366	0.890344	0.995678	0.598582	0.559898	0.570054	0.936027
mctp_sample_196	si_4895	8075722953	8075417590	9090	4793258893	2492920921	605825515	183403172	0	58253428	184634	1e-06	0.593562	0.308705	0.075021	0.022711	0.902267	0.902233	0.996841	0.538566	0.576831	0.634734	0.886679
mctp_sample_197	si_4896	7730655140	7730413566	6666	4910005323	1971503385	648488752	200409440	0	55142074	231899	1e-06	0.635154	0.255032	0.083888	0.025925	0.890186	0.890159	0.995812	0.549576	0.596804	0.610515	0.913841
mctp_sample_198	si_4897	10252623322	10252117054	25048	5792636715	3104083300	1034442439	320929553	0	69943354	314249	2e-06	0.565019	0.302775	0.1009	0.031304	0.867793	0.867751	0.995527	0.531229	0.599592	0.647433	0.932996
mctp_sample_199	si_4898	10017248276	10016701373	15554	5428607498	3016658564	1250704777	320714980	0	65951263	323842	2e-06	0.541956	0.301163	0.124862	0.032018	0.843118	0.843072	0.995114	0.53304	0.594794	0.651904	0.911655
mctp_sample_200	si_4901	10345100134	10344696339	22220	6336013441	2830854365	913606771	264199542	0	72374326	270276	2e-06	0.612489	0.273653	0.088316	0.02554	0.886142	0.886107	0.996279	0.510375	0.63758	0.595183	1.04029
mctp_sample_201	si_4902	10308571161	10308130884	17978	6191101827	2924817921	959919943	232273217	0	71493506	235305	2e-06	0.600604	0.283739	0.093123	0.022533	0.884343	0.884305	0.99672	0.485579	0.608179	0.595436	0.941602
mctp_sample_202	si_4899	10826460781	10826195755	8282	7067837807	2628525491	896061692	233762483	0	77292817	263577	1e-06	0.652846	0.242793	0.082768	0.021592	0.895639	0.895617	0.996601	0.607633	0.544947	0.560923	0.957217
mctp_sample_203	si_4910	9716761156	9716476326	12322	6236250447	2345928985	838429140	295855432	0	69046185	281421	1e-06	0.641822	0.241438	0.086289	0.030449	0.88326	0.883235	0.995941	0.566135	0.582581	0.546312	0.9635
mctp_sample_204	si_4911	10641745921	10641229827	11110	6069286995	3084708451	1164757679	322465594	0	73225685	311374	1e-06	0.570356	0.289883	0.109457	0.030303	0.860238	0.860197	0.995766	0.52181	0.587492	0.628703	0.910934
mctp_sample_205	si_4900	11400750518	11400479708	26462	7223964614	2720033748	1152409277	304045612	0	80077580	392094	2e-06	0.633654	0.238589	0.101084	0.02667	0.872244	0.872223	0.995127	0.575131	0.577457	0.518391	1.0351
mctp_sample_206	si_4907	12819149472	12818818966	11514	8082266578	3170553591	1191670081	374317204	0	90244068	499252	1e-06	0.6305	0.247336	0.092963	0.029201	0.877836	0.877813	0.994498	0.610264	0.546883	0.511036	0.919371
mctp_sample_207	si_4959	7365636898	7365368285	9898	4491430734	1959943651	700353193	213630809	0	51345201	229034	1e-06	0.609804	0.266103	0.095087	0.029005	0.875907	0.875875	0.995559	0.556508	0.541892	0.615172	0.868039
mctp_sample_208	si_4960	7222369408	7222185428	4040	4806605449	1830776827	449210114	135588998	0	53758271	170393	1e-06	0.665533	0.253493	0.062199	0.018774	0.919027	0.919003	0.99684	0.599642	0.527835	0.611347	0.88438
mctp_sample_209	si_4961	7060076346	7059798105	8686	4408393390	1802793367	659105845	189496818	0	49391403	202228	1e-06	0.624436	0.25536	0.09336	0.026842	0.879797	0.879762	0.995922	0.546623	0.547036	0.641266	0.846638
mctp_sample_210	si_4792	10375246412	10374841008	23028	6190324180	2807005105	1030513039	346975656	0	71215619	321014	2e-06	0.596667	0.270559	0.099328	0.033444	0.867226	0.867192	0.995513	0.558028	0.580869	0.644719	0.89286
mctp_sample_211	si_4793	11463659176	11462930052	14544	6289617049	3427322751	1326789074	419186634	0	76485423	464005	1e-06	0.548692	0.298992	0.115746	0.036569	0.847684	0.84763	0.99397	0.486141	0.608563	0.651799	0.885271
mctp_sample_212	si_4794	10743883888	10743326378	14746	5990243289	3147862491	1251570768	353635085	0	71942337	307213	1e-06	0.557578	0.293006	0.116498	0.032917	0.850584	0.85054	0.995748	0.514105	0.560924	0.648426	0.888596
mctp_sample_213	si_4795	12660044677	12659325128	61206	6989530301	3732158427	1488288311	449286883	0	84771306	396011	5e-06	0.552125	0.294815	0.117565	0.035491	0.84694	0.846892	0.99535	0.489311	0.606319	0.680764	0.886346
mctp_sample_214	si_4956	8256500025	8256280031	6666	5559975683	2048814551	463046545	184436586	0	61600186	222705	1e-06	0.673424	0.248152	0.056084	0.022339	0.921576	0.921552	0.996398	0.615333	0.513804	0.543552	0.92138
mctp_sample_215	si_4957	11461869254	11461294115	14140	6250586269	3716793153	1130604339	363296215	0	79183498	379970	1e-06	0.545365	0.324291	0.098645	0.031698	0.869656	0.869612	0.995224	0.520112	0.554857	0.62053	0.83307
mctp_sample_216	si_4958	10826134551	10825720598	13332	6281990678	3413798268	820472190	309446133	0	77458247	309076	1e-06	0.580284	0.315341	0.075789	0.028584	0.895625	0.895591	0.996026	0.556454	0.546609	0.608563	0.884814
mctp_sample_217	si_4871	14458894976	14458112706	10504	10395835786	2836151895	969792641	256321881	0	107906684	411272	1e-06	0.719031	0.196163	0.067076	0.017729	0.915195	0.915145	0.996203	0.638839	0.554224	0.503392	1.13953
mctp_sample_218	si_4904	10987332369	10987058629	3838	7839786940	2489073959	382348517	275845375	0	83572097	249135	0	0.713547	0.226546	0.0348	0.025106	0.940093	0.94007	0.997028	0.537601	0.69014	0.568607	1.18609
mctp_sample_219	si_4872	12119016462	12118504889	15958	7545832136	3168514219	1066060734	338081842	0	86053502	362428	1e-06	0.62267	0.261461	0.08797	0.027898	0.884131	0.884094	0.995806	0.513643	0.676934	0.590865	1.07145
mctp_sample_220	si_5388	4721440839	4721132411	4444	2540465099	1640877461	379633718	160151689	0	32856632	146072	1e-06	0.538105	0.34756	0.080412	0.033922	0.885665	0.885607	0.995574	0.493227	0.596896	0.555599	0.908837
mctp_sample_221	si_5389	5969872448	5969543015	13332	3226431516	2007649943	531400702	204047527	0	41509808	188583	2e-06	0.540482	0.336316	0.089019	0.034181	0.876798	0.876749	0.995477	0.498854	0.581246	0.613634	0.81584
mctp_sample_222	si_5390	5298851880	5298538421	6868	2918984930	1806624306	385117365	187804952	0	37481684	180360	1e-06	0.550904	0.340967	0.072684	0.035445	0.89187	0.891818	0.995211	0.509303	0.590482	0.619839	0.908705
mctp_sample_223	si_5391	5986684403	5986232281	8484	3217524584	2036323406	562709971	169665838	0	42150905	174027	1e-06	0.537487	0.340168	0.094001	0.028343	0.877655	0.877589	0.995888	0.454354	0.62676	0.589033	0.938336
mctp_sample_224	si_5392	6185789440	6185397139	7272	3188440346	2148472362	624718150	223759010	0	41980388	204676	1e-06	0.515479	0.347346	0.100999	0.036175	0.862825	0.86277	0.995148	0.502716	0.537053	0.550701	0.838135
mctp_sample_225	si_5393	5434460944	5434145533	5454	2827285971	1919201937	506284030	181368141	0	38055605	178267	1e-06	0.520282	0.353175	0.093167	0.033376	0.873456	0.873405	0.995337	0.513778	0.524478	0.537687	0.829842
mctp_sample_226	si_5394	4985903885	4985607114	6060	2529619428	1915981907	383353987	156645732	0	34519057	155816	1e-06	0.507384	0.384303	0.076892	0.03142	0.891687	0.891634	0.995506	0.564228	0.436708	0.525405	0.729452
mctp_sample_227	si_5395	6521834317	6521403607	10302	3302827051	2224339901	761813515	232412838	0	43677112	228187	2e-06	0.50646	0.341083	0.116817	0.035638	0.847543	0.847487	0.994803	0.469341	0.612401	0.680913	0.866417
mctp_sample_228	si_5384	5903540698	5903148149	8686	3018140411	2032296546	636195383	216507123	0	39870308	223170	1e-06	0.511276	0.344273	0.107772	0.036677	0.85555	0.855493	0.994434	0.463434	0.633004	0.695429	0.879364
mctp_sample_229	si_5385	5669012739	5668686216	8282	2996819403	1882782366	602163694	186912471	0	38603929	193104	1e-06	0.528662	0.332137	0.106226	0.032973	0.860799	0.86075	0.995023	0.50824	0.590446	0.536922	0.884948
mctp_sample_230	si_5386	5529382461	5529004605	6262	2869183638	2108190083	384077033	167547591	0	39561939	165836	1e-06	0.518933	0.381296	0.069466	0.030303	0.90023	0.900168	0.995826	0.498809	0.54891	0.590673	0.854145
mctp_sample_231	si_5387	5656738613	5656397976	7070	2980177200	1937089218	551427649	187696839	0	39718205	191144	1e-06	0.526868	0.34246	0.097487	0.033183	0.869328	0.869276	0.995211	0.490107	0.557715	0.560242	0.853179
mctp_sample_232	si_4154	14211242136	14210158363	20800	6735312367	4707589837	1785870308	981365051	0	86494490	740387	1e-06	0.473979	0.331283	0.125676	0.069061	0.805262	0.805201	0.991513	0.532571	0.477103	0.646661	0.710012
mctp_sample_233	si_4348	15125247526	15124098260	31108	7182675825	5423928320	2039495625	477967382	0	98742190	563548	2e-06	0.474916	0.358628	0.134851	0.031603	0.833544	0.833481	0.994325	0.505429	0.479332	0.652022	0.655033
mctp_sample_234	si_4349	12450926298	12449877658	14746	5311282812	4507739674	1974240808	656599618	0	76285289	691346	1e-06	0.426613	0.362071	0.158575	0.052739	0.788684	0.788618	0.991019	0.601061	0.35264	0.765138	0.436869
mctp_sample_235	si_4441	8021511001	8020910601	21008	3964170731	2788196492	994846489	273675883	0	53147787	307961	3e-06	0.49423	0.347616	0.124032	0.03412	0.841845	0.841782	0.994239	0.607428	0.406205	0.694632	0.569905
mctp_sample_236	si_4442	10106558839	10105782626	27876	5753699963	2606974983	1383059546	362020258	0	65784627	445012	3e-06	0.569347	0.257969	0.136858	0.035823	0.827316	0.827252	0.993281	0.517302	0.537753	0.673	0.801466
mctp_sample_237	si_4443	2602060576	2601855870	9494	862647275	840795142	592470628	305933331	0	13017605	218223	4e-06	0.331551	0.323152	0.227711	0.117583	0.654703	0.654651	0.983513	0.816895	0.296235	0.708844	0.450398
mctp_sample_238	si_4736	10091064227	10090598940	10100	5453771248	3248854706	1053842344	334120542	0	68849291	322760	1e-06	0.54048	0.321968	0.104438	0.033112	0.862449	0.862409	0.995334	0.667841	0.406062	0.617551	0.62909
mctp_sample_239	si_4850	13911370542	13910292356	24644	6417644738	4605190107	2144376430	743056441	0	86469894	854875	2e-06	0.461359	0.331064	0.154158	0.053418	0.792423	0.792362	0.99021	0.536755	0.528667	0.61146	0.813003
mctp_sample_240	si_4851	15885168193	15884209699	32724	7425982422	5968347364	1909267693	580579496	0	105925339	644240	2e-06	0.467507	0.375741	0.120199	0.036551	0.843248	0.843197	0.993955	0.558751	0.465226	0.583394	0.763022
mctp_sample_241	si_4852	13466753392	13464948131	13736	6411605290	4768715414	1688417780	596195912	0	88284251	589069	1e-06	0.47617	0.354158	0.125394	0.044278	0.830328	0.830216	0.993372	0.581719	0.43715	0.542485	0.730532
mctp_sample_242	si_4924	23373147704	23371903275	25856	12407005716	6841938263	3356501309	766432131	0	151913403	1044921	1e-06	0.530851	0.292742	0.143613	0.032793	0.823593	0.823549	0.993169	0.514011	0.670319	0.662777	1.00317
mctp_sample_243	si_4853	16430963911	16429915786	33128	8046808376	5156420247	2549699512	676954530	0	104297502	743854	2e-06	0.489766	0.313843	0.155186	0.041203	0.803609	0.803558	0.992918	0.48289	0.625999	0.649405	0.984102
mctp_sample_244	si_5256	14752713167	14752274774	10504	7551193546	4753901652	1823683610	623485463	0	96804144	652272	1e-06	0.511866	0.322249	0.123621	0.042264	0.834115	0.83409	0.993307	0.648857	0.481005	0.57003	0.814089
mctp_sample_245	si_4925	19052075915	19051132190	19392	10048471383	6374533990	2017917544	610189881	0	130998850	706512	1e-06	0.527447	0.334601	0.105921	0.032029	0.862049	0.862006	0.994636	0.545924	0.501181	0.624128	0.77735
mctp_sample_246	si_4926	18069827180	18068669922	28684	7582475286	5851887551	3646721736	987556666	0	104969973	1303941	2e-06	0.419648	0.323869	0.201826	0.054656	0.743517	0.743469	0.98773	0.51553	0.551979	0.702272	0.777667
mctp_sample_247	si_4965	8185244626	8184731982	7676	4052001208	2859389393	957657474	315676231	0	54436412	377736	1e-06	0.495068	0.349357	0.117005	0.038569	0.844425	0.844372	0.993109	0.566638	0.453603	0.633947	0.666329
mctp_sample_248	si_5026	14280530794	14279756497	18786	7058429475	4897835827	1778976410	544496001	0	91353539	986344	1e-06	0.494296	0.342992	0.12458	0.038131	0.837288	0.837242	0.989318	0.521815	0.589297	0.636596	0.921942
mctp_sample_249	si_5043	15355746292	15354434520	20604	7244299636	5361967734	2008592879	739553667	0	97962877	730172	1e-06	0.471805	0.349213	0.130815	0.048165	0.821018	0.820948	0.992602	0.506322	0.534664	0.582419	0.854769
mctp_sample_250	si_5059	10649920760	10649051298	11918	4859173620	4285628789	1163010237	341226734	0	71927200	373719	1e-06	0.456301	0.402442	0.109213	0.032043	0.858743	0.858673	0.994831	0.620327	0.447592	0.787175	0.524019
mctp_sample_251	si_5045	14018577194	14017659191	17170	6591593005	4908453131	1856206996	661388889	0	91354019	659141	1e-06	0.470235	0.350162	0.132419	0.047183	0.820397	0.820343	0.992836	0.547623	0.545225	0.501014	0.952117
mctp_sample_252	si_5060	15696541401	15695695899	8080	8387721315	5182027785	1560380179	565558541	0	107581171	600895	1e-06	0.534396	0.330156	0.099415	0.036033	0.864552	0.864506	0.994446	0.557965	0.581837	0.619089	0.909456
mctp_sample_253	si_5091	9546209930	9545590178	10908	4787885568	3218322662	1185673511	353697529	0	62185079	438676	1e-06	0.501581	0.337153	0.124212	0.037054	0.838734	0.838679	0.992995	0.515257	0.585069	0.587719	0.926744
mctp_sample_254	si_5062	15431925340	15430945350	30502	6764110222	6155140274	1793151580	718512774	0	96377512	883124	2e-06	0.438347	0.398883	0.116205	0.046563	0.83723	0.837177	0.99092	0.558227	0.481307	0.602612	0.787668
mctp_sample_255	si_5150	13107051891	13105935356	23028	5599741286	5165718326	1821285394	519167324	0	84291773	488666	2e-06	0.427268	0.394151	0.138966	0.039613	0.821419	0.821349	0.994236	0.545033	0.515032	0.682422	0.704976
mctp_sample_256	si_5183	14992659978	14992106243	11918	8451945634	4314757257	1732479164	492912270	0	103144516	531732	1e-06	0.56376	0.287802	0.115559	0.032878	0.851562	0.85153	0.994871	0.556561	0.610241	0.552335	1.01321
mctp_sample_257	si_5153	14262057389	14261231627	73326	6386239893	4553443862	2520247601	801226949	0	86066995	1201597	5e-06	0.447804	0.319288	0.17672	0.056182	0.767092	0.767048	0.986231	0.497848	0.613059	0.546748	0.981458
mctp_sample_258	si_5154	11218296341	11217645927	11918	5328146947	3870414598	1521857528	497214936	0	72041570	511629	1e-06	0.474979	0.345029	0.135666	0.044324	0.820008	0.819961	0.992948	0.512398	0.565001	0.569919	0.915477
mctp_sample_259	si_5184	15199100443	15198702762	11918	9094507497	3870329988	1729835509	504017850	0	104327510	714114	1e-06	0.598374	0.254649	0.113815	0.033162	0.853023	0.853	0.993202	0.600917	0.600459	0.485946	1.07991
mctp_sample_260	si_5185	13937481870	13936927459	17170	7461683057	4045884267	1860768966	568574001	0	90424821	687041	1e-06	0.535389	0.2903	0.133514	0.040796	0.825689	0.825656	0.992459	0.541701	0.674902	0.503416	1.13497
mctp_sample_261	si_5186	12204832425	12204158630	10100	6361332970	4058696874	1322653086	461465601	0	80862008	490148	1e-06	0.521243	0.332567	0.108377	0.037812	0.85381	0.853763	0.993975	0.543114	0.595582	0.49903	0.976649
mctp_sample_262	si_5187	11271498596	11270974461	9090	5436126196	4161068595	1241768441	432002139	0	74850851	435177	1e-06	0.482312	0.369184	0.110174	0.038329	0.851496	0.851457	0.99422	0.628468	0.416207	0.677724	0.592784
mctp_sample_263	si_5188	15432595172	15431969304	14544	8761347901	4607942821	1624518984	438145054	0	106391155	571050	1e-06	0.56774	0.298597	0.10527	0.028392	0.866337	0.866302	0.994661	0.538617	0.639202	0.56391	1.02818
mctp_sample_264	si_5257	12162148613	12161815149	16160	6604763545	3689990447	1384136654	482908347	0	77830927	549043	1e-06	0.543074	0.303408	0.11381	0.039707	0.846482	0.846458	0.992995	0.645456	0.464042	0.515002	0.832634
mctp_sample_265	si_5281	13574878639	13574478682	16362	7247124068	4540588882	1356432079	430317291	0	93732240	432654	1e-06	0.533879	0.334495	0.099925	0.0317	0.868373	0.868348	0.995405	0.663704	0.462829	0.580683	0.764856
mctp_sample_266	si_5258	13544535714	13543842589	16160	6591359895	4656763584	1692547986	603154964	0	86404949	616539	1e-06	0.486668	0.343829	0.124968	0.044534	0.830497	0.830455	0.992915	0.562194	0.565718	0.595071	0.876007
mctp_sample_267	si_5351	5111789073	5110837996	3030	2509869894	1882620810	519566952	198777310	0	35396543	250417	1e-06	0.491088	0.368359	0.10166	0.038893	0.859446	0.859286	0.992975	0.580931	0.357231	0.688869	0.498924
mctp_sample_268	si_5409	24002150151	24000867633	19998	13063671915	7724099119	2401982860	811093741	0	163891479	718696	1e-06	0.5443	0.321826	0.100079	0.033794	0.866126	0.86608	0.995634	0.490322	0.521398	0.571981	0.844512
mctp_sample_269	si_5410	17109048621	17107712821	18584	8572255808	6049801221	1876177484	609459725	0	116522021	638333	1e-06	0.501076	0.35363	0.109669	0.035625	0.854706	0.854639	0.994552	0.46802	0.529867	0.546066	0.809864
mctp_sample_270	si_5484	9809692569	9808838898	19796	4398646041	3606562521	1264103839	539506701	0	62003242	577051	2e-06	0.448437	0.367685	0.128874	0.055002	0.816122	0.816051	0.990779	0.498928	0.759133	0.527516	1.2085
mctp_sample_271	si_5485	9580570736	9580016254	11110	5158034651	3337560040	801516460	282893993	0	66697603	238901	1e-06	0.538416	0.348388	0.083665	0.02953	0.886804	0.886752	0.996431	0.545407	0.72234	0.522103	1.20178
mctp_sample_272	si_5552	9311468962	9310970546	26866	3895123412	2686794371	1638959629	1090066269	0	52367321	810806	3e-06	0.418337	0.288562	0.176025	0.117073	0.706899	0.706861	0.984753	0.531708	0.565096	0.588337	0.843413
mctp_sample_273	si_5553	9177250466	9176558687	13534	3826824385	3346684491	1528912504	474123773	0	56368865	527955	1e-06	0.417022	0.364699	0.166611	0.051667	0.781721	0.781662	0.990721	0.552712	0.552295	0.665931	0.769214
mctp_sample_274	si_5589	8314077499	8313639117	4848	3957472541	2776182532	1086841175	493138025	0	52325791	367649	1e-06	0.476022	0.333931	0.13073	0.059317	0.809953	0.80991	0.993023	0.628048	0.357662	0.711139	0.50793
mctp_sample_275	si_4550	9086050496	9085692366	7878	5247810716	2651687989	894452091	291733692	0	61722984	249157	1e-06	0.577591	0.291853	0.098446	0.032109	0.869444	0.86941	0.99598	0.558263	0.553988	0.685301	0.823513
mctp_sample_276	si_4868	7841513043	7841133937	10100	4116839647	2640486530	812704136	271093524	0	53611664	214676	1e-06	0.525031	0.336748	0.103646	0.034573	0.861779	0.861738	0.996012	0.581889	0.443329	0.650584	0.654396
mctp_sample_277	si_4866	9033875512	9033590178	9696	5965271515	2214626852	614140993	239541123	0	66092667	212345	1e-06	0.660343	0.245155	0.067984	0.026517	0.905498	0.905469	0.996797	0.550077	0.638304	0.579882	1.07873
mctp_sample_278	si_4867	16361080496	16360863805	8080	12292146393	2883096689	896775580	288837063	0	122410051	328071	0	0.751314	0.176219	0.054812	0.017654	0.927533	0.927521	0.997327	0.718551	0.478157	0.387599	1.17206
mctp_sample_279	si_4551	10401741843	10401357804	17776	5761779050	3021922477	1234224011	383414490	0	68997202	303980	2e-06	0.553945	0.290532	0.11866	0.036862	0.844476	0.844445	0.995614	0.62663	0.468641	0.653276	0.747807
mctp_sample_280	si_4760	8363748592	8363298419	3636	5169240781	2384916776	601239055	207898171	0	60195473	196185	0	0.618086	0.285165	0.07189	0.024858	0.903251	0.903202	0.996751	0.581053	0.579419	0.604093	0.983738
mctp_sample_281	si_4761	5203102365	5202862118	3232	3403240980	1296463878	340833883	162320146	0	36954273	172439	1e-06	0.654109	0.249183	0.065509	0.031198	0.903292	0.903251	0.995355	0.598396	0.560746	0.568552	1.04892
mctp_sample_282	si_4686	11523035763	11522587051	3636	8022839099	2778122336	528676824	192945156	0	86693608	365144	0	0.696271	0.241102	0.045882	0.016745	0.937373	0.937336	0.995806	0.758071	0.67855	0.37826	1.52896
mctp_sample_283	si_4720	8911835899	8911193934	9494	5406315387	2713029339	513063239	278776475	0	63940790	225903	1e-06	0.606688	0.304452	0.057575	0.031284	0.91114	0.911074	0.996479	0.554513	0.561496	0.627663	0.941111
mctp_sample_284	si_4762	8195122729	8194857167	5050	5638387904	1832332720	513803126	210328367	0	59584341	261381	1e-06	0.68804	0.223595	0.062698	0.025666	0.911635	0.911606	0.995632	0.672033	0.514309	0.480521	1.03451
mctp_sample_285	si_4691	9310051932	9309845567	2424	6486412386	2185416698	464553025	173461034	0	70044438	291852	0	0.696726	0.234743	0.049899	0.018632	0.931469	0.931448	0.995851	0.722212	0.639759	0.448898	1.29379
mctp_sample_286	si_4777	11330172526	11329661341	9898	7216609942	2998691421	750926470	363423610	0	79596626	426493	1e-06	0.636966	0.264676	0.06628	0.032077	0.901642	0.901602	0.99467	0.504099	0.684567	0.596352	1.09929
mctp_sample_287	si_4723	8154473663	8154179466	13534	5102005747	2382929138	452230314	217000733	0	58368918	218166	2e-06	0.625692	0.292234	0.05546	0.026612	0.917926	0.917893	0.996276	0.730684	0.391011	0.527543	0.795117
mctp_sample_288	si_4722	9662223883	9661807242	13332	5508048958	2916301507	927214773	310228672	0	67049895	297112	1e-06	0.570085	0.301838	0.095967	0.032109	0.871923	0.871885	0.995588	0.671306	0.43799	0.599075	0.741542
mctp_sample_289	si_4705	8799596518	8799269444	16968	5552681242	2457013017	527855843	261702374	0	62145819	168459	2e-06	0.631039	0.279229	0.059989	0.029741	0.910268	0.910234	0.997297	0.729428	0.429646	0.53096	0.736746
mctp_sample_290	si_4724	8774636489	8774060996	15554	4832544241	2713733370	862265476	365502356	0	59402344	332634	2e-06	0.550776	0.30929	0.098274	0.041657	0.860067	0.86001	0.994432	0.540039	0.574252	0.63975	0.899408
mctp_sample_291	si_4772	8449426286	8449127370	5050	5800770104	2020768047	441101715	186482455	0	62097043	218890	1e-06	0.686553	0.239169	0.052207	0.022071	0.925721	0.925689	0.996487	0.533056	0.703488	0.528111	1.18274
mctp_sample_292	si_4707	7782039294	7781510729	6464	4149418857	2149705483	1029433849	452946076	0	49427102	235713	1e-06	0.533241	0.276258	0.132292	0.058208	0.809499	0.809444	0.995254	0.763628	0.341245	0.536544	0.576886
mctp_sample_293	si_4706	5724581626	5724358256	3838	2567801026	1405608539	1109030833	641914020	0	31651500	247934	1e-06	0.448574	0.245549	0.193739	0.112137	0.694123	0.694096	0.992228	0.827752	0.272003	0.497031	0.485337
mctp_sample_294	si_4687	11744223238	11743796765	9696	7688865385	3156477842	640115242	258328602	0	86742512	352351	1e-06	0.654717	0.268778	0.054507	0.021997	0.923495	0.923462	0.995954	0.665915	0.74548	0.443097	1.48861
mctp_sample_295	si_4764	8163302275	8162968010	10706	5175166525	2050269484	702412788	235108507	0	56686635	198791	1e-06	0.633981	0.251167	0.086049	0.028802	0.885148	0.885112	0.996505	0.721569	0.378377	0.561831	0.706767
mctp_sample_296	si_4721	8928710171	8928135676	11110	5711815894	2643517785	377218244	195572643	0	65203195	171477	1e-06	0.639755	0.296088	0.042251	0.021905	0.935843	0.935783	0.997377	0.567037	0.548266	0.578429	0.954316
mctp_sample_297	si_4692	9654690293	9654486053	5252	6470704363	2490774568	505964352	187037518	0	71580138	331500	1e-06	0.670228	0.257991	0.052407	0.019373	0.928219	0.9282	0.99539	0.723283	0.554586	0.449298	1.0882
mctp_sample_298	si_4770	9855826440	9855132126	12928	5879197877	2861505196	836490974	277925151	0	68869900	224789	1e-06	0.596562	0.290357	0.084879	0.028201	0.886919	0.886856	0.996747	0.490662	0.654685	0.618588	1.00144
mctp_sample_299	si_4765	9732697340	9732418106	12524	6458844548	2285864032	703176400	284520602	0	69421920	278910	1e-06	0.663642	0.234871	0.072251	0.029234	0.898513	0.898488	0.995998	0.693708	0.437202	0.53213	0.842159
mctp_sample_300	si_4753	10377150060	10376574414	21816	6278302514	3133801486	689608384	274840214	0	74589145	252690	2e-06	0.605046	0.302007	0.066458	0.026487	0.907053	0.907003	0.996624	0.582933	0.568765	0.576821	0.988573
mctp_sample_301	si_4754	9732256677	9731817185	10706	5608146783	2890621537	846816837	386221322	0	66823945	272248	1e-06	0.576269	0.297028	0.087015	0.039686	0.873297	0.873258	0.995942	0.820732	0.275563	0.508342	0.511752
mctp_sample_302	si_4775	12531652669	12530838912	19392	7247336736	3406221508	1391279297	485981980	0	85198667	490577	2e-06	0.57836	0.271827	0.111028	0.038783	0.850187	0.850132	0.994275	0.479944	0.687775	0.625874	1.07683
mctp_sample_303	si_4927	16596157087	16595472944	22422	8923581487	4619848857	2338458418	713561760	0	109074738	884586	1e-06	0.537712	0.27838	0.140909	0.042997	0.816092	0.816058	0.991955	0.545005	0.60347	0.580242	0.978498
mctp_sample_304	si_4941	10007408351	10006759929	10504	5414427784	3461769389	771010033	359542219	0	65130459	338153	1e-06	0.541077	0.345943	0.077049	0.03593	0.88702	0.886963	0.994835	0.481758	0.578754	0.567534	0.891485
mctp_sample_305	si_4912	3457877410	3457730678	2222	1245127266	1449064615	541021878	222514697	0	21514894	165874	1e-06	0.3601	0.41908	0.156467	0.064353	0.779179	0.779146	0.992349	1.02922	0.082693	0.511986	0.135682
mctp_sample_306	si_4942	8368006853	8367502790	12120	4632011719	3010641272	432057633	292780046	0	61161457	302370	1e-06	0.553572	0.359802	0.051635	0.03499	0.913373	0.913318	0.995081	0.508769	0.543985	0.512024	0.920349
mctp_sample_307	si_4913	8421482717	8421070346	8484	3219770099	3168173820	1514496512	518621431	0	49665470	575180	1e-06	0.382347	0.37622	0.179846	0.061586	0.758567	0.75853	0.988552	0.821649	0.189555	0.762266	0.277892
mctp_sample_308	si_4914	9296690440	9296400465	6464	5107914695	3253824942	598952231	335702133	0	65904591	394906	1e-06	0.549451	0.350009	0.064428	0.036111	0.89946	0.899432	0.994044	0.686599	0.347012	0.584015	0.612106
mctp_sample_309	si_4915	9211980326	9211510140	9696	4538282784	3201567370	1006975520	464674770	0	60290727	510937	1e-06	0.492675	0.347562	0.109317	0.050445	0.840237	0.840194	0.991597	0.543838	0.53094	0.609307	0.81795
mctp_sample_310	si_4916	8392250691	8391924857	6868	4648290737	2807376468	622143727	314107057	0	59716649	335204	1e-06	0.5539	0.334533	0.074136	0.03743	0.888434	0.888399	0.994418	0.59527	0.464163	0.600638	0.75347
mctp_sample_311	si_4917	10562019248	10561602372	11312	5100772700	3865285549	1188266894	407265917	0	70436962	364861	1e-06	0.482954	0.365975	0.112508	0.038561	0.84893	0.848896	0.994847	0.768916	0.242961	0.5562	0.462744
mctp_sample_312	si_4918	8656887356	8656601672	3838	5051125953	2685127996	619215769	301128117	0	63524575	296441	0	0.5835	0.310183	0.071531	0.034786	0.893683	0.893653	0.995355	0.692892	0.36016	0.531259	0.686
mctp_sample_313	si_4919	9294676197	9294212552	11312	3976612955	3402086173	1352941489	562560623	0	57415861	612022	1e-06	0.427859	0.366044	0.145568	0.060528	0.793903	0.793863	0.989453	0.691102	0.360927	0.62884	0.589393
mctp_sample_314	si_4920	8460082796	8459745257	10504	4517722300	2796135051	756973953	388903449	0	59599486	338912	1e-06	0.534026	0.330522	0.08948	0.045971	0.864548	0.864514	0.994346	0.620884	0.443621	0.609605	0.728314
mctp_sample_315	si_4921	8992370370	8991911924	12322	4202148687	2920413369	1421925158	447412389	0	56299419	598994	1e-06	0.467325	0.324782	0.158134	0.049757	0.792108	0.792067	0.989473	0.617289	0.380564	0.756866	0.473822
mctp_sample_316	si_4922	8999101919	8998656528	9090	4919714742	2876943742	814875998	387112956	0	54833196	361092	1e-06	0.546717	0.319708	0.090555	0.043019	0.866425	0.866382	0.993458	0.503852	0.599853	0.647752	0.891285
mctp_sample_317	si_4923	11659489692	11658969300	17170	5336738953	4101364392	1467518842	753329943	0	73014342	494148	1e-06	0.457737	0.351778	0.12587	0.064614	0.809514	0.809478	0.993278	0.783154	0.288636	0.575792	0.501522
mctp_sample_318	si_4939	11748959128	11748053662	16362	5706193230	4184522981	1287453723	569867366	0	76994111	634521	1e-06	0.485714	0.356189	0.109589	0.048507	0.841903	0.841838	0.991826	0.471888	0.55604	0.605579	0.827114
mctp_sample_319	si_4940	9244514850	9243886949	9696	5036660515	3193416310	651746585	362053843	0	54246791	357431	1e-06	0.544864	0.345463	0.070506	0.039167	0.890326	0.890266	0.993454	0.473474	0.567738	0.618748	0.844977
mctp_sample_320	si_5189	14496245180	14495401871	25856	5948551101	4924516985	2588298424	1034009505	0	84917657	1195198	2e-06	0.410375	0.33973	0.17856	0.071334	0.750105	0.750061	0.986121	0.554025	0.596083	0.488458	1.03744
mctp_sample_321	si_5190	13971655321	13971165114	15352	6530838418	5232449635	1695099805	512761908	0	91261393	472807	1e-06	0.467451	0.374518	0.121328	0.036701	0.841969	0.841939	0.994846	0.678313	0.422428	0.500552	0.698287
mctp_sample_322	si_5191	15811654535	15811014896	90698	9173032600	4313903357	1717606248	606381993	0	106617768	706890	6e-06	0.580167	0.272842	0.108634	0.038352	0.853009	0.852974	0.993414	0.549369	0.685672	0.612142	1.043
mctp_sample_323	si_5255	15272609758	15271785884	15554	6727265965	5325516247	2320943170	898044948	0	91939256	772199	1e-06	0.440503	0.348716	0.151976	0.058804	0.789219	0.789176	0.991671	0.567377	0.522544	0.559197	0.86424
mctp_sample_324	si_5411	15054906379	15053693202	25452	7631914561	4502483952	2290350640	628918597	0	98646928	734096	2e-06	0.50698	0.299095	0.152145	0.041778	0.806075	0.80601	0.992613	0.485393	0.492414	0.629722	0.708225
mctp_sample_325	si_5487	11296289551	11295765344	20402	7921792602	2663240766	489770521	220941054	0	87724569	224342	2e-06	0.701306	0.235773	0.043359	0.01956	0.93708	0.937036	0.997449	0.478809	0.582997	0.589575	0.900123
mctp_sample_326	si_5597	9352874922	9352652180	7070	6256953849	2260207415	635864362	199619487	0	72972928	183977	1e-06	0.669003	0.241665	0.067988	0.021344	0.910668	0.910646	0.997485	0.696074	0.359459	0.617203	0.531456
mctp_sample_327	si_5596	8661717176	8661169921	14544	3523185990	3112897410	1478538220	546533760	0	51658487	443876	2e-06	0.406779	0.359408	0.170709	0.063102	0.766188	0.766139	0.991481	0.625822	0.345478	0.636622	0.504335
mctp_sample_328	si_4467	9483292990	9482711643	18180	4250326688	3557591442	1270448718	404326615	0	59847853	403914	2e-06	0.448218	0.375166	0.133975	0.042638	0.823385	0.823334	0.993296	0.720862	0.279053	0.763262	0.404591
mctp_sample_329	si_4468	7930292346	7929926321	14746	3445144173	2895822485	1230552997	358391920	0	48568062	333777	2e-06	0.434448	0.365176	0.155178	0.045195	0.799625	0.799588	0.993175	0.828955	0.221317	0.533052	0.4121
mctp_sample_330	si_4469	9726574215	9726109790	13130	4394003158	3607297528	1281344686	443451288	0	61006419	459920	1e-06	0.451774	0.370888	0.131743	0.045594	0.822662	0.822623	0.992518	0.772596	0.260906	0.630042	0.417665
mctp_sample_331	si_4470	8430343346	8429903628	9898	3465041518	3249149990	1302701802	413000420	0	51121614	383831	1e-06	0.411042	0.385431	0.154533	0.048992	0.796473	0.796432	0.992548	0.890101	0.162872	0.580661	0.288932
mctp_sample_332	si_4471	10143939545	10143501832	14746	4368451913	3503925266	1759493273	511616636	0	61162583	527339	1e-06	0.430665	0.345435	0.17346	0.050438	0.776101	0.776067	0.991452	0.800865	0.228415	0.579645	0.399753
mctp_sample_333	si_4300	8184075955	8183474519	7676	3672386357	3168607958	1019843773	322628756	0	52156784	359743	1e-06	0.448756	0.387196	0.124622	0.039424	0.835952	0.835891	0.99315	0.646637	0.306774	0.907455	0.3516
mctp_sample_334	si_4302	8345811497	8345099690	9090	3818701639	2815420841	1359489612	351478508	0	51382074	394261	1e-06	0.457598	0.337374	0.162909	0.042118	0.794972	0.794904	0.992385	0.463783	0.552935	0.667571	0.74309
mctp_sample_335	si_4304	8868283487	8867599050	19190	3906920558	3160555188	1425537314	374566802	0	55144287	430196	2e-06	0.440584	0.356416	0.160758	0.04224	0.797	0.796938	0.992259	0.528213	0.453076	0.775808	0.572662
mctp_sample_336	si_4306	8441781495	8441075063	15554	3672578110	2805733742	1599347032	363400625	0	50523395	404538	2e-06	0.435084	0.332391	0.189472	0.043051	0.767475	0.767411	0.992057	0.470658	0.526473	0.691484	0.745111
mctp_sample_337	si_4307	8864425994	8863707351	14746	4097855961	3088177672	1290429389	387229583	0	55888394	427135	2e-06	0.462319	0.348407	0.145586	0.043687	0.810726	0.81066	0.992415	0.445725	0.564487	0.79849	0.726145
mctp_sample_338	si_4310	9931382520	9930744185	14140	4624026416	3190800322	1670111722	445791587	0	61073943	547738	1e-06	0.465627	0.321305	0.168176	0.04489	0.786933	0.786882	0.991111	0.494203	0.559281	0.743134	0.735637
mctp_sample_339	si_3816	11330521784	11329809920	6868	6962802631	2937263601	1143192930	286543890	0	78622809	300252	1e-06	0.614556	0.259251	0.100901	0.025291	0.873807	0.873752	0.996196	0.513454	0.593083	0.670676	0.841262
mctp_sample_341	si_4640	7155707590	7155091888	7676	2607384175	2909876173	1231481075	406342790	0	43000748	321885	1e-06	0.36441	0.406686	0.172113	0.056791	0.771096	0.771029	0.99257	0.711011	0.224472	0.926433	0.249999
mctp_sample_342	si_4634	7707434129	7706844432	7878	3203451754	3059967569	1039408999	404008232	0	49135813	348482	1e-06	0.415663	0.397045	0.134868	0.052422	0.812709	0.812646	0.992958	0.585515	0.388718	0.698274	0.545591
mctp_sample_343	si_4642	9161785346	9161179245	9898	3953773597	3578529148	1204599914	424266688	0	58022581	385849	1e-06	0.431579	0.390619	0.13149	0.046311	0.822198	0.822144	0.993394	0.673382	0.302454	0.821352	0.356516
mctp_sample_344	si_4637	8274148058	8273614104	10504	3205059685	3376554000	1237507556	454482359	0	51121737	441327	1e-06	0.387383	0.408111	0.149573	0.054932	0.795494	0.795443	0.991441	0.702554	0.283042	0.734472	0.370186
mctp_sample_345	si_4170	9263323171	9262701328	21210	4045073951	2763161257	2036025160	418419750	0	54484098	602104	2e-06	0.436706	0.298311	0.219809	0.045173	0.735016	0.734967	0.98907	0.569329	0.515233	0.697953	0.701182
mctp_sample_347	si_4638	8100726513	8100089292	16362	3499613482	2855970703	1425869698	318619047	0	50279317	316266	2e-06	0.432046	0.352585	0.176031	0.039335	0.784631	0.78457	0.993749	0.530737	0.524702	0.664895	0.791317
mctp_sample_348	si_4635	8943308004	8942828743	11918	4135430153	3174912535	1199976094	432498043	0	57057225	323799	1e-06	0.46243	0.355023	0.134183	0.048363	0.817453	0.817409	0.994357	0.638771	0.374596	0.669655	0.561454
mctp_sample_346	si_3913	9372307420	9371489729	21168	3161169996	3119130645	2547776604	543391319	0	50775535	543040	2e-06	0.337318	0.332832	0.271865	0.057983	0.67015	0.670091	0.989418	0.600337	0.362524	0.724611	0.521776
mctp_sample_349	si_4636	8675084627	8674647416	7070	4149335506	3180160155	1049734547	295410140	0	58000311	299631	1e-06	0.478329	0.366604	0.121012	0.034054	0.844933	0.84489	0.994861	0.601817	0.438794	0.671012	0.666474
mctp_sample_350	si_4641	8567026040	8566515172	12524	3687901189	3122420712	1358085057	398095690	0	53440550	410587	1e-06	0.430502	0.364491	0.158534	0.046471	0.794993	0.794946	0.992376	0.587191	0.4517	0.675927	0.648375
mctp_sample_351	si_4645	9841351726	9840641335	12322	4052677135	3844211022	1490945095	452795765	0	61963068	438215	1e-06	0.411831	0.390646	0.151509	0.046013	0.802477	0.802419	0.992977	0.630015	0.370272	0.717804	0.498944
mctp_sample_352	si_4643	7187754082	7187403804	13130	2945053791	2744791761	1165672596	331872526	0	44638545	350879	2e-06	0.409752	0.381889	0.162183	0.046174	0.791641	0.791603	0.992201	0.727662	0.290127	0.687624	0.428882
mctp_sample_353	si_4639	9415554411	9414793379	12524	4179673876	3588106145	1257406658	389594176	0	61042712	368427	1e-06	0.443947	0.381114	0.133556	0.041381	0.825061	0.824994	0.994001	0.602169	0.382732	0.695302	0.539006
mctp_sample_354	si_4644	7230351539	7229824047	11716	3273388609	2657136442	931718640	367568642	0	45820171	295618	2e-06	0.452762	0.367524	0.128872	0.050841	0.820286	0.820226	0.99359	0.618263	0.407527	0.693497	0.5885
mctp_sample_340	si_3915	11381009696	11379871213	10976	4747960579	4008070592	2030806884	593022183	0	70082885	570114	1e-06	0.417224	0.352207	0.178456	0.052112	0.769431	0.769355	0.991931	0.582515	0.365912	0.714886	0.517894
mctp_sample_355	si_3839	10616548767	10616062372	21218	6408117945	2979214119	858025059	370684031	0	71190973	223829	2e-06	0.603625	0.280633	0.080823	0.034917	0.884257	0.884217	0.996866	0.627326	0.359198	0.592533	0.574909
mctp_sample_356	si_3840	13511927898	13511098343	13390	8094647253	3632404159	1309324030	474709513	0	89950504	360050	1e-06	0.599111	0.268846	0.096907	0.035135	0.867957	0.867904	0.996013	0.502938	0.433646	0.731336	0.618587
mctp_sample_357	si_3837	12561364279	12560724211	7828	7601510727	3427384287	1144882697	386938672	0	85888483	267826	1e-06	0.605181	0.272865	0.091148	0.030805	0.878046	0.878001	0.996891	0.531122	0.426223	0.674809	0.653447
mctp_sample_358	si_4057	14391714321	14390862474	42420	8488586176	3625562555	1762213426	514457898	0	95764592	415399	3e-06	0.589859	0.251935	0.122454	0.035749	0.841794	0.841745	0.995681	0.546969	0.567121	0.569162	0.930758
mctp_sample_359	si_4058	14280149519	14279270139	23836	8142134254	3604467623	1805961909	726682518	0	92891986	758028	2e-06	0.570207	0.252427	0.126474	0.050891	0.822633	0.822583	0.991906	0.537493	0.540081	0.632538	0.831301
mctp_sample_360	si_5532	7019080042	7018809587	3434	4551067117	1777181786	528260074	162297176	0	50250165	182710	0	0.64841	0.253203	0.075263	0.023123	0.901613	0.901578	0.996377	0.54496	0.564683	0.619949	0.889006
mctp_sample_361	si_5533	7080760944	7080372521	4646	4075250341	2168429342	633992815	202695377	0	49082857	185510	1e-06	0.57557	0.306259	0.089542	0.028628	0.881829	0.881781	0.996235	0.505878	0.538344	0.646367	0.817614
mctp_sample_362	si_5534	8574811928	8574308463	7676	4007614766	3019964026	1160192065	386529930	0	54169244	365555	1e-06	0.467398	0.352211	0.13531	0.04508	0.819609	0.819561	0.993297	0.588605	0.378106	0.674237	0.557745
mctp_sample_363	si_5535	7993834173	7993455586	6464	4013059334	3210345918	508060240	261983630	0	56161174	263629	1e-06	0.502043	0.401622	0.06356	0.032775	0.903665	0.903622	0.995328	0.676625	0.229037	0.759337	0.289799
mctp_sample_364	si_5536	7344226716	7343803631	11716	3882417814	2628498255	547602980	285272870	0	50671964	249096	2e-06	0.528666	0.357921	0.074567	0.038845	0.886586	0.886535	0.995108	0.5354	0.477403	0.675418	0.674177
mctp_sample_365	si_5537	8090971731	8090451786	12524	4183007846	2947828229	617859201	341743986	0	55674366	303736	2e-06	0.51703	0.364359	0.076369	0.04224	0.881389	0.881332	0.994574	0.502752	0.494917	0.601293	0.725297
mctp_sample_366	si_5538	8433600899	8433178792	14140	4466634672	2792423218	796066093	378040670	0	56494194	349507	2e-06	0.52965	0.331123	0.094397	0.044828	0.860774	0.860731	0.993851	0.518866	0.503602	0.670828	0.691869
mctp_sample_367	si_5539	7807265357	7806785554	10706	3919680778	2654417222	843577528	389099320	0	51763607	383724	1e-06	0.502086	0.340014	0.108057	0.049841	0.8421	0.842049	0.992642	0.500506	0.511687	0.618825	0.74688
mctp_sample_368	si_3838	13089279964	13088461429	9476	7722622087	3738363267	1234961089	392505510	0	88913828	346625	1e-06	0.590033	0.285623	0.094355	0.029989	0.875656	0.875601	0.996117	0.527689	0.419774	0.693593	0.597512
mctp_sample_369	si_4445	8546358511	8545988789	17170	4728217315	2378866967	1146720913	292166424	0	55062419	388224	2e-06	0.553267	0.278361	0.134182	0.034188	0.831628	0.831592	0.992999	0.595617	0.441528	0.611319	0.719667
mctp_sample_370	si_3841	13121104801	13120260123	9270	7510933401	3530350452	1540710213	538256791	0	85686276	439055	1e-06	0.572468	0.269076	0.11743	0.041025	0.841545	0.84149	0.994902	0.517058	0.432853	0.713395	0.614588
mctp_sample_371	si_3842	13500666970	13500016805	14342	7347216703	4091650203	1514603774	546531783	0	88683016	520405	1e-06	0.544238	0.303085	0.112193	0.040484	0.847322	0.847282	0.994166	0.668866	0.344912	0.658313	0.518171
mctp_sample_372	si_5000	16616685236	16615681744	23432	8169223174	5455956096	2278783304	711695741	0	107177698	777049	1e-06	0.491657	0.328362	0.137147	0.042833	0.820019	0.81997	0.992802	0.50922	0.596424	0.585469	0.996519
mctp_sample_373	si_5025	9026644215	9026118974	11514	4698846511	3282846268	668530124	375884562	0	61307484	405304	1e-06	0.520583	0.363705	0.074066	0.041644	0.884288	0.884237	0.993432	0.516344	0.556742	0.541986	0.906894

## Sheet: DataS4_Summarized_Transcriptome
# Supplementary DataS4 : Summarized Transcriptome
# See Methods for detailed procedure used for summarizing the transcriptome
Ensembl Gene ID	Gene_Name	Exon_ID	Gene_Biotype	Chrom	Start	End	Strand
ENSG00000110514	MADD	NA	protein_coding	11	47290710	47351582	+
ENSG00000086015	MAST2	NA	protein_coding	1	46269283	46501796	+
ENSG00000211769	TRBJ2-5	NA	TR_J_gene	7	142494801	142494850	+
ENSG00000211768	TRBJ2-4	NA	TR_J_gene	7	142494680	142494731	+
ENSG00000204228	HSD17B8	NA	protein_coding	6	33172417	33174608	+
ENSG00000211767	TRBJ2-3	NA	TR_J_gene	7	142494529	142494579	+
ENSG00000211766	TRBJ2-2P	NA	TR_J_gene	7	142494379	142494426	+
ENSG00000211765	TRBJ2-2	NA	TR_J_gene	7	142494242	142494294	+
ENSG00000211764	TRBJ2-1	NA	TR_J_gene	7	142494047	142494098	+
ENSG00000215869	RP11-364B6.1	NA	processed_transcript	1	104615643	104619709	+
ENSG00000261609	MIR4720	NA	lincRNA	16	81416872	81424489	+
ENSG00000251076	RP11-526F3.1	NA	antisense	5	111563978	111593006	+
ENSG00000261604	CTD-2636A23.2	NA	antisense	5	43287701	43290941	+
ENSG00000261602	CTD-2033A16.1	NA	antisense	16	69743775	69744486	+
ENSG00000261600	RP11-575H3.1	NA	lincRNA	2	91768391	91768920	+
ENSG00000266468	AL031284.1	NA	miRNA	1	25732720	25732780	+
ENSG00000266469	CTB-131K11.1	NA	antisense	17	37558044	37562486	+
ENSG00000168298	HIST1H1E	NA	protein_coding	6	26156557	26157343	+
ENSG00000266462	AC010327.1	NA	miRNA	19	55745493	55745564	+
ENSG00000266463	MIR3196	NA	miRNA	20	61870129	61870194	+
ENSG00000266461	MIR2392	NA	miRNA	14	101280826	101280911	+
ENSG00000266466	RP11-822E23.2	NA	antisense	17	21436233	21446049	+
ENSG00000262558	RP11-1260E13.3	NA	antisense	17	204526	206673	+
ENSG00000225105	RP11-165I9.6	NA	processed_transcript	13	25767243	25784433	+
ENSG00000226455	RP3-512E2.2	NA	antisense	6	90659833	90662905	+
ENSG00000221487	AC069294.1	NA	miRNA	7	99310658	99310775	+
ENSG00000226458	RP11-417O11.6	NA	sense_intronic	10	75788169	75789962	+
ENSG00000203871	C6orf164	NA	protein_coding	6	88106838	88109467	+
ENSG00000187961	KLHL17	NA	protein_coding	1	895965	901095	+
ENSG00000187969	ZCCHC13	NA	protein_coding	X	73524023	73524868	+
ENSG00000162843	WDR64	NA	protein_coding	1	241815578	241965435	+
ENSG00000162849	KIF26B	NA	protein_coding	1	245318285	245872733	+
ENSG00000221156	AC007551.1	NA	miRNA	7	35882497	35882583	+
ENSG00000163462	TRIM46	NA	protein_coding	1	155145871	155157447	+
ENSG00000163466	ARPC2	NA	protein_coding	2	219081815	219119079	+
ENSG00000163467	TSACC	NA	protein_coding	1	156307103	156316786	+
ENSG00000162599	NFIA	NA	protein_coding	1	61330929	61928465	+
ENSG00000267731	RP11-147L13.8	NA	lincRNA	17	66186023	66188943	+
ENSG00000267732	RP11-456O19.3	NA	lincRNA	18	53805841	53810452	+
ENSG00000267735	CTD-2265O21.7	NA	antisense	19	12991781	12994902	+
ENSG00000162594	IL23R	NA	protein_coding	1	67632081	67725662	+
ENSG00000263608	Metazoa_SRP	NA	misc_RNA	6	30718813	30719062	+
ENSG00000118640	VAMP8	NA	protein_coding	2	85788683	85809154	+
ENSG00000263603	CTD-2349P21.5	NA	lincRNA	17	29056485	29058220	+
ENSG00000168488	ATXN2L	NA	protein_coding	16	28834367	28848558	+
ENSG00000159961	OR3A3	NA	protein_coding	17	3323860	3324827	+
ENSG00000201466	Y_RNA	NA	misc_RNA	18	12760714	12760817	+
ENSG00000253141	CTB-164N12.1	NA	lincRNA	5	172890501	172911587	+
ENSG00000259163	RP11-1078H9.5	NA	processed_transcript	14	91108980	91115238	+
ENSG00000253148	RGS21	NA	protein_coding	1	192286120	192336415	+
ENSG00000259166	RP11-1029J19.2	NA	lincRNA	14	101913977	101923454	+
ENSG00000213859	KCTD11	NA	protein_coding	17	7255206	7258258	+
ENSG00000225815	AC092669.6	NA	lincRNA	2	66554479	66556116	+
ENSG00000225811	RP11-547I7.1	NA	antisense	1	190234026	190331400	+
ENSG00000225818	AC118653.2	NA	lincRNA	17	69592477	69593420	+
ENSG00000229307	LINC00459	NA	processed_transcript	13	62897788	62902966	+
ENSG00000229304	RP11-198M6.5	NA	sense_intronic	10	121672905	121673914	+
ENSG00000229301	RP5-905H7.8	NA	lincRNA	7	62814833	62819684	+
ENSG00000238486	snoU13	NA	snoRNA	19	52172656	52172761	+
ENSG00000238484	snoU13	NA	snoRNA	6	34660555	34660660	+
ENSG00000238481	snoU13	NA	snoRNA	2	157278705	157278811	+
ENSG00000229309	RP11-452B18.2	NA	lincRNA	13	81857306	81876542	+
ENSG00000055070	SZRD1	NA	protein_coding	1	16693576	16724640	+
ENSG00000264660	RP11-381P6.1	NA	antisense	17	20841849	20885670	+
ENSG00000227410	RP11-265B8.4	NA	processed_transcript	9	71736207	71737148	+
ENSG00000155719	OTOA	NA	protein_coding	16	21689833	21772050	+
ENSG00000227415	RP1-91G5.3	NA	processed_transcript	1	152346428	152417932	+
ENSG00000227418	PCGEM1	NA	processed_transcript	2	193614569	193641625	+
ENSG00000251778	SNORA3	NA	snoRNA	21	43302312	43302409	+
ENSG00000251779	Y_RNA	NA	misc_RNA	17	74315455	74315554	+
ENSG00000251774	U6	NA	snRNA	3	12556203	12556306	+
ENSG00000251770	RNA5SP486	NA	rRNA	20	46501933	46502017	+
ENSG00000251772	AL117380.2	NA	miRNA	20	55575141	55575213	+
ENSG00000251773	U6	NA	snRNA	3	86284469	86284574	+
ENSG00000242741	RP11-20B7.1	NA	lincRNA	3	73857750	73952017	+
ENSG00000164654	MIOS	NA	protein_coding	7	7606501	7647127	+
ENSG00000252235	U6	NA	snRNA	4	13052964	13053035	+
ENSG00000252231	RNA5SP67	NA	rRNA	1	173890206	173890338	+
ENSG00000206113	RP11-503N18.1	NA	antisense	4	2420699	2430972	+
ENSG00000161021	MAML1	NA	protein_coding	5	179159849	179204287	+
ENSG00000256923	RP11-449P1.1	NA	lincRNA	12	22895514	22896025	+
ENSG00000256929	AC067852.1	NA	pseudogene	17	40673734	40674065	+
ENSG00000254695	RP11-396O20.1	NA	lincRNA	11	15665429	15726914	+
ENSG00000254691	RP11-91P24.5	NA	antisense	11	77561648	77562557	+
ENSG00000266929	RP11-400F19.8	NA	processed_transcript	17	40688526	40714080	+
ENSG00000266927	AC006273.7	NA	lincRNA	19	786363	786965	+
ENSG00000266924	RP11-154H12.2	NA	lincRNA	18	77547119	77551432	+
ENSG00000266923	RP11-693J15.4	NA	antisense	12	92815305	92877456	+
ENSG00000257346	RP11-386G11.8	NA	antisense	12	49483989	49487095	+
ENSG00000257345	RP11-511B23.1	NA	lincRNA	12	93396901	93413596	+
ENSG00000256699	RP11-669N7.3	NA	lincRNA	12	129693144	129697207	+
ENSG00000256690	RP11-727F15.9	NA	antisense	11	62599704	62601515	+
ENSG00000165309	ARMC3	NA	protein_coding	10	23216951	23326518	+
ENSG00000165304	MELK	NA	protein_coding	9	36572857	36677678	+
ENSG00000165300	SLITRK5	NA	protein_coding	13	88324868	88331868	+
ENSG00000101608	MYL12A	NA	protein_coding	18	3247477	3256234	+
ENSG00000170100	ZNF778	NA	protein_coding	16	89284116	89295363	+
ENSG00000198794	SCAMP5	NA	protein_coding	15	75287871	75313837	+
ENSG00000231429	AL358175.2	NA	lincRNA	1	121166921	121171134	+
ENSG00000198798	MAGEB3	NA	protein_coding	X	30248551	30255607	+
ENSG00000231427	RP11-436F9.1	NA	lincRNA	7	54398388	54417542	+
ENSG00000197774	EME2	NA	protein_coding	16	1823206	1826312	+
ENSG00000231422	RP11-80K21.3	NA	lincRNA	10	25401985	25406286	+
ENSG00000175556	LONRF3	NA	protein_coding	X	118108579	118156888	+
ENSG00000183862	CNGA2	NA	protein_coding	X	150906921	150913776	+
ENSG00000124216	SNAI1	NA	protein_coding	20	48599534	48605423	+
ENSG00000124217	MOCS3	NA	protein_coding	20	49575361	49577820	+
ENSG00000124215	CDH26	NA	protein_coding	20	58533469	58609066	+
ENSG00000167685	ZNF444	NA	protein_coding	19	56643966	56672262	+
ENSG00000255279	RP11-375D13.4	NA	lincRNA	11	41877468	41897547	+
ENSG00000255270	NAV2-IT1	NA	sense_intronic	11	19402029	19406561	+
ENSG00000255272	RP11-646J21.6	NA	antisense	11	33797732	33801041	+
ENSG00000036054	TBC1D23	NA	protein_coding	3	99979842	100044095	+
ENSG00000002586	CD99	NA	protein_coding	X	2609218	2659350	+
ENSG00000177954	RPS27	NA	protein_coding	1	153963233	153964626	+
ENSG00000198242	RPL23A	NA	protein_coding	17	27046409	27051377	+
ENSG00000198246	SLC29A3	NA	protein_coding	10	73079013	73123142	+
ENSG00000135916	ITM2C	NA	protein_coding	2	231729352	231743963	+
ENSG00000135912	TTLL4	NA	protein_coding	2	219575566	219620139	+
ENSG00000175077	RTP1	NA	protein_coding	3	186915272	186919253	+
ENSG00000034693	PEX3	NA	protein_coding	6	143771942	143811147	+
ENSG00000176393	RNPEP	NA	protein_coding	1	201951750	201975275	+
ENSG00000176399	DMRTA1	NA	protein_coding	9	22446838	22452472	+
ENSG00000230489	VAV3-AS1	NA	antisense	1	108507063	108537229	+
ENSG00000243900	Metazoa_SRP	NA	misc_RNA	13	52043884	52044181	+
ENSG00000248029	CTD-2313F11.3	NA	lincRNA	5	54359005	54362058	+
ENSG00000252598	RNA5SP460	NA	rRNA	18	70419185	70419286	+
ENSG00000252591	RNA5SP468	NA	rRNA	19	18082832	18082926	+
ENSG00000252590	U7	NA	snRNA	7	23490275	23490341	+
ENSG00000247626	MARS2	NA	protein_coding	2	198570085	198573113	+
ENSG00000252594	U6	NA	snRNA	8	47742670	47742778	+
ENSG00000167535	CACNB3	NA	protein_coding	12	49208232	49222724	+
ENSG00000241500	Metazoa_SRP	NA	misc_RNA	15	82969417	82969698	+
ENSG00000149792	MRPL49	NA	protein_coding	11	64889781	64894843	+
ENSG00000237289	CKMT1B	NA	protein_coding	15	43885250	43891604	+
ENSG00000237286	AC004906.3	NA	antisense	7	2983667	2986725	+
ENSG00000237280	RP11-96C23.9	NA	sense_intronic	10	88873709	88875280	+
ENSG00000237282	DZANK1-AS1	NA	antisense	20	18359691	18362128	+
ENSG00000197734	C14orf178	NA	protein_coding	14	78227171	78236085	+
ENSG00000206941	SNORD15A	NA	snoRNA	11	75111433	75111582	+
ENSG00000206948	SNORA36A	NA	snoRNA	X	153996801	153996934	+
ENSG00000198366	HIST1H3A	NA	protein_coding	6	26020716	26021186	+
ENSG00000200478	SNORD115-41	NA	snoRNA	15	25490623	25490706	+
ENSG00000200475	7SK	NA	misc_RNA	12	13836474	13836820	+
ENSG00000200471	U6	NA	snRNA	7	54688716	54688824	+
ENSG00000200473	RNA5SP507	NA	rRNA	X	69472890	69473012	+
ENSG00000200472	7SK	NA	misc_RNA	18	29298854	29299171	+
ENSG00000149798	CDC42EP2	NA	protein_coding	11	65082287	65089900	+
ENSG00000169992	NLGN2	NA	protein_coding	17	7308191	7323179	+
ENSG00000221486	AC000003.1	NA	miRNA	17	9974205	9974321	+
ENSG00000237136	C4orf51	NA	protein_coding	4	146601354	146653949	+
ENSG00000237612	AP002856.7	NA	lincRNA	11	131104431	131121711	+
ENSG00000154252	GAL3ST2	NA	protein_coding	2	242716238	242743623	+
ENSG00000223760	CCDC74B-AS1	NA	processed_transcript	2	130887192	130896990	+
ENSG00000223765	RP1-288M22.2	NA	lincRNA	6	72160535	72168577	+
ENSG00000223768	LINC00205	NA	lincRNA	21	46713198	46717269	+
ENSG00000177707	PVRL3	NA	protein_coding	3	110788916	110994410	+
ENSG00000236427	RP11-107M16.2	NA	antisense	1	152178332	152179533	+
ENSG00000236424	TSPY10	NA	protein_coding	Y	9365487	9368285	+
ENSG00000136750	GAD2	NA	protein_coding	10	26505234	26593487	+
ENSG00000232500	AP005273.1	NA	lincRNA	11	64268323	64272858	+
ENSG00000249087	C1orf213	NA	protein_coding	1	23695709	23698332	+
ENSG00000116014	KISS1R	NA	protein_coding	19	917285	921015	+
ENSG00000116016	EPAS1	NA	protein_coding	2	46523745	46613836	+
ENSG00000201709	U6	NA	snRNA	15	65522197	65522305	+
ENSG00000120440	TTLL2	NA	protein_coding	6	167738572	167755375	+
ENSG00000201700	SNORD113-3	NA	snoRNA	14	101396254	101396328	+
ENSG00000201701	SNORA25	NA	snoRNA	3	32079016	32079145	+
ENSG00000203314	AC015815.1	NA	pseudogene	17	75099517	75099654	+
ENSG00000147689	FAM83A	NA	protein_coding	8	124191285	124222314	+
ENSG00000187244	BCAM	NA	protein_coding	19	45312336	45324671	+
ENSG00000231004	CECR9	NA	processed_transcript	22	17809922	17810122	+
ENSG00000186119	OR5D18	NA	protein_coding	11	55587084	55588073	+
ENSG00000186118	ATPAF1-AS1	NA	protein_coding	1	47134525	47139266	+
ENSG00000224231	AC069394.1	NA	lincRNA	2	138859452	138863475	+
ENSG00000264658	MIR4798	NA	miRNA	4	7312175	7312251	+
ENSG00000235192	AC009495.2	NA	lincRNA	2	166651359	166666520	+
ENSG00000264652	MIR4649	NA	miRNA	7	44150446	44150511	+
ENSG00000188343	FAM92A1	NA	protein_coding	8	94710787	94743755	+
ENSG00000044012	GUCA2B	NA	protein_coding	1	42619090	42621495	+
ENSG00000122254	HS3ST2	NA	protein_coding	16	22825496	22927659	+
ENSG00000130758	MAP3K10	NA	protein_coding	19	40697649	40721481	+
ENSG00000231852	CYP21A2	NA	protein_coding	6	32006040	32009447	+
ENSG00000231850	GAGE2B	NA	protein_coding	X	49235706	49242997	+
ENSG00000130751	NPAS1	NA	protein_coding	19	47524141	47549016	+
ENSG00000180818	HOXC10	NA	protein_coding	12	54378847	54384063	+
ENSG00000248842	CTB-1H10.1	NA	lincRNA	5	145780542	145786922	+
ENSG00000230810	RP11-315I14.3	NA	antisense	9	23693626	23721789	+
ENSG00000230812	RP4-794H19.4	NA	lincRNA	1	59486057	59510286	+
ENSG00000230815	RP11-49O14.3	NA	sense_intronic	9	97586552	97587055	+
ENSG00000166225	FRS2	NA	protein_coding	12	69864127	69973562	+
ENSG00000100883	SRP54	NA	protein_coding	14	35451161	35498773	+
ENSG00000069712	KIAA1107	NA	protein_coding	1	92632540	92650280	+
ENSG00000134186	PRPF38B	NA	protein_coding	1	109234943	109244425	+
ENSG00000134184	GSTM1	NA	protein_coding	1	110230434	110251307	+
ENSG00000262714	RP11-44F14.8	NA	lincRNA	16	53420854	53422997	+
ENSG00000259833	RP11-23E19.1	NA	antisense	16	71114767	71127570	+
ENSG00000248210	RP11-24I21.1	NA	lincRNA	4	150075445	150199275	+
ENSG00000145192	AHSG	NA	protein_coding	3	186330710	186339107	+
ENSG00000037042	TUBG2	NA	protein_coding	17	40811321	40819024	+
ENSG00000260621	RP11-413H22.2	NA	antisense	16	56443230	56445595	+
ENSG00000260625	RP11-452L6.7	NA	antisense	16	31519790	31520569	+
ENSG00000145194	ECE2	NA	protein_coding	3	183967436	184010819	+
ENSG00000105855	ITGB8	NA	protein_coding	7	20370323	20450419	+
ENSG00000111481	COPZ1	NA	protein_coding	12	54694984	54745633	+
ENSG00000105856	HBP1	NA	protein_coding	7	106809404	106842974	+
ENSG00000105851	PIK3CG	NA	protein_coding	7	106505721	106547590	+
ENSG00000079689	SCGN	NA	protein_coding	6	25652462	25702011	+
ENSG00000265292	Metazoa_SRP	NA	misc_RNA	11	93533647	93533916	+
ENSG00000142252	GEMIN7	NA	protein_coding	19	45582451	45594782	+
ENSG00000183549	ACSM5	NA	protein_coding	16	20420854	20452658	+
ENSG00000012171	SEMA3B	NA	processed_transcript	3	50304988	50314977	+
ENSG00000135587	SMPD2	NA	protein_coding	6	109761964	109765122	+
ENSG00000131009	TTTY9A	NA	processed_transcript	Y	20891766	20901083	+
ENSG00000233431	RP11-63N8.3	NA	antisense	1	21912963	21917680	+
ENSG00000221311	MIR1302-11	NA	miRNA	1	30364	30503	+
ENSG00000221310	AC008967.1	NA	miRNA	5	110891591	110891678	+
ENSG00000221312	AL109922.1	NA	miRNA	6	65684284	65684385	+
ENSG00000221315	MIR1204	NA	miRNA	8	128808206	128808274	+
ENSG00000221316	AL445204.1	NA	miRNA	13	107773379	107773471	+
ENSG00000221319	AL441988.1	NA	miRNA	20	29637160	29637300	+
ENSG00000196098	OR5K4	NA	protein_coding	3	98072696	98073663	+
ENSG00000071082	RPL31	NA	protein_coding	2	101618175	101640494	+
ENSG00000135638	EMX1	NA	protein_coding	2	73143174	73162020	+
ENSG00000135632	SMYD5	NA	protein_coding	2	73441348	73454365	+
ENSG00000135636	DYSF	NA	protein_coding	2	71680850	71913898	+
ENSG00000147155	EBP	NA	protein_coding	X	48379544	48387104	+
ENSG00000263445	MIR4450	NA	miRNA	4	77494719	77494785	+
ENSG00000263441	AC012181.1	NA	miRNA	16	56991175	56991273	+
ENSG00000184992	BRI3BP	NA	protein_coding	12	125478244	125515684	+
ENSG00000259764	RP11-299G20.3	NA	antisense	15	101874640	101877633	+
ENSG00000259763	RP11-327J17.1	NA	non_coding	15	96779012	96779932	+
ENSG00000259761	RP11-138H10.2	NA	lincRNA	15	87585283	87590392	+
ENSG00000259768	RP5-991G20.1	NA	processed_transcript	16	72699067	72821143	+
ENSG00000261978	CTD-2529O21.2	NA	antisense	17	77997691	77999906	+
ENSG00000112530	PACRG	NA	protein_coding	6	163148162	163736524	+
ENSG00000112531	QKI	NA	protein_coding	6	163835673	163999628	+
ENSG00000162592	CCDC27	NA	protein_coding	1	3668960	3688208	+
ENSG00000029364	SLC39A9	NA	protein_coding	14	69865405	69929105	+
ENSG00000227258	SMIM2-AS1	NA	antisense	13	44716680	44813010	+
ENSG00000227256	MIS18A-AS1	NA	antisense	21	33650172	33653299	+
ENSG00000204361	NXPE2	NA	protein_coding	11	114549106	114579362	+
ENSG00000227253	RP11-166N17.1	NA	antisense	10	32555215	32558039	+
ENSG00000105141	CASP14	NA	protein_coding	19	15160289	15166900	+
ENSG00000105146	AURKC	NA	protein_coding	19	57742375	57746915	+
ENSG00000267632	RP11-400F19.18	NA	sense_intronic	17	40661800	40663537	+
ENSG00000142920	ADC	NA	protein_coding	1	33546712	33586130	+
ENSG00000267636	AC008992.1	NA	lincRNA	19	31912901	31918208	+
ENSG00000267637	RP11-619I22.1	NA	sense_intronic	17	57862172	57862396	+
ENSG00000235943	TMEM212-IT1	NA	sense_intronic	3	171612224	171613030	+
ENSG00000235942	LCE6A	NA	protein_coding	1	152815342	152816459	+
ENSG00000146205	ANO7	NA	protein_coding	2	242127922	242164791	+
ENSG00000164418	GRIK2	NA	protein_coding	6	101846662	102517958	+
ENSG00000242509	Metazoa_SRP	NA	misc_RNA	20	35498500	35498793	+
ENSG00000242502	Metazoa_SRP	NA	misc_RNA	15	23608426	23608706	+
ENSG00000164414	SLC35A1	NA	protein_coding	6	88182641	88222054	+
ENSG00000100532	CGRRF1	NA	protein_coding	14	54976544	55005567	+
ENSG00000139292	LGR5	NA	protein_coding	12	71833548	71980090	+
ENSG00000253147	RP11-369E15.4	NA	lincRNA	8	20810636	20826415	+
ENSG00000212659	KRTAP9-6	NA	protein_coding	17	39421589	39422893	+
ENSG00000265908	RP11-20B24.6	NA	antisense	17	27271812	27272412	+
ENSG00000265907	RP11-737O24.2	NA	antisense	18	2948234	2960754	+
ENSG00000265900	Metazoa_SRP	NA	misc_RNA	19	2020327	2020580	+
ENSG00000260366	CTD-2639E6.4	NA	sense_overlapping	19	49429426	49429701	+
ENSG00000260364	RP11-256I9.3	NA	lincRNA	16	65266957	65466723	+
ENSG00000021300	PLEKHB1	NA	protein_coding	11	73357221	73373864	+
ENSG00000100393	EP300	NA	protein_coding	22	41487788	41576081	+
ENSG00000100395	L3MBTL2	NA	protein_coding	22	41601207	41627275	+
ENSG00000223201	AC004699.1	NA	miRNA	19	15163739	15163885	+
ENSG00000223200	AC008836.1	NA	miRNA	5	60853108	60853194	+
ENSG00000223203	RNA5SP221	NA	rRNA	6	143770944	143771048	+
ENSG00000223202	7SK	NA	misc_RNA	11	74396267	74396550	+
ENSG00000264380	AL590113.1	NA	miRNA	1	85750291	85750356	+
ENSG00000200553	Y_RNA	NA	misc_RNA	4	120868284	120868387	+
ENSG00000222357	U2	NA	snRNA	3	168192984	168193176	+
ENSG00000196550	FAM72A	NA	protein_coding	1	206137263	206155151	+
ENSG00000196557	CACNA1H	NA	protein_coding	16	1203239	1271771	+
ENSG00000264387	MIR5007	NA	miRNA	13	55748587	55748683	+
ENSG00000197208	SLC22A4	NA	protein_coding	5	131630134	131679899	+
ENSG00000239468	Metazoa_SRP	NA	misc_RNA	7	148587304	148587607	+
ENSG00000239462	CTD-2021J15.1	NA	antisense	3	98621266	98737406	+
ENSG00000151292	CSNK1G3	NA	protein_coding	5	122847791	122952739	+
ENSG00000239467	AC007405.6	NA	lincRNA	2	171627621	171634658	+
ENSG00000205959	RP11-689P11.2	NA	processed_transcript	4	8483995	8514337	+
ENSG00000211680	IGLJ4	NA	IG_J_gene	22	23252742	23252776	+
ENSG00000211681	IGLJ5	NA	IG_J_gene	22	23256406	23256479	+
ENSG00000211682	IGLJ6	NA	IG_J_gene	22	23260302	23260373	+
ENSG00000211684	IGLJ7	NA	IG_J_gene	22	23263560	23263607	+
ENSG00000211685	IGLC7	NA	IG_C_gene	22	23264764	23265085	+
ENSG00000185155	MIXL1	NA	protein_coding	1	226411317	226414785	+
ENSG00000229565	AC108056.1	NA	lincRNA	4	118755554	118791103	+
ENSG00000182545	RNASE10	NA	protein_coding	14	20973694	20979328	+
ENSG00000261101	RP4-545K15.5	NA	sense_overlapping	X	100882856	100883508	+
ENSG00000106636	YKT6	NA	protein_coding	7	44240565	44253893	+
ENSG00000261104	RP11-734K21.5	NA	lincRNA	2	9246720	9249994	+
ENSG00000216081	AC010146.2	NA	miRNA	2	137301939	137302050	+
ENSG00000211538	MIR501	NA	miRNA	X	49774328	49774413	+
ENSG00000211532	MIR526A2	NA	miRNA	19	54230174	54230240	+
ENSG00000211530	AL354933.1	NA	miRNA	6	72294790	72294904	+
ENSG00000211534	AL121588.1	NA	miRNA	20	37900181	37900258	+
ENSG00000152670	DDX4	NA	protein_coding	5	55033843	55112985	+
ENSG00000238731	U7	NA	snRNA	16	72707400	72707463	+
ENSG00000238733	snoU13	NA	snoRNA	7	128701583	128701688	+
ENSG00000238737	AC100756.1	NA	miRNA	15	23609589	23609673	+
ENSG00000238736	snoU13	NA	snoRNA	2	219193301	219193403	+
ENSG00000124588	NQO2	NA	protein_coding	6	2988219	3019996	+
ENSG00000143641	GALNT2	NA	protein_coding	1	230193534	230417870	+
ENSG00000220161	RP1-37N7.3	NA	lincRNA	17	18314471	18317694	+
ENSG00000258056	RP11-644F5.11	NA	antisense	12	56122886	56124467	+
ENSG00000178921	PFAS	NA	protein_coding	17	8150934	8173809	+
ENSG00000266349	AC018618.1	NA	miRNA	15	62036138	62036218	+
ENSG00000266347	AC068641.1	NA	miRNA	12	89986602	89986704	+
ENSG00000266346	AC019205.2	NA	miRNA	6	74142705	74142807	+
ENSG00000266344	AL353731.1	NA	miRNA	10	75188423	75188494	+
ENSG00000266343	Metazoa_SRP	NA	misc_RNA	14	91614370	91614663	+
ENSG00000252861	U6	NA	snRNA	5	83492699	83492807	+
ENSG00000252860	U6	NA	snRNA	1	200023187	200023293	+
ENSG00000252865	U6	NA	snRNA	12	57904845	57904918	+
ENSG00000229308	AC010084.1	NA	lincRNA	Y	3904536	3968361	+
ENSG00000252867	U6	NA	snRNA	5	28624762	28624870	+
ENSG00000252866	RNA5SP243	NA	rRNA	7	128337762	128337798	+
ENSG00000252869	AL159140.1	NA	miRNA	14	59866739	59866869	+
ENSG00000252868	snoZ278	NA	snoRNA	15	29526070	29526183	+
ENSG00000212134	SNORA40	NA	snoRNA	20	29964120	29964249	+
ENSG00000241074	Metazoa_SRP	NA	misc_RNA	2	169307832	169308136	+
ENSG00000200670	U6	NA	snRNA	7	65279657	65279762	+
ENSG00000040487	PQLC2	NA	protein_coding	1	19638818	19655794	+
ENSG00000200674	7SK	NA	misc_RNA	1	173760684	173761025	+
ENSG00000204709	C6orf100	NA	protein_coding	6	28911652	28912314	+
ENSG00000204702	OR2J1	NA	protein_coding	6	29068384	29069658	+
ENSG00000204701	OR2J3	NA	protein_coding	6	29079666	29080603	+
ENSG00000204700	OR2J2	NA	protein_coding	6	29141309	29142351	+
ENSG00000228778	RP11-129J12.1	NA	lincRNA	10	101286836	101288018	+
ENSG00000228779	Z69666.2	NA	antisense	16	175734	177218	+
ENSG00000226644	RP11-128M1.1	NA	lincRNA	20	2187861	2193797	+
ENSG00000226645	AP006216.10	NA	antisense	11	116644103	116644921	+
ENSG00000226640	RP11-21J7.1	NA	lincRNA	1	193648022	193696313	+
ENSG00000164047	CAMP	NA	protein_coding	3	48264835	48266981	+
ENSG00000143756	FBXO28	NA	protein_coding	1	224301787	224349749	+
ENSG00000226649	AC019118.4	NA	lincRNA	2	3160525	3161568	+
ENSG00000183242	WT1-AS	NA	antisense	11	32457062	32480315	+
ENSG00000127774	EMC6	NA	protein_coding	17	3572107	3572962	+
ENSG00000239923	Metazoa_SRP	NA	misc_RNA	20	14203685	14203976	+
ENSG00000239922	RP11-71N10.1	NA	lincRNA	3	147657789	147724542	+
ENSG00000233927	RPS28	NA	protein_coding	19	8386382	8387809	+
ENSG00000233928	RP11-305F18.1	NA	lincRNA	X	33744623	33960397	+
ENSG00000162337	LRP5	NA	protein_coding	11	68080075	68216743	+
ENSG00000245317	CTC-241N9.1	NA	protein_coding	5	179286011	179288283	+
ENSG00000165409	TSHR	NA	protein_coding	14	81421385	81612646	+
ENSG00000241258	CRCP	NA	protein_coding	7	65579590	65619551	+
ENSG00000257997	RP11-100F15.2	NA	lincRNA	12	114518184	114551294	+
ENSG00000206635	U6	NA	snRNA	1	151601798	151601906	+
ENSG00000206634	SNORA22	NA	snoRNA	7	65220511	65220646	+
ENSG00000206637	SNORA70	NA	snoRNA	1	201947587	201947723	+
ENSG00000206636	Y_RNA	NA	misc_RNA	12	8128853	8128956	+
ENSG00000255843	AP000593.7	NA	antisense	11	72013181	72014009	+
ENSG00000206639	Y_RNA	NA	misc_RNA	X	21890823	21890926	+
ENSG00000207944	MIR574	NA	miRNA	4	38869651	38869748	+
ENSG00000207946	MIR516B1	NA	miRNA	19	54240097	54240188	+
ENSG00000207940	MIR567	NA	miRNA	3	111831646	111831745	+
ENSG00000207942	MIR136	NA	miRNA	14	101351032	101351125	+
ENSG00000207943	MIR634	NA	miRNA	17	64783188	64783286	+
ENSG00000254710	CTD-2216M2.1	NA	antisense	11	123059508	123098985	+
ENSG00000147614	ATP6V0D2	NA	protein_coding	8	86999550	87166457	+
ENSG00000240848	RP1-211D12.3	NA	processed_transcript	20	43706475	43708618	+
ENSG00000159377	PSMB4	NA	protein_coding	1	151372008	151374420	+
ENSG00000130511	SSBP4	NA	protein_coding	19	18530219	18545371	+
ENSG00000130513	GDF15	NA	protein_coding	19	18496966	18499986	+
ENSG00000130517	PGPEP1	NA	protein_coding	19	18451406	18480763	+
ENSG00000164758	MED30	NA	protein_coding	8	118532950	118552501	+
ENSG00000164756	SLC30A8	NA	protein_coding	8	117962510	118188953	+
ENSG00000155508	CNOT8	NA	protein_coding	5	154237807	154256353	+
ENSG00000227112	RP1-86D1.4	NA	antisense	6	128826268	128827421	+
ENSG00000155506	LARP1	NA	protein_coding	5	154092460	154197167	+
ENSG00000011478	QPCTL	NA	protein_coding	19	46195739	46207247	+
ENSG00000010704	HFE	NA	protein_coding	6	26087507	26098571	+
ENSG00000081913	PHLPP1	NA	protein_coding	18	60382670	60647666	+
ENSG00000238837	RP11-646E18.2	NA	lincRNA	3	182362000	182373668	+
ENSG00000252005	U4atac	NA	snRNA	1	74349394	74349505	+
ENSG00000252009	SNORD112	NA	snoRNA	14	101463988	101464061	+
ENSG00000252008	U6	NA	snRNA	12	125386056	125386157	+
ENSG00000256713	PGA5	NA	protein_coding	11	61008512	61018920	+
ENSG00000256717	AP000797.3	NA	lincRNA	11	115530374	115713864	+
ENSG00000254822	RP11-375D13.3	NA	lincRNA	11	41898182	41898628	+
ENSG00000203910	C1orf146	NA	protein_coding	1	92683495	92711370	+
ENSG00000235504	RP3-453D15.1	NA	processed_transcript	6	99006308	99006447	+
ENSG00000231383	FGF12-AS1	NA	antisense	3	191955824	192000886	+
ENSG00000254829	RP11-7I15.3	NA	antisense	11	77726759	77727541	+
ENSG00000176920	FUT2	NA	protein_coding	19	49199226	49209207	+
ENSG00000176927	EFCAB5	NA	protein_coding	17	28256216	28435470	+
ENSG00000176925	OR51F2	NA	protein_coding	11	4842549	4843686	+
ENSG00000198162	MAN1A2	NA	protein_coding	1	117910069	118071494	+
ENSG00000198161	PPIAL4C	NA	protein_coding	1	149553001	149553787	+
ENSG00000198160	MIER1	NA	protein_coding	1	67390576	67454302	+
ENSG00000171049	FPR2	NA	protein_coding	19	52264181	52273760	+
ENSG00000231654	RPS6KA2-AS1	NA	antisense	6	167317184	167318323	+
ENSG00000175746	C15orf54	NA	protein_coding	15	39542883	39547046	+
ENSG00000231653	AC010731.3	NA	antisense	2	207504795	207506006	+
ENSG00000175745	NR2F1	NA	protein_coding	5	92919041	92930321	+
ENSG00000179674	ARL14	NA	protein_coding	3	160394946	160396233	+
ENSG00000147316	MCPH1	NA	protein_coding	8	6264111	6501144	+
ENSG00000230385	AC012507.4	NA	antisense	2	231773565	231774817	+
ENSG00000230387	RP4-737E23.2	NA	lincRNA	20	23168763	23170944	+
ENSG00000248789	CTD-2203A3.1	NA	protein_coding	5	51305647	51376821	+
ENSG00000167470	MIDN	NA	protein_coding	19	1248550	1259139	+
ENSG00000253879	RP11-379I19.3	NA	lincRNA	8	60513935	60526334	+
ENSG00000253878	RP11-347C18.3	NA	sense_intronic	8	95962263	95963624	+
ENSG00000253871	RP11-756K15.2	NA	lincRNA	8	58256344	58277416	+
ENSG00000253873	PCDHGA11	NA	protein_coding	5	140800760	140891835	+
ENSG00000253872	RP11-90D11.1	NA	lincRNA	8	96517632	96539752	+
ENSG00000253875	RP11-16P20.3	NA	antisense	8	27590853	27613943	+
ENSG00000253874	IGLVIV-66-1	NA	IG_V_pseudogene	22	22412843	22413304	+
ENSG00000240065	PSMB9	NA	protein_coding	6	32811911	32847364	+
ENSG00000256927	RP5-944M2.2	NA	lincRNA	12	126910534	126918554	+
ENSG00000249782	RP11-417J1.1	NA	lincRNA	5	8525289	8528791	+
ENSG00000148110	HIATL1	NA	protein_coding	9	97136831	97223324	+
ENSG00000034713	GABARAPL2	NA	protein_coding	16	75600247	75611779	+
ENSG00000249787	RP11-346J10.1	NA	lincRNA	5	99737143	99744603	+
ENSG00000176219	OR11H6	NA	protein_coding	14	20691789	20692964	+
ENSG00000230525	AC007403.2	NA	lincRNA	2	67131566	67198594	+
ENSG00000230526	RP11-472G21.2	NA	lincRNA	10	73638112	73638865	+
ENSG00000230522	MBD3L2	NA	protein_coding	19	7049348	7051746	+
ENSG00000146047	HIST1H2BA	NA	protein_coding	6	25727135	25727573	+
ENSG00000146049	KAAG1	NA	protein_coding	6	24357129	24358512	+
ENSG00000133135	RNF128	NA	protein_coding	X	105937022	106040223	+
ENSG00000222311	AC084882.1	NA	miRNA	15	47534399	47534476	+
ENSG00000222314	U6	NA	snRNA	10	38712551	38712656	+
ENSG00000222316	AC008581.1	NA	miRNA	5	76433790	76433901	+
ENSG00000144579	CTDSP1	NA	protein_coding	2	219263059	219270664	+
ENSG00000146592	CREB5	NA	protein_coding	7	28338938	28865511	+
ENSG00000227012	RP1-97J1.2	NA	lincRNA	6	112221690	112223054	+
ENSG00000172828	CES3	NA	protein_coding	16	66995138	67009051	+
ENSG00000249128	RP11-2N5.1	NA	lincRNA	5	117931881	117963787	+
ENSG00000141068	KSR1	NA	protein_coding	17	25783668	25953461	+
ENSG00000137309	HMGA1	NA	protein_coding	6	34204575	34214008	+
ENSG00000144681	STAC	NA	protein_coding	3	36421834	36589499	+
ENSG00000172824	CES4A	NA	protein_coding	16	67022490	67043661	+
ENSG00000241336	RP11-451G4.1	NA	lincRNA	3	154958732	154960933	+
ENSG00000173193	PARP14	NA	protein_coding	3	122399463	122449687	+
ENSG00000253035	U4atac	NA	snRNA	11	122322180	122322307	+
ENSG00000252509	RNA5SP271	NA	rRNA	8	73269961	73270050	+
ENSG00000223047	U6	NA	snRNA	10	35215701	35215810	+
ENSG00000223046	RNA5SP369	NA	rRNA	12	102230596	102230705	+
ENSG00000223042	7SK	NA	misc_RNA	12	10236783	10237089	+
ENSG00000130656	HBZ	NA	protein_coding	16	202684	204502	+
ENSG00000253973	RP11-467K18.2	NA	antisense	11	9025707	9086701	+
ENSG00000156875	HIAT1	NA	protein_coding	1	100503651	100548933	+
ENSG00000113389	NPR3	NA	protein_coding	5	32689174	32791819	+
ENSG00000223597	CTD-2296D1.5	NA	lincRNA	5	7373228	7379903	+
ENSG00000113387	SUB1	NA	protein_coding	5	32531737	32604185	+
ENSG00000099984	GSTT2	NA	protein_coding	22	24322337	24326106	+
ENSG00000235545	RP11-230B22.1	NA	antisense	1	63154151	63176365	+
ENSG00000076258	FMO4	NA	protein_coding	1	171283371	171311223	+
ENSG00000234636	MED14-AS1	NA	antisense	X	40594650	40597950	+
ENSG00000234630	LL22NC03-2H8.4	NA	lincRNA	22	22648096	22649159	+
ENSG00000234631	AL162407.1	NA	protein_coding	10	115674528	115676949	+
ENSG00000073578	SDHA	NA	protein_coding	5	218354	256815	+
ENSG00000256695	RP1-166H1.2	NA	lincRNA	12	120827347	120833797	+
ENSG00000264192	Metazoa_SRP	NA	misc_RNA	2	22145863	22146160	+
ENSG00000264194	CTB-104H12.6	NA	antisense	17	10048829	10050277	+
ENSG00000264196	RP11-171G2.1	NA	antisense	17	70835176	70835857	+
ENSG00000117266	CDK18	NA	protein_coding	1	205473721	205501921	+
ENSG00000264449	RP11-945C19.4	NA	antisense	18	5887484	5909121	+
ENSG00000156502	SUPV3L1	NA	protein_coding	10	70939986	70968854	+
ENSG00000156500	FAM122C	NA	protein_coding	X	133930817	133988640	+
ENSG00000226759	RP4-737A23.2	NA	antisense	1	58326202	58346577	+
ENSG00000267183	AC010525.6	NA	lincRNA	19	56207249	56209196	+
ENSG00000103642	LACTB	NA	protein_coding	15	63413997	63434260	+
ENSG00000103647	CORO2B	NA	protein_coding	15	68871306	69020145	+
ENSG00000263872	hsa-mir-4528	NA	miRNA	18	50763469	50763560	+
ENSG00000064687	ABCA7	NA	protein_coding	19	1040100	1065568	+
ENSG00000137413	TAF8	NA	protein_coding	6	42018249	42055199	+
ENSG00000263874	LINC00672	NA	lincRNA	17	37081419	37084310	+
ENSG00000263878	DLGAP1-AS4	NA	antisense	18	3962351	4013943	+
ENSG00000022556	NLRP2	NA	protein_coding	19	55464496	55512510	+
ENSG00000221062	MIR1292	NA	miRNA	20	2633421	2633488	+
ENSG00000226757	AC079341.1	NA	protein_coding	4	122685738	122687962	+
ENSG00000076928	ARHGEF1	NA	protein_coding	19	42387265	42411597	+
ENSG00000181072	CHRM2	NA	protein_coding	7	136553414	136705002	+
ENSG00000143337	TOR1AIP1	NA	protein_coding	1	179851175	179888412	+
ENSG00000168152	THAP9	NA	protein_coding	4	83821903	83841438	+
ENSG00000168159	RNF187	NA	protein_coding	1	228674760	228683467	+
ENSG00000168158	OR2C1	NA	protein_coding	16	3405887	3406924	+
ENSG00000111834	RSPH4A	NA	protein_coding	6	116937640	116954148	+
ENSG00000111832	RWDD1	NA	protein_coding	6	116892528	116918838	+
ENSG00000188596	C12orf55	NA	protein_coding	12	96883351	97269333	+
ENSG00000238634	AE000660.1	NA	miRNA	14	22610885	22610964	+
ENSG00000238636	snoU13	NA	snoRNA	3	154047503	154047608	+
ENSG00000240198	ARHGEF3-AS1	NA	antisense	3	56974066	56994882	+
ENSG00000167914	GSDMA	NA	protein_coding	17	38119224	38134019	+
ENSG00000237232	ZNF295-AS1	NA	lincRNA	21	43429301	43445033	+
ENSG00000265315	Metazoa_SRP	NA	misc_RNA	17	44614898	44615180	+
ENSG00000265314	MIR548AH	NA	miRNA	4	77496702	77496779	+
ENSG00000265317	AC103740.1	NA	miRNA	15	63079004	63079093	+
ENSG00000265316	RP11-286N3.1	NA	antisense	18	5463624	5480974	+
ENSG00000263253	RP11-204E4.3	NA	lincRNA	16	20220245	20220847	+
ENSG00000251125	CTD-2335O3.3	NA	lincRNA	5	50746990	50757923	+
ENSG00000251129	RP11-734I18.1	NA	lincRNA	4	31999017	32157028	+
ENSG00000019995	ZRANB1	NA	protein_coding	10	126630690	126676758	+
ENSG00000259356	RP11-90E5.1	NA	antisense	15	100666309	100669948	+
ENSG00000231428	RP11-472K17.1	NA	lincRNA	13	110705630	110707299	+
ENSG00000259354	RP11-519G16.3	NA	antisense	15	45740623	45805965	+
ENSG00000259359	RP11-327J17.2	NA	lincRNA	15	96714808	96717568	+
ENSG00000231426	RP5-899B16.1	NA	lincRNA	6	140175985	140181288	+
ENSG00000198799	LRIG2	NA	protein_coding	1	113615829	113667824	+
ENSG00000135775	COG2	NA	protein_coding	1	230778236	230829728	+
ENSG00000135773	CAPN9	NA	protein_coding	1	230883128	230937749	+
ENSG00000197775	AL136419.1	NA	protein_coding	14	24407938	24409196	+
ENSG00000147050	KDM6A	NA	protein_coding	X	44732755	44971847	+
ENSG00000175550	DRAP1	NA	protein_coding	11	65686726	65689032	+
ENSG00000165646	SLC18A2	NA	protein_coding	10	119000602	119038941	+
ENSG00000226337	RP11-274B18.4	NA	processed_transcript	9	71155950	71248176	+
ENSG00000226330	RP11-739N20.2	NA	processed_transcript	1	204346976	204404974	+
ENSG00000132740	IGHMBP2	NA	protein_coding	11	68671308	68708067	+
ENSG00000149021	SCGB1A1	NA	protein_coding	11	62172573	62190667	+
ENSG00000153029	MR1	NA	protein_coding	1	181003065	181031074	+
ENSG00000266751	MIR3661	NA	miRNA	5	133561446	133561543	+
ENSG00000266756	MIR5680	NA	miRNA	8	103137658	103137743	+
ENSG00000187021	PNLIPRP1	NA	protein_coding	10	118349935	118368687	+
ENSG00000162148	PPP1R32	NA	protein_coding	11	61248590	61258403	+
ENSG00000188629	ZNF177	NA	protein_coding	19	9435015	9493293	+
ENSG00000180035	ZNF48	NA	protein_coding	16	30389425	30411429	+
ENSG00000066855	MTFR1	NA	protein_coding	8	66556122	66683496	+
ENSG00000188620	HMX3	NA	protein_coding	10	124895476	124899995	+
ENSG00000238411	CR381670.1	NA	miRNA	21	9683189	9683272	+
ENSG00000250657	RP11-1E6.1	NA	lincRNA	4	43342890	43347617	+
ENSG00000112715	VEGFA	NA	protein_coding	6	43737948	43754224	+
ENSG00000250659	RP11-864I4.3	NA	antisense	11	62304782	62309490	+
ENSG00000258403	RP11-355I22.6	NA	lincRNA	14	62581069	62584284	+
ENSG00000258405	ZNF578	NA	protein_coding	19	52956827	53015407	+
ENSG00000090581	GNPTG	NA	protein_coding	16	1401922	1413352	+
ENSG00000222055	AC092117.1	NA	miRNA	16	2763018	2763101	+
ENSG00000250385	RP11-310P5.2	NA	antisense	5	524818	526709	+
ENSG00000164591	MYOZ3	NA	protein_coding	5	150040434	150058927	+
ENSG00000222051	U6	NA	snRNA	10	103382614	103382722	+
ENSG00000148143	ZNF462	NA	protein_coding	9	109625376	109775915	+
ENSG00000267407	CTD-2050I18.1	NA	lincRNA	19	32032943	32045703	+
ENSG00000267403	AD000864.5	NA	antisense	19	36378572	36385454	+
ENSG00000267402	RP11-619L19.2	NA	antisense	18	53159404	53163623	+
ENSG00000267401	RP11-396N11.1	NA	processed_transcript	18	57961382	57968351	+
ENSG00000104112	SCG3	NA	protein_coding	15	51973548	52013223	+
ENSG00000267409	RP11-567M16.2	NA	lincRNA	18	77370745	77372303	+
ENSG00000222158	AP003471.2	NA	miRNA	8	105437585	105437666	+
ENSG00000223901	AP001469.5	NA	antisense	21	47640181	47641992	+
ENSG00000223907	RP11-439L8.4	NA	lincRNA	1	31984034	31989846	+
ENSG00000178301	AQP11	NA	protein_coding	11	77300678	77321400	+
ENSG00000184825	HIST1H2AH	NA	protein_coding	6	27114859	27115317	+
ENSG00000242311	Metazoa_SRP	NA	misc_RNA	10	104285720	104286001	+
ENSG00000168939	SPRY3	NA	protein_coding	X	154997472	155012121	+
ENSG00000186086	NBPF6	NA	protein_coding	1	108918419	109013624	+
ENSG00000256553	TRAV1-2	NA	TR_V_gene	14	22111107	22111798	+
ENSG00000256552	RP11-113C12.3	NA	processed_transcript	12	8472975	8522151	+
ENSG00000126883	NUP214	NA	protein_coding	9	134000946	134110057	+
ENSG00000256558	RP11-713B9.1	NA	lincRNA	11	115045695	115046044	+
ENSG00000204922	C11orf83	NA	protein_coding	11	62437743	62441159	+
ENSG00000204920	ZNF155	NA	protein_coding	19	44472012	44502477	+
ENSG00000089041	P2RX7	NA	protein_coding	12	121570629	121623856	+
ENSG00000008441	NFIX	NA	protein_coding	19	13106420	13209610	+
ENSG00000234869	RP3-439F8.1	NA	antisense	22	46937390	46944093	+
ENSG00000182504	CEP97	NA	protein_coding	3	101442767	101489406	+
ENSG00000182500	ORAI1	NA	protein_coding	12	122064453	122080583	+
ENSG00000121542	SEC22A	NA	protein_coding	3	122920803	122992977	+
ENSG00000214215	C12orf74	NA	protein_coding	12	93096617	93102325	+
ENSG00000214216	IQCJ	NA	protein_coding	3	158787115	158984096	+
ENSG00000234860	RP11-547C13.1	NA	lincRNA	9	102293976	102299206	+
ENSG00000104808	DHDH	NA	protein_coding	19	49436937	49448226	+
ENSG00000234862	RP5-1097P24.1	NA	lincRNA	20	22201190	22203921	+
ENSG00000104805	NUCB1	NA	protein_coding	19	49403305	49426528	+
ENSG00000106400	ZNHIT1	NA	protein_coding	7	100860947	100867471	+
ENSG00000237411	AC003043.2	NA	antisense	17	42396994	42397584	+
ENSG00000237410	AP001092.4	NA	antisense	11	64413869	64427153	+
ENSG00000187840	EIF4EBP1	NA	protein_coding	8	37887857	37917883	+
ENSG00000199363	SNORA63	NA	snoRNA	3	183171600	183171732	+
ENSG00000199360	U6	NA	snRNA	6	111177618	111177725	+
ENSG00000199361	U1	NA	snRNA	5	40269658	40269821	+
ENSG00000199364	RNA5SP327	NA	rRNA	10	112520898	112521000	+
ENSG00000187848	P2RX2	NA	protein_coding	12	133195364	133198972	+
ENSG00000202515	VTRNA1-3	NA	misc_RNA	5	140105741	140105831	+
ENSG00000202517	SNORA64	NA	snoRNA	3	40280097	40280232	+
ENSG00000202513	U6	NA	snRNA	10	74151720	74151827	+
ENSG00000140526	ABHD2	NA	protein_coding	15	89630688	89745591	+
ENSG00000140527	WDR93	NA	protein_coding	15	90234026	90286869	+
ENSG00000140525	FANCI	NA	protein_coding	15	89787178	89860492	+
ENSG00000167107	ACSF2	NA	protein_coding	17	48503517	48552198	+
ENSG00000167105	TMEM92	NA	protein_coding	17	48348765	48358844	+
ENSG00000167104	BPIFB6	NA	protein_coding	20	31619452	31631853	+
ENSG00000207355	U6	NA	snRNA	20	24954805	24954916	+
ENSG00000207357	U6	NA	snRNA	19	1021519	1021627	+
ENSG00000111321	LTBR	NA	protein_coding	12	6484593	6500729	+
ENSG00000163376	KBTBD8	NA	protein_coding	3	67048725	67061634	+
ENSG00000255148	RP4-791M13.4	NA	antisense	1	144858172	144865800	+
ENSG00000255143	RP11-805J14.3	NA	processed_transcript	11	69975401	69995729	+
ENSG00000255142	AP006621.6	NA	antisense	11	781643	782105	+
ENSG00000254343	RP11-760H22.2	NA	lincRNA	8	121064417	121068440	+
ENSG00000227818	RP11-227F8.2	NA	lincRNA	1	162008804	162009357	+
ENSG00000178882	FAM101A	NA	protein_coding	12	124773708	124800570	+
ENSG00000128849	CGNL1	NA	protein_coding	15	57668701	57842925	+
ENSG00000241135	RP11-6F2.6	NA	lincRNA	3	156807668	156818924	+
ENSG00000225523	IGKV6D-21	NA	IG_V_gene	2	90060375	90060995	+
ENSG00000225528	RP3-370M22.8	NA	sense_intronic	22	40356399	40360687	+
ENSG00000179820	MYADM	NA	protein_coding	19	54369475	54379691	+
ENSG00000179826	MRGPRX3	NA	protein_coding	11	18142500	18160027	+
ENSG00000162426	SLC45A1	NA	protein_coding	1	8377884	8404227	+
ENSG00000200829	Y_RNA	NA	misc_RNA	2	20680603	20680716	+
ENSG00000200822	Y_RNA	NA	misc_RNA	2	223269702	223269814	+
ENSG00000200823	SNORD114-2	NA	snoRNA	14	101418191	101418270	+
ENSG00000200827	U6	NA	snRNA	18	12098424	12098531	+
ENSG00000204119	DMRTC1-AS1	NA	protein_coding	X	72158001	72158798	+
ENSG00000204110	RP1-153P14.8	NA	lincRNA	6	37475122	37503392	+
ENSG00000204116	CHIC1	NA	protein_coding	X	72783042	72904246	+
ENSG00000204117	RP4-640H8.2	NA	lincRNA	20	36305310	36311636	+
ENSG00000201196	Y_RNA	NA	misc_RNA	10	54612365	54612463	+
ENSG00000222610	U6	NA	snRNA	5	98225433	98225537	+
ENSG00000137145	DENND4C	NA	protein_coding	9	19290747	19374139	+
ENSG00000201198	U6	NA	snRNA	12	57809077	57809186	+
ENSG00000250620	RP11-91J3.3	NA	lincRNA	4	188334716	188336851	+
ENSG00000257556	RP11-44N21.1	NA	lincRNA	14	105559944	105565341	+
ENSG00000233889	AL353698.1	NA	protein_coding	X	56100755	56102014	+
ENSG00000252257	7SK	NA	misc_RNA	3	181686245	181686469	+
ENSG00000233882	RP11-309H21.2	NA	lincRNA	1	191190287	191197597	+
ENSG00000001561	ENPP4	NA	protein_coding	6	46097699	46114435	+
ENSG00000159128	IFNGR2	NA	protein_coding	21	34775200	34851655	+
ENSG00000130227	XPO7	NA	protein_coding	8	21777178	21864096	+
ENSG00000253251	CTC-534A2.2	NA	protein_coding	5	64920590	64926718	+
ENSG00000129038	LOXL1	NA	protein_coding	15	74218797	74244478	+
ENSG00000205246	RPSAP58	NA	protein_coding	19	23945805	24010937	+
ENSG00000263839	CR381653.2	NA	miRNA	21	10199941	10200025	+
ENSG00000258399	MEG8	NA	lincRNA	14	101361105	101402336	+
ENSG00000232821	AC003986.6	NA	antisense	7	19152095	19153894	+
ENSG00000232827	RP11-211N8.7	NA	processed_transcript	9	46826490	46833319	+
ENSG00000232825	RP5-896L10.1	NA	processed_transcript	1	99469830	99614408	+
ENSG00000263932	MIR4448	NA	miRNA	3	183604586	183604673	+
ENSG00000235890	TSPEAR-AS1	NA	antisense	21	45926688	45935738	+
ENSG00000037749	MFAP3	NA	protein_coding	5	153418464	153437014	+
ENSG00000170525	PFKFB3	NA	protein_coding	10	6186879	6277495	+
ENSG00000198553	KCNRG	NA	protein_coding	13	50589388	50595058	+
ENSG00000198551	ZNF627	NA	protein_coding	19	11670261	11729950	+
ENSG00000198556	ZNF789	NA	protein_coding	7	99070462	99101273	+
ENSG00000160712	IL6R	NA	protein_coding	1	154377667	154441926	+
ENSG00000136950	ARPC5L	NA	protein_coding	9	127624407	127640003	+
ENSG00000215162	LINC00269	NA	lincRNA	X	68399398	68429767	+
ENSG00000083307	GRHL2	NA	protein_coding	8	102504658	102681954	+
ENSG00000175467	SART1	NA	protein_coding	11	65729158	65747299	+
ENSG00000181214	OR8G2P	NA	pseudogene	11	124095435	124096365	+
ENSG00000175463	TBC1D10C	NA	protein_coding	11	67171384	67177560	+
ENSG00000092140	G2E3	NA	protein_coding	14	31028327	31089269	+
ENSG00000132185	FCRLA	NA	protein_coding	1	161676760	161684141	+
ENSG00000108639	SYNGR2	NA	protein_coding	17	76164637	76169608	+
ENSG00000237994	RP1-146A15.1	NA	sense_intronic	X	28960165	28960685	+
ENSG00000237996	RP11-258A12.3	NA	sense_intronic	10	114843551	114846535	+
ENSG00000237992	AC010096.2	NA	lincRNA	2	19675209	19688611	+
ENSG00000199609	RNA5SP124	NA	rRNA	3	14436146	14436257	+
ENSG00000225643	RP11-70P17.1	NA	lincRNA	1	25907967	25916847	+
ENSG00000135205	CCDC146	NA	protein_coding	7	76751749	76924521	+
ENSG00000199601	U6	NA	snRNA	X	74422536	74422644	+
ENSG00000131981	LGALS3	NA	protein_coding	14	55590826	55612121	+
ENSG00000188021	UBQLN2	NA	protein_coding	X	56590024	56593443	+
ENSG00000199605	RNY4P24	NA	misc_RNA	13	52974137	52974234	+
ENSG00000149043	SYT8	NA	protein_coding	11	1848707	1858751	+
ENSG00000240747	KRBOX1	NA	protein_coding	3	42850973	42984284	+
ENSG00000240742	RP11-465L10.7	NA	processed_transcript	20	44650413	44656438	+
ENSG00000214691	AC104654.1	NA	lincRNA	2	42104212	42121179	+
ENSG00000214694	ARHGEF33	NA	protein_coding	2	39117019	39202590	+
ENSG00000214696	AC007347.1	NA	pseudogene	16	54146968	54148378	+
ENSG00000172167	MTBP	NA	protein_coding	8	121457664	121535875	+
ENSG00000131016	AKAP12	NA	protein_coding	6	151561132	151679692	+
ENSG00000230483	AC124057.5	NA	antisense	11	2425743	2429138	+
ENSG00000157227	MMP14	NA	protein_coding	14	23305764	23316970	+
ENSG00000264229	RNU4ATAC	NA	antisense	2	122288455	122288583	+
ENSG00000264222	RP11-757O6.1	NA	lincRNA	18	14244622	14252139	+
ENSG00000222297	U6	NA	snRNA	11	125444613	125444714	+
ENSG00000148386	LCN9	NA	protein_coding	9	138555166	138557949	+
ENSG00000214347	AC011491.1	NA	protein_coding	19	6396354	6412415	+
ENSG00000020426	MNAT1	NA	protein_coding	14	61201478	61436671	+
ENSG00000203480	AC061975.6	NA	pseudogene	17	26568403	26568558	+
ENSG00000138111	TMEM180	NA	protein_coding	10	104221147	104236802	+
ENSG00000172789	HOXC5	NA	protein_coding	12	54426635	54429142	+
ENSG00000150201	FXYD4	NA	protein_coding	10	43867088	43871781	+
ENSG00000144724	PTPRG	NA	protein_coding	3	61547583	62283288	+
ENSG00000236119	AP000688.15	NA	lincRNA	21	37455155	37462712	+
ENSG00000236112	AC006035.2	NA	protein_coding	7	16128778	16129265	+
ENSG00000236117	RP4-754E20__A.5	NA	lincRNA	22	43796335	43805687	+
ENSG00000236115	RP11-62C3.6	NA	antisense	9	94967636	94972440	+
ENSG00000196927	AC009093.1	NA	pseudogene	16	29259548	29261449	+
ENSG00000224922	AL050303.7	NA	lincRNA	21	15142251	15144061	+
ENSG00000265577	Metazoa_SRP	NA	misc_RNA	5	69370671	69370944	+
ENSG00000233695	GAS6-AS1	NA	antisense	13	114518601	114542321	+
ENSG00000117877	CD3EAP	NA	protein_coding	19	45909465	45914024	+
ENSG00000156687	UNC5D	NA	protein_coding	8	35092973	35654068	+
ENSG00000232124	AP001057.1	NA	antisense	21	45621171	45622579	+
ENSG00000232120	RP11-349P19.1	NA	antisense	6	65087686	65122672	+
ENSG00000238189	ENOX1-AS2	NA	lincRNA	13	44032599	44033259	+
ENSG00000232129	AC011385.2	NA	pseudogene	5	137887848	137888050	+
ENSG00000116473	RAP1A	NA	protein_coding	1	112084838	112259313	+
ENSG00000112996	MRPS30	NA	protein_coding	5	44809025	44815624	+
ENSG00000112992	NNT	NA	protein_coding	5	43602793	43707507	+
ENSG00000116478	HDAC1	NA	protein_coding	1	32757685	32799236	+
ENSG00000252595	7SK	NA	misc_RNA	4	42894411	42894635	+
ENSG00000099864	PALM	NA	protein_coding	19	708951	748329	+
ENSG00000099860	GADD45B	NA	protein_coding	19	2476123	2478257	+
ENSG00000252733	AC067718.1	NA	miRNA	3	189861443	189861532	+
ENSG00000197324	LRP10	NA	protein_coding	14	23340820	23350789	+
ENSG00000106245	BUD31	NA	protein_coding	7	99006262	99017239	+
ENSG00000072210	ALDH3A2	NA	protein_coding	17	19551447	19580911	+
ENSG00000266171	RP11-769O8.1	NA	antisense	18	735744	737459	+
ENSG00000266174	MIR4666A	NA	miRNA	1	228649773	228649853	+
ENSG00000212348	U6	NA	snRNA	8	74960910	74961019	+
ENSG00000100836	PABPN1	NA	protein_coding	14	23790496	23795394	+
ENSG00000212340	U6	NA	snRNA	3	64497429	64497533	+
ENSG00000212342	SNORA12	NA	snoRNA	8	131175216	131175373	+
ENSG00000250874	CTC-480C2.1	NA	lincRNA	5	84959048	84960502	+
ENSG00000228124	RP1-122O8.7	NA	antisense	6	90383186	90385502	+
ENSG00000228127	RP11-12L8.1	NA	lincRNA	1	116461995	116468529	+
ENSG00000228126	LINC00568	NA	lincRNA	1	150488231	150490508	+
ENSG00000234407	FAM74A6	NA	lincRNA	9	41516044	41523018	+
ENSG00000234405	LL0XNC01-250H12.3	NA	antisense	X	102752449	102755245	+
ENSG00000142765	SYTL1	NA	protein_coding	1	27668511	27680421	+
ENSG00000113643	RARS	NA	protein_coding	5	167913448	167946304	+
ENSG00000113645	WWC1	NA	protein_coding	5	167718654	167899308	+
ENSG00000113649	TCERG1	NA	protein_coding	5	145826873	145891524	+
ENSG00000264769	RP11-498C9.12	NA	antisense	17	79880773	79882387	+
ENSG00000264765	RP11-92B11.4	NA	lincRNA	17	16557216	16558101	+
ENSG00000264764	MIR4772	NA	miRNA	2	103048747	103048826	+
ENSG00000264763	MIR4295	NA	miRNA	10	114393927	114394013	+
ENSG00000264761	Metazoa_SRP	NA	misc_RNA	7	66445105	66445395	+
ENSG00000189037	DUSP21	NA	protein_coding	X	44703247	44704130	+
ENSG00000111640	GAPDH	NA	protein_coding	12	6643091	6647537	+
ENSG00000267225	RP11-383D22.2	NA	3prime_overlapping_ncrna	18	54695061	54706076	+
ENSG00000267224	AC005498.4	NA	lincRNA	19	57046666	57047132	+
ENSG00000267222	RP11-194N12.2	NA	sense_intronic	17	40647883	40648568	+
ENSG00000103569	AQP9	NA	protein_coding	15	58430366	58478110	+
ENSG00000142494	SLC47A1	NA	protein_coding	17	19436773	19482347	+
ENSG00000263934	SNORD3A	NA	lincRNA	17	19091327	19092027	+
ENSG00000263933	AL365502.1	NA	miRNA	9	140440198	140440285	+
ENSG00000258292	RP11-536G4.1	NA	protein_coding	12	96196873	96217085	+
ENSG00000263938	RP11-579O24.3	NA	sense_intronic	17	57043311	57044088	+
ENSG00000261685	RP11-401P9.4	NA	lincRNA	16	50679718	50683160	+
ENSG00000261682	RP11-19N8.7	NA	lincRNA	16	33140635	33145820	+
ENSG00000266692	snoZ6	NA	snoRNA	21	45857002	45857058	+
ENSG00000262332	RP11-517A5.7	NA	antisense	16	16316882	16318118	+
ENSG00000262339	RP11-1197K16.2	NA	antisense	17	80936399	80939614	+
ENSG00000229654	RP1-60O19.2	NA	lincRNA	6	107143408	107147869	+
ENSG00000263680	RP11-57A1.1	NA	processed_transcript	17	70422078	70424796	+
ENSG00000229656	RP11-462L8.1	NA	lincRNA	10	33247771	33371030	+
ENSG00000263688	RP11-386P4.1	NA	lincRNA	18	30161489	30162791	+
ENSG00000251383	RP11-542G1.3	NA	lincRNA	4	76279284	76287776	+
ENSG00000184254	ALDH1A3	NA	protein_coding	15	101417917	101456831	+
ENSG00000221403	AC096633.1	NA	miRNA	1	200113960	200114063	+
ENSG00000221405	AC123768.2	NA	miRNA	15	32895486	32895570	+
ENSG00000187783	TMEM72	NA	protein_coding	10	45406646	45432450	+
ENSG00000008226	DLEC1	NA	protein_coding	3	38080694	38165040	+
ENSG00000187786	SCXB	NA	protein_coding	8	145321515	145323045	+
ENSG00000182368	FAM27A	NA	protein_coding	9	45727105	45728274	+
ENSG00000166529	ZSCAN21	NA	protein_coding	7	99647388	99662661	+
ENSG00000259312	RP11-522B15.5	NA	processed_transcript	15	96981798	96987496	+
ENSG00000182362	YBEY	NA	protein_coding	21	47706249	47717665	+
ENSG00000244439	RP4-655L22.2	NA	processed_transcript	X	119745182	119754929	+
ENSG00000244438	Metazoa_SRP	NA	misc_RNA	15	75585023	75585300	+
ENSG00000229382	BX322557.13	NA	lincRNA	21	46756620	46758580	+
ENSG00000229380	AC147651.5	NA	antisense	7	601593	605256	+
ENSG00000238406	U7	NA	snRNA	9	131306193	131306256	+
ENSG00000238405	RNA5SP311	NA	rRNA	10	46742026	46742143	+
ENSG00000238403	snoU13	NA	snoRNA	17	80540379	80540476	+
ENSG00000238402	snoU13	NA	snoRNA	9	75142150	75142255	+
ENSG00000260790	RP11-21M24.2	NA	antisense	16	22386178	22389501	+
ENSG00000184785	CXorf69	NA	protein_coding	X	134124966	134126501	+
ENSG00000259255	RP11-627D16.1	NA	lincRNA	15	46985484	47097042	+
ENSG00000259254	CTD-2339L15.3	NA	sense_intronic	15	40935129	40939055	+
ENSG00000259251	RP11-643M14.1	NA	antisense	15	62352700	62354633	+
ENSG00000259250	RP11-50C13.1	NA	antisense	15	58879704	58883875	+
ENSG00000182093	WRB	NA	protein_coding	21	40752168	40800301	+
ENSG00000254563	RP11-673F18.1	NA	antisense	11	78460293	78467525	+
ENSG00000254561	RP11-196E1.3	NA	antisense	11	119479133	119529994	+
ENSG00000260244	RP11-588K22.2	NA	sense_overlapping	4	156655598	156658214	+
ENSG00000119514	GALNT12	NA	protein_coding	9	101569979	101612363	+
ENSG00000254568	RP11-664I21.5	NA	antisense	11	124753585	124757685	+
ENSG00000258610	RP11-488C13.7	NA	lincRNA	14	77245293	77248592	+
ENSG00000050130	JKAMP	NA	protein_coding	14	59951159	59971429	+
ENSG00000238331	AC100791.2	NA	miRNA	17	77784476	77784573	+
ENSG00000154269	ENPP3	NA	protein_coding	6	131949599	132068553	+
ENSG00000169981	ZNF35	NA	protein_coding	3	44690217	44702283	+
ENSG00000215298	AC051642.1	NA	protein_coding	8	23430155	23432974	+
ENSG00000187258	NPSR1	NA	protein_coding	7	34697849	34917944	+
ENSG00000180209	MYLPF	NA	protein_coding	16	30382253	30389312	+
ENSG00000242875	RBMY1B	NA	protein_coding	Y	23673222	23687672	+
ENSG00000245479	RP11-387D10.3	NA	sense_overlapping	15	91203463	91208198	+
ENSG00000165388	ZNF488	NA	protein_coding	10	48355022	48373866	+
ENSG00000183579	ZNRF3	NA	protein_coding	22	29279578	29453475	+
ENSG00000250027	RP11-563E2.2	NA	antisense	4	164029935	164041117	+
ENSG00000257034	AL021707.2	NA	pseudogene	22	39127776	39128531	+
ENSG00000116863	ADPRHL2	NA	protein_coding	1	36554474	36559533	+
ENSG00000202239	U6	NA	snRNA	21	47945529	47945635	+
ENSG00000202233	U3	NA	snoRNA	7	25304273	25304377	+
ENSG00000102349	KLF8	NA	protein_coding	X	56258868	56314322	+
ENSG00000242290	RP11-197K3.1	NA	lincRNA	3	114172438	114238979	+
ENSG00000155130	MARCKS	NA	protein_coding	6	114178539	114184648	+
ENSG00000165685	TMEM52B	NA	protein_coding	12	10323139	10344400	+
ENSG00000159455	LCE2B	NA	protein_coding	1	152647769	152659877	+
ENSG00000266715	MIR5090	NA	miRNA	7	102106187	102106273	+
ENSG00000107651	SEC23IP	NA	protein_coding	10	121652221	121701658	+
ENSG00000006282	SPATA20	NA	protein_coding	17	48624448	48633213	+
ENSG00000006283	CACNA1G	NA	protein_coding	17	48638427	48704835	+
ENSG00000186868	MAPT	NA	protein_coding	17	43971746	44105700	+
ENSG00000253642	RP11-317N12.1	NA	lincRNA	8	33462372	33896526	+
ENSG00000153064	BANK1	NA	protein_coding	4	102341116	102995969	+
ENSG00000253647	CTD-2270F17.1	NA	antisense	5	169816495	169849848	+
ENSG00000253648	RP11-77B22.2	NA	lincRNA	8	15830822	15857833	+
ENSG00000174004	LRRC33	NA	protein_coding	3	196366555	196388875	+
ENSG00000198718	FAM179B	NA	protein_coding	14	45431409	45543634	+
ENSG00000242128	AC079767.2	NA	processed_transcript	2	208461887	208464480	+
ENSG00000242121	Metazoa_SRP	NA	misc_RNA	2	183179009	183179269	+
ENSG00000198711	C1orf191	NA	protein_coding	1	54703708	54704736	+
ENSG00000266713	AC009695.1	NA	miRNA	8	21351537	21351627	+
ENSG00000242125	SNHG3	NA	processed_transcript	1	28832490	28837404	+
ENSG00000100151	PICK1	NA	protein_coding	22	38452316	38471708	+
ENSG00000100150	DEPDC5	NA	protein_coding	22	32149942	32303001	+
ENSG00000161609	CCDC155	NA	protein_coding	19	49891473	49921256	+
ENSG00000243452	NBPF15	NA	protein_coding	1	148560841	148596267	+
ENSG00000125740	FOSB	NA	protein_coding	19	45971251	45978437	+
ENSG00000251864	Y_RNA	NA	misc_RNA	6	36640613	36640721	+
ENSG00000251865	U6	NA	snRNA	17	56913258	56913355	+
ENSG00000251866	SCARNA21	NA	snoRNA	1	15868658	15868799	+
ENSG00000203547	AL135901.1	NA	pseudogene	13	50243038	50243254	+
ENSG00000251860	snoU13	NA	snoRNA	17	7514497	7514591	+
ENSG00000251861	SCARNA20	NA	snoRNA	1	204697117	204697234	+
ENSG00000203543	AL353671.2	NA	pseudogene	9	32547879	32548148	+
ENSG00000167600	CYP2S1	NA	protein_coding	19	41699113	41713443	+
ENSG00000167601	AXL	NA	protein_coding	19	41725106	41767670	+
ENSG00000256073	C21orf119	NA	protein_coding	21	33765437	33766269	+
ENSG00000256071	RP11-465L8.1	NA	antisense	12	118327257	118328813	+
ENSG00000243989	ACY1	NA	protein_coding	3	52009064	52023213	+
ENSG00000243980	Metazoa_SRP	NA	misc_RNA	Y	14394175	14394465	+
ENSG00000178457	LINC00314	NA	lincRNA	21	29385680	29395552	+
ENSG00000042832	TG	NA	protein_coding	8	133879203	134147147	+
ENSG00000096717	SIRT1	NA	protein_coding	10	69644425	69678147	+
ENSG00000252515	U6	NA	snRNA	1	25667460	25667525	+
ENSG00000252519	U6	NA	snRNA	11	23871322	23871428	+
ENSG00000252518	U6	NA	snRNA	2	37186503	37186605	+
ENSG00000199446	U6	NA	snRNA	10	64869897	64870006	+
ENSG00000199442	Y_RNA	NA	misc_RNA	1	248160300	248160398	+
ENSG00000237200	ZBTB40-IT1	NA	sense_intronic	1	22843965	22846201	+
ENSG00000177337	DLGAP1-AS1	NA	antisense	18	3593728	3598350	+
ENSG00000240184	PCDHGC3	NA	protein_coding	5	140855578	140892542	+
ENSG00000228618	AC012462.3	NA	lincRNA	2	216341388	216344971	+
ENSG00000237208	RP11-13E5.2	NA	lincRNA	X	125243743	125249545	+
ENSG00000240183	Metazoa_SRP	NA	misc_RNA	2	112687750	112688041	+
ENSG00000078403	MLLT10	NA	protein_coding	10	21823092	22032559	+
ENSG00000266854	AP003096.1	NA	miRNA	11	68386965	68387063	+
ENSG00000166959	MS4A8B	NA	protein_coding	11	60467045	60483284	+
ENSG00000239314	MORC1-AS1	NA	antisense	3	108820301	108829189	+
ENSG00000065485	PDIA5	NA	protein_coding	3	122785915	122880951	+
ENSG00000257859	RP11-266E14.1	NA	lincRNA	12	106097979	106137840	+
ENSG00000249379	RP1-27K12.4	NA	antisense	6	53367981	53371717	+
ENSG00000241587	Metazoa_SRP	NA	misc_RNA	3	66374277	66374574	+
ENSG00000200163	SNORD115-18	NA	snoRNA	15	25448372	25448455	+
ENSG00000200162	Y_RNA	NA	misc_RNA	3	153325164	153325268	+
ENSG00000241588	Metazoa_SRP	NA	misc_RNA	15	100331395	100331649	+
ENSG00000200164	Y_RNA	NA	misc_RNA	16	69225024	69225126	+
ENSG00000201780	U6	NA	snRNA	12	8637340	8637448	+
ENSG00000201782	7SK	NA	misc_RNA	8	129232748	129233049	+
ENSG00000060642	PIGV	NA	protein_coding	1	27113961	27124889	+
ENSG00000128652	HOXD3	NA	protein_coding	2	177001683	177039577	+
ENSG00000128654	MTX2	NA	protein_coding	2	177134145	177202753	+
ENSG00000200789	U1	NA	snRNA	10	85763086	85763235	+
ENSG00000200788	Y_RNA	NA	misc_RNA	9	130233152	130233266	+
ENSG00000200786	RNA5SP234	NA	rRNA	7	79283423	79283543	+
ENSG00000122034	GTF3A	NA	protein_coding	13	27998679	28009825	+
ENSG00000122035	RASL11A	NA	protein_coding	13	27844462	27847827	+
ENSG00000212620	SNORA75	NA	snoRNA	4	80764254	80764382	+
ENSG00000204099	NEU4	NA	protein_coding	2	242749918	242758739	+
ENSG00000067141	NEO1	NA	protein_coding	15	73344049	73597547	+
ENSG00000173548	SNX33	NA	protein_coding	15	75940245	75954642	+
ENSG00000204091	TDRG1	NA	antisense	6	40302691	40347624	+
ENSG00000232324	AC008440.10	NA	lincRNA	19	54368015	54369394	+
ENSG00000174013	FBXO45	NA	protein_coding	3	196295480	196315930	+
ENSG00000174015	SPERT	NA	protein_coding	13	46276444	46288694	+
ENSG00000174016	FAM46D	NA	protein_coding	X	79591001	79700810	+
ENSG00000235118	AC010731.4	NA	antisense	2	207507140	207514173	+
ENSG00000232328	AC011286.1	NA	lincRNA	2	237642023	237663006	+
ENSG00000206788	U6	NA	snRNA	2	178903627	178903731	+
ENSG00000213442	RPL18AP3	NA	pseudogene	12	104659054	104659669	+
ENSG00000206782	U6	NA	snRNA	4	132194395	132194503	+
ENSG00000206785	SNORA15	NA	snoRNA	7	65225037	65225173	+
ENSG00000206784	Y_RNA	NA	misc_RNA	9	37322254	37322368	+
ENSG00000206787	RNU6-76	NA	snRNA	13	19454192	19454297	+
ENSG00000206786	U6	NA	snRNA	5	118474552	118474660	+
ENSG00000249086	AC051649.12	NA	processed_transcript	11	1885405	1887897	+
ENSG00000116017	ARID3A	NA	protein_coding	19	925998	975939	+
ENSG00000254009	IGKV2D-38	NA	IG_V_pseudogene	2	89911271	89911512	+
ENSG00000254008	LINC00051	NA	antisense	8	143279715	143290364	+
ENSG00000254001	RP11-91P17.1	NA	lincRNA	8	79060334	79066148	+
ENSG00000242976	Metazoa_SRP	NA	misc_RNA	5	153134940	153135238	+
ENSG00000254003	CTB-167B5.1	NA	antisense	7	87845973	87848541	+
ENSG00000130287	NCAN	NA	protein_coding	19	19322836	19363042	+
ENSG00000267151	hsa-mir-2117	NA	lincRNA	17	41522073	41528568	+
ENSG00000154743	TSEN2	NA	protein_coding	3	12525929	12581119	+
ENSG00000239821	Metazoa_SRP	NA	misc_RNA	19	18444084	18444381	+
ENSG00000265162	hsa-mir-3179-3	NA	miRNA	16	14995363	14995448	+
ENSG00000265160	MIR5003	NA	miRNA	5	172089166	172089266	+
ENSG00000234245	RP11-94I2.4	NA	lincRNA	1	145952370	145956451	+
ENSG00000234244	RP11-139J15.5	NA	lincRNA	10	19035360	19036782	+
ENSG00000265165	MIR4307	NA	miRNA	14	27377846	27377931	+
ENSG00000265168	RP11-192H23.5	NA	antisense	17	26900133	26901261	+
ENSG00000265169	AC034187.3	NA	miRNA	3	8741695	8741784	+
ENSG00000247925	RP3-510L9.1	NA	antisense	6	11173683	11259332	+
ENSG00000170222	ADPRM	NA	protein_coding	17	10600909	10614550	+
ENSG00000240977	Metazoa_SRP	NA	misc_RNA	2	140740251	140740553	+
ENSG00000240972	MIF	NA	protein_coding	22	24236189	24237413	+
ENSG00000231149	RP11-10J18.3	NA	antisense	9	127277215	127278335	+
ENSG00000171570	EGLN2	NA	protein_coding	19	41305046	41314336	+
ENSG00000120306	CYSTM1	NA	protein_coding	5	139554225	139623372	+
ENSG00000231141	TTTY3	NA	lincRNA	Y	27874635	27879535	+
ENSG00000171574	ZNF584	NA	protein_coding	19	58920061	58929690	+
ENSG00000135502	SLC26A10	NA	protein_coding	12	58013691	58019933	+
ENSG00000135503	ACVR1B	NA	protein_coding	12	52345449	52390862	+
ENSG00000087128	TMPRSS11E	NA	protein_coding	4	69313165	69363322	+
ENSG00000135506	OS9	NA	protein_coding	12	58087736	58115340	+
ENSG00000230894	RP11-67K19.3	NA	antisense	9	119330726	119348607	+
ENSG00000248343	RP11-556G22.2	NA	antisense	4	21699071	21720649	+
ENSG00000163702	IL17RC	NA	protein_coding	3	9958756	9975305	+
ENSG00000248346	RP11-292D4.1	NA	lincRNA	4	147878588	147896609	+
ENSG00000201707	U6	NA	snRNA	4	89122853	89122962	+
ENSG00000174903	RAB1B	NA	protein_coding	11	66036002	66044963	+
ENSG00000102760	RGCC	NA	protein_coding	13	42031693	42045018	+
ENSG00000198455	ZXDB	NA	protein_coding	X	57618267	57623906	+
ENSG00000198454	C9orf141	NA	protein_coding	9	139863693	139866442	+
ENSG00000198453	ZNF568	NA	protein_coding	19	37407229	37488834	+
ENSG00000109790	KLHL5	NA	protein_coding	4	39046657	39128477	+
ENSG00000109794	FAM149A	NA	protein_coding	4	187025571	187093821	+
ENSG00000201609	U4	NA	snRNA	1	19837085	19837227	+
ENSG00000147481	SNTG1	NA	protein_coding	8	50822347	51706678	+
ENSG00000230239	RP11-108M9.2	NA	antisense	1	17181900	17185779	+
ENSG00000230234	RP1-276N6.2	NA	lincRNA	6	160693647	160697162	+
ENSG00000230233	AF240627.2	NA	lincRNA	21	19986747	20022678	+
ENSG00000136856	SLC2A8	NA	protein_coding	9	130159419	130170177	+
ENSG00000136854	STXBP1	NA	protein_coding	9	130374542	130454995	+
ENSG00000132570	PCBD2	NA	protein_coding	5	134240594	134305350	+
ENSG00000099246	RAB18	NA	protein_coding	10	27793195	27831143	+
ENSG00000248545	RP11-302F12.3	NA	lincRNA	4	25610331	25621087	+
ENSG00000066379	ZNRD1	NA	protein_coding	6	30029029	30032686	+
ENSG00000132394	EEFSEC	NA	protein_coding	3	127872295	128127485	+
ENSG00000145390	USP53	NA	protein_coding	4	120133789	120216672	+
ENSG00000133627	ACTR3B	NA	protein_coding	7	152456832	152552463	+
ENSG00000138639	ARHGAP24	NA	protein_coding	4	86396265	86923823	+
ENSG00000265987	RP11-16C1.3	NA	antisense	17	73340484	73369743	+
ENSG00000265981	MIR544B	NA	miRNA	3	124451284	124451363	+
ENSG00000255480	RP4-710M3.2	NA	antisense	11	30447097	30450815	+
ENSG00000101442	ACTR5	NA	protein_coding	20	37377083	37400834	+
ENSG00000101443	WFDC2	NA	protein_coding	20	44098344	44110172	+
ENSG00000101440	ASIP	NA	protein_coding	20	32782373	32857150	+
ENSG00000101447	FAM83D	NA	protein_coding	20	37554953	37581703	+
ENSG00000259985	RP11-549B18.1	NA	antisense	18	29265616	29266786	+
ENSG00000101445	PPP1R16B	NA	protein_coding	20	37434346	37551667	+
ENSG00000145649	GZMA	NA	protein_coding	5	54398474	54406080	+
ENSG00000259989	CTD-2555A7.1	NA	lincRNA	16	89050438	89061777	+
ENSG00000214063	TSPAN4	NA	protein_coding	11	842806	867116	+
ENSG00000137812	CASC5	NA	protein_coding	15	40886216	40956540	+
ENSG00000137814	HAUS2	NA	protein_coding	15	42841006	42862192	+
ENSG00000249639	CTB-138E5.1	NA	antisense	5	134786301	134794387	+
ENSG00000137818	RPLP1	NA	protein_coding	15	69745121	69748255	+
ENSG00000137819	PAQR5	NA	protein_coding	15	69591284	69700119	+
ENSG00000172336	POP7	NA	protein_coding	7	100303674	100305118	+
ENSG00000202039	U6	NA	snRNA	7	5219690	5219793	+
ENSG00000223282	7SK	NA	misc_RNA	1	226633636	226633993	+
ENSG00000239170	snoU13	NA	snoRNA	2	233543671	233543775	+
ENSG00000239172	snoU13	NA	snoRNA	16	22492793	22492898	+
ENSG00000236306	RP11-33G16.1	NA	lincRNA	9	25780052	25784560	+
ENSG00000170647	TMEM133	NA	protein_coding	11	100862809	100864663	+
ENSG00000174099	MSRB3	NA	protein_coding	12	65672421	65882024	+
ENSG00000222486	RNU6-77	NA	snRNA	13	81839880	81839972	+
ENSG00000138092	CENPO	NA	protein_coding	2	25016012	25045245	+
ENSG00000054148	PHPT1	NA	protein_coding	9	139743174	139745488	+
ENSG00000224239	AC090044.2	NA	lincRNA	3	898805	899774	+
ENSG00000229876	RP11-199O14.1	NA	lincRNA	20	6427368	6509106	+
ENSG00000208004	MIR323B	NA	miRNA	14	101522554	101522637	+
ENSG00000224888	RP5-1142A6.2	NA	antisense	16	88797586	88807826	+
ENSG00000222732	AC008671.1	NA	miRNA	5	171706204	171706319	+
ENSG00000144118	RALB	NA	protein_coding	2	120997638	121052285	+
ENSG00000144115	THNSL2	NA	protein_coding	2	88469833	88486146	+
ENSG00000259654	RP11-245C17.2	NA	antisense	15	85229113	85230177	+
ENSG00000100312	ACR	NA	protein_coding	22	51176622	51183762	+
ENSG00000100314	CABP7	NA	protein_coding	22	30116071	30127828	+
ENSG00000104679	R3HCC1	NA	protein_coding	8	23145419	23153792	+
ENSG00000238221	RP11-69L16.4	NA	antisense	6	7276262	7299105	+
ENSG00000156873	PHKG2	NA	protein_coding	16	30759589	30772490	+
ENSG00000203783	PRR9	NA	protein_coding	1	153190058	153191793	+
ENSG00000203780	FANK1	NA	protein_coding	10	127585106	127698161	+
ENSG00000261184	RP11-196O2.1	NA	sense_overlapping	7	36134880	36140263	+
ENSG00000112818	MEP1A	NA	protein_coding	6	46761125	46807515	+
ENSG00000182938	OTOP3	NA	protein_coding	17	72931895	72946083	+
ENSG00000181374	CCL13	NA	protein_coding	17	32683469	32685629	+
ENSG00000144426	NBEAL1	NA	protein_coding	2	203879600	204091101	+
ENSG00000112812	PRSS16	NA	protein_coding	6	27215478	27224250	+
ENSG00000254304	RP11-1049H7.1	NA	processed_transcript	8	2104672	2142690	+
ENSG00000227245	RP11-136C24.2	NA	lincRNA	3	43128969	43129560	+
ENSG00000064199	SPA17	NA	protein_coding	11	124543692	124567414	+
ENSG00000109906	ZBTB16	NA	protein_coding	11	113930313	114121398	+
ENSG00000231856	RP11-327P2.5	NA	antisense	13	52378431	52387356	+
ENSG00000100722	ZC3H14	NA	protein_coding	14	89029251	89079853	+
ENSG00000262983	AF001550.7	NA	antisense	16	21206166	21217298	+
ENSG00000260859	RP11-254F19.2	NA	sense_intronic	16	84861867	84862848	+
ENSG00000260855	RP11-439E19.10	NA	antisense	1	246935601	246939074	+
ENSG00000169660	HEXDC	NA	protein_coding	17	80376192	80400521	+
ENSG00000261729	GS1-204I12.4	NA	lincRNA	1	185624132	185626300	+
ENSG00000156298	TSPAN7	NA	protein_coding	X	38420621	38548167	+
ENSG00000261720	RP11-161M6.5	NA	lincRNA	16	1115238	1116502	+
ENSG00000261723	CTD-2196E14.3	NA	processed_transcript	16	23617160	23635428	+
ENSG00000168398	BDKRB2	NA	protein_coding	14	96671014	96710666	+
ENSG00000168397	ATG4B	NA	protein_coding	2	242576626	242613272	+
ENSG00000168395	ING5	NA	protein_coding	2	242641453	242668893	+
ENSG00000197822	OCLN	NA	protein_coding	5	68788117	68853931	+
ENSG00000197826	C4orf22	NA	protein_coding	4	81256872	81884910	+
ENSG00000228082	RP1-121G13.2	NA	antisense	6	100874992	100885360	+
ENSG00000180424	DEFB123	NA	protein_coding	20	30028320	30038060	+
ENSG00000180422	LINC00304	NA	lincRNA	16	89225552	89230653	+
ENSG00000220256	AC093802.1	NA	protein_coding	2	240684552	240724577	+
ENSG00000103152	MPG	NA	protein_coding	16	127004	135852	+
ENSG00000254308	IGLVIV-59	NA	IG_V_pseudogene	22	22533616	22533867	+
ENSG00000103150	MLYCD	NA	protein_coding	16	83932729	83949787	+
ENSG00000103154	NECAB2	NA	protein_coding	16	84002235	84036381	+
ENSG00000151475	SLC25A31	NA	protein_coding	4	128651531	128695448	+
ENSG00000156127	BATF	NA	protein_coding	14	75988766	76013358	+
ENSG00000254224	KB-1043D8.6	NA	antisense	8	97247653	97250262	+
ENSG00000142515	KLK3	NA	protein_coding	19	51358169	51364020	+
ENSG00000142511	GPR32	NA	protein_coding	19	51273856	51274928	+
ENSG00000142513	ACPT	NA	protein_coding	19	51293670	51298481	+
ENSG00000221611	SNORD88	NA	snoRNA	12	13124985	13125077	+
ENSG00000221612	AC106775.1	NA	miRNA	5	136869141	136869210	+
ENSG00000229976	RP5-1031J8.1	NA	lincRNA	20	38414361	38441871	+
ENSG00000221614	MIR1185-2	NA	miRNA	14	101510533	101510620	+
ENSG00000221615	AC140132.1	NA	miRNA	5	21734318	21734413	+
ENSG00000221617	AC138123.1	NA	miRNA	12	93491025	93491120	+
ENSG00000221619	AC012671.3	NA	miRNA	2	88594109	88594198	+
ENSG00000163701	IL17RE	NA	protein_coding	3	9944301	9958086	+
ENSG00000055957	ITIH1	NA	protein_coding	3	52811601	52826078	+
ENSG00000229972	IQCF3	NA	protein_coding	3	51851618	51864876	+
ENSG00000267075	RP11-434D2.3	NA	lincRNA	17	20448682	20453265	+
ENSG00000267073	AC005256.1	NA	lincRNA	19	1748053	1748744	+
ENSG00000267070	RP11-10K17.6	NA	processed_transcript	16	5148738	5192596	+
ENSG00000267078	RP11-666A8.9	NA	antisense	17	74565872	74567322	+
ENSG00000263765	RP11-746B8.1	NA	antisense	18	30413415	30518280	+
ENSG00000263762	MIR4286	NA	miRNA	8	10524486	10524580	+
ENSG00000204963	PCDHA7	NA	protein_coding	5	140213967	140391929	+
ENSG00000201542	SNORA62	NA	snoRNA	1	35775873	35776026	+
ENSG00000253020	7SK	NA	misc_RNA	3	174349611	174349892	+
ENSG00000253027	SNORA70	NA	snoRNA	19	45268205	45268357	+
ENSG00000201544	SNORA16B	NA	snoRNA	1	212526156	212526292	+
ENSG00000259041	RP11-167B3.1	NA	lincRNA	15	98825302	98829136	+
ENSG00000132549	VPS13B	NA	protein_coding	8	100025492	100889808	+
ENSG00000051180	RAD51	NA	protein_coding	15	40986970	41024354	+
ENSG00000259049	RP11-589M4.1	NA	antisense	14	53241953	53244458	+
ENSG00000257912	RP11-248E9.5	NA	lincRNA	12	88189508	88195805	+
ENSG00000257913	RP11-386G11.5	NA	antisense	12	49392148	49412988	+
ENSG00000257910	RP11-461F16.3	NA	processed_transcript	12	77271971	77274132	+
ENSG00000205436	EXOC3L4	NA	protein_coding	14	103566479	103576896	+
ENSG00000205439	KRTAP12-3	NA	protein_coding	21	46077847	46078258	+
ENSG00000225913	RP11-57C13.6	NA	processed_transcript	10	89367740	89419036	+
ENSG00000225916	AC007879.4	NA	lincRNA	2	208091671	208093032	+
ENSG00000225915	RP3-511B24.5	NA	antisense	20	39809094	39825427	+
ENSG00000225914	XXbac-BPG154L12.4	NA	antisense	6	32223486	32233615	+
ENSG00000157456	CCNB2	NA	protein_coding	15	59397275	59417244	+
ENSG00000166289	PLEKHF1	NA	protein_coding	19	30155961	30166364	+
ENSG00000157450	RNF111	NA	protein_coding	15	59157372	59389618	+
ENSG00000108984	MAP2K6	NA	protein_coding	17	67410837	67539472	+
ENSG00000229021	AL591893.1	NA	processed_transcript	1	151967005	152015250	+
ENSG00000252973	U6	NA	snRNA	19	19343662	19343756	+
ENSG00000149527	PLCH2	NA	protein_coding	1	2398896	2436969	+
ENSG00000227519	CTA-342B11.1	NA	lincRNA	22	32359342	32366387	+
ENSG00000227518	MIR1302-11	NA	antisense	9	27655	30891	+
ENSG00000227517	AC003051.1	NA	lincRNA	17	67573390	67899141	+
ENSG00000227516	RP5-973N23.4	NA	lincRNA	6	41836358	41837469	+
ENSG00000227510	RP11-196P2.1	NA	lincRNA	13	61491174	61492139	+
ENSG00000227512	RP11-413M3.4	NA	antisense	9	139437331	139438287	+
ENSG00000127993	RBM48	NA	protein_coding	7	92158085	92167319	+
ENSG00000162078	ZG16B	NA	protein_coding	16	2880168	2888967	+
ENSG00000127995	CASD1	NA	protein_coding	7	94138529	94186331	+
ENSG00000162782	TDRD5	NA	protein_coding	1	179560746	179660407	+
ENSG00000227365	AC008060.5	NA	antisense	7	155302976	155311318	+
ENSG00000182111	ZNF716	NA	protein_coding	7	57509881	57533252	+
ENSG00000166750	SLFN5	NA	protein_coding	17	33570053	33600674	+
ENSG00000162073	PAQR4	NA	protein_coding	16	3019244	3023490	+
ENSG00000244666	Metazoa_SRP	NA	misc_RNA	15	72956894	72957171	+
ENSG00000157985	AGAP1	NA	protein_coding	2	236402731	237035198	+
ENSG00000254246	CTB-120L21.1	NA	antisense	5	156531797	156541911	+
ENSG00000254245	PCDHGA3	NA	protein_coding	5	140723599	140892546	+
ENSG00000143028	SYPL2	NA	protein_coding	1	110009178	110024759	+
ENSG00000167157	PRRX2	NA	protein_coding	9	132427918	132484875	+
ENSG00000178234	GALNT11	NA	protein_coding	7	151722776	151819425	+
ENSG00000242628	AC009228.1	NA	antisense	2	24437248	24444385	+
ENSG00000178233	TMEM151B	NA	protein_coding	6	44238201	44275243	+
ENSG00000242620	Metazoa_SRP	NA	misc_RNA	15	90837181	90837455	+
ENSG00000252375	AC099339.1	NA	miRNA	4	153822116	153822231	+
ENSG00000252376	RNA5SP395	NA	rRNA	15	50755576	50755695	+
ENSG00000252378	AC004851.1	NA	miRNA	7	73985675	73985754	+
ENSG00000251543	RP11-60A8.2	NA	lincRNA	5	72633731	72634360	+
ENSG00000251542	CTC-313D10.1	NA	lincRNA	5	113911736	113915667	+
ENSG00000251546	IGKV1D-39	NA	IG_V_gene	2	89901290	89901791	+
ENSG00000266844	RP11-862L9.3	NA	antisense	18	74686644	74696118	+
ENSG00000257261	RP11-96H19.1	NA	processed_transcript	12	46777460	46850051	+
ENSG00000252088	snoU13	NA	snoRNA	17	45298006	45298091	+
ENSG00000257264	MIR3179-1	NA	lincRNA	16	14995354	14996031	+
ENSG00000252082	U6	NA	snRNA	3	172420912	172421015	+
ENSG00000252080	U7	NA	snRNA	16	6798907	6798970	+
ENSG00000252087	7SK	NA	misc_RNA	4	91291272	91291578	+
ENSG00000252086	RNA5SP76	NA	rRNA	1	219935129	219935217	+
ENSG00000238906	snoU13	NA	snoRNA	7	29952142	29952248	+
ENSG00000228865	RP11-463P17.3	NA	antisense	10	48357924	48358600	+
ENSG00000256797	KLRF2	NA	protein_coding	12	10034086	10048432	+
ENSG00000228863	RP11-404F10.2	NA	antisense	1	160643134	160653698	+
ENSG00000245534	RP11-219B17.1	NA	antisense	15	60771375	60922836	+
ENSG00000245532	NEAT1	NA	lincRNA	11	65190243	65213011	+
ENSG00000101161	PRPF6	NA	protein_coding	20	62612486	62664453	+
ENSG00000101162	TUBB1	NA	protein_coding	20	57594307	57601709	+
ENSG00000175213	ZNF408	NA	protein_coding	11	46722366	46727462	+
ENSG00000231304	AC107622.1	NA	lincRNA	3	20383958	20392420	+
ENSG00000255680	RP11-732A19.9	NA	antisense	11	6640019	6640995	+
ENSG00000255681	AC084125.1	NA	pseudogene	8	145774889	145775057	+
ENSG00000255686	RP11-227B21.2	NA	antisense	12	117890815	117894791	+
ENSG00000255689	RP11-136I14.5	NA	lincRNA	11	115453013	115471057	+
ENSG00000230817	RP4-601K24.1	NA	lincRNA	1	83368864	83632498	+
ENSG00000170790	OR10A2	NA	protein_coding	11	6890922	6891976	+
ENSG00000170791	CHCHD7	NA	protein_coding	8	57124243	57131357	+
ENSG00000206105	KRTAP20-4	NA	protein_coding	21	31992944	31993169	+
ENSG00000197122	SRC	NA	protein_coding	20	35973086	36034453	+
ENSG00000197123	ZNF679	NA	protein_coding	7	63688850	63727309	+
ENSG00000256139	RP11-443D10.3	NA	processed_transcript	12	109549021	109563369	+
ENSG00000161835	GRASP	NA	protein_coding	12	52400722	52409671	+
ENSG00000199872	U6	NA	snRNA	2	26265542	26265650	+
ENSG00000199875	Y_RNA	NA	misc_RNA	11	93452767	93452881	+
ENSG00000207052	U6	NA	snRNA	5	32309766	32309874	+
ENSG00000207051	SNORA27	NA	snoRNA	13	27829536	27829663	+
ENSG00000207056	U1	NA	snRNA	1	7279418	7279584	+
ENSG00000255537	AP000708.1	NA	protein_coding	11	125365108	125369424	+
ENSG00000201846	RNA5SP166	NA	rRNA	4	149479097	149479200	+
ENSG00000201843	Y_RNA	NA	misc_RNA	9	136177951	136178046	+
ENSG00000006125	AP2B1	NA	protein_coding	17	33905063	34053436	+
ENSG00000121897	LIAS	NA	protein_coding	4	39460618	39479273	+
ENSG00000006128	TAC1	NA	protein_coding	7	97361218	97369784	+
ENSG00000203995	ZYG11A	NA	protein_coding	1	53308181	53360670	+
ENSG00000266780	MIR4444-1	NA	miRNA	3	75263625	75263700	+
ENSG00000198690	FAN1	NA	protein_coding	15	31196053	31235311	+
ENSG00000198692	EIF1AY	NA	protein_coding	Y	22737609	22755040	+
ENSG00000181135	ZNF707	NA	protein_coding	8	144766620	144777555	+
ENSG00000176746	MAGEB6	NA	protein_coding	X	26210555	26213763	+
ENSG00000203469	RP5-1113E3.3	NA	antisense	1	10518610	10519395	+
ENSG00000176749	CDK5R1	NA	protein_coding	17	30813635	30818274	+
ENSG00000163382	APOA1BP	NA	protein_coding	1	156561552	156564091	+
ENSG00000176293	ZNF135	NA	protein_coding	19	58570605	58581123	+
ENSG00000176294	OR4N2	NA	protein_coding	14	20187172	20296531	+
ENSG00000176299	OR4M1	NA	protein_coding	14	20248399	20249516	+
ENSG00000204508	PRAMEF22	NA	protein_coding	1	13035541	13038381	+
ENSG00000248709	CTC-505O3.2	NA	lincRNA	5	115091339	115091983	+
ENSG00000204501	PRAMEF9	NA	protein_coding	1	13421174	13428191	+
ENSG00000248701	CTC-493L21.2	NA	lincRNA	5	86093500	86096097	+
ENSG00000204502	PRAMEF5	NA	protein_coding	1	13359817	13369057	+
ENSG00000178796	RIIAD1	NA	protein_coding	1	151682907	151702082	+
ENSG00000240578	TRBV22-1	NA	TR_V_pseudogene	7	142349247	142349699	+
ENSG00000240571	RP11-775D22.3	NA	antisense	7	129813556	129845201	+
ENSG00000240573	RP11-354H21.2	NA	lincRNA	3	78136553	78141421	+
ENSG00000257048	RP11-476M19.2	NA	lincRNA	12	3476997	3480512	+
ENSG00000240577	Metazoa_SRP	NA	misc_RNA	10	5673424	5673716	+
ENSG00000241626	RP11-275A6.2	NA	lincRNA	1	74175049	74180897	+
ENSG00000241625	Metazoa_SRP	NA	misc_RNA	2	62718311	62718601	+
ENSG00000200084	SNORD68	NA	snoRNA	16	89627840	89627925	+
ENSG00000200085	Y_RNA	NA	misc_RNA	1	248192420	248192523	+
ENSG00000200087	SNORA73B	NA	snoRNA	1	28835069	28835274	+
ENSG00000200089	SNORD114-31	NA	snoRNA	14	101459571	101459647	+
ENSG00000206861	SNORD62B	NA	snoRNA	9	134365871	134365958	+
ENSG00000206867	U6	NA	snRNA	8	40890409	40890517	+
ENSG00000092621	PHGDH	NA	protein_coding	1	120254508	120286838	+
ENSG00000136383	ALPK3	NA	protein_coding	15	85359909	85416713	+
ENSG00000136381	IREB2	NA	protein_coding	15	78729771	78793798	+
ENSG00000132801	ZSWIM3	NA	protein_coding	20	44486254	44507761	+
ENSG00000237070	AC005550.3	NA	antisense	7	15707570	15721605	+
ENSG00000237076	RP5-836J3.1	NA	lincRNA	1	84255961	84267148	+
ENSG00000237074	RP11-6J21.2	NA	lincRNA	1	207422410	207482466	+
ENSG00000177169	ULK1	NA	protein_coding	12	132379194	132407695	+
ENSG00000172530	BANP	NA	protein_coding	16	87984040	88152028	+
ENSG00000173662	TAS1R1	NA	protein_coding	1	6615239	6639817	+
ENSG00000173660	UQCRH	NA	protein_coding	1	46769301	46782448	+
ENSG00000233796	AC089999.1	NA	pseudogene	12	113596554	113596917	+
ENSG00000136653	RASSF5	NA	protein_coding	1	206680877	206762607	+
ENSG00000207738	MIR520C	NA	miRNA	19	54210705	54210793	+
ENSG00000207737	MIR181B2	NA	miRNA	9	127455987	127456077	+
ENSG00000207735	MIR520D	NA	miRNA	19	54223348	54223436	+
ENSG00000207734	MIR517A	NA	miRNA	19	54215520	54215608	+
ENSG00000207732	MIR218-1	NA	miRNA	4	20529896	20530007	+
ENSG00000207730	MIR200B	NA	miRNA	1	1102482	1102578	+
ENSG00000113303	BTNL8	NA	protein_coding	5	180326075	180377906	+
ENSG00000113300	CNOT6	NA	protein_coding	5	179921415	180005405	+
ENSG00000236677	AP000688.11	NA	antisense	21	37432728	37436706	+
ENSG00000073282	TP63	NA	protein_coding	3	189349214	189615068	+
ENSG00000236678	LINC00347	NA	lincRNA	13	75126978	75130021	+
ENSG00000201061	RN7SKP4	NA	misc_RNA	13	45697226	45697549	+
ENSG00000201066	7SK	NA	misc_RNA	7	154973589	154973894	+
ENSG00000070886	EPHA8	NA	protein_coding	1	22890055	22930087	+
ENSG00000224578	CTD-2119F7.2	NA	pseudogene	16	51679667	51680723	+
ENSG00000224577	AC017048.4	NA	lincRNA	2	177502436	177520686	+
ENSG00000264118	Metazoa_SRP	NA	misc_RNA	5	23201552	23201836	+
ENSG00000264113	Metazoa_SRP	NA	misc_RNA	17	4786268	4786591	+
ENSG00000264116	RP11-321M21.3	NA	protein_coding	18	73118965	73130969	+
ENSG00000145982	FARS2	NA	protein_coding	6	5261582	5771816	+
ENSG00000265295	AC084125.3	NA	miRNA	8	145792689	145792776	+
ENSG00000235321	AC007556.3	NA	antisense	2	169957251	169957720	+
ENSG00000235326	RP11-509J21.3	NA	lincRNA	9	3674544	3691814	+
ENSG00000100918	REC8	NA	protein_coding	14	24641060	24649463	+
ENSG00000252944	U6	NA	snRNA	6	105214695	105214801	+
ENSG00000117152	RGS4	NA	protein_coding	1	163038563	163046592	+
ENSG00000117154	IGSF21	NA	protein_coding	1	18434238	18704976	+
ENSG00000187800	PEAR1	NA	protein_coding	1	156863510	156886226	+
ENSG00000139973	SYT16	NA	protein_coding	14	62453801	62568424	+
ENSG00000171984	C20orf196	NA	protein_coding	20	5731037	5844558	+
ENSG00000265644	RP11-451L19.1	NA	lincRNA	18	76240547	76244867	+
ENSG00000012174	MBTPS2	NA	protein_coding	X	21857752	21903542	+
ENSG00000171989	LDHAL6B	NA	protein_coding	15	59499040	59500705	+
ENSG00000265648	Metazoa_SRP	NA	misc_RNA	16	70309970	70310251	+
ENSG00000103319	EEF2K	NA	protein_coding	16	22217601	22297954	+
ENSG00000083812	ZNF324	NA	protein_coding	19	58978461	58984781	+
ENSG00000233835	RP1-92C4.2	NA	lincRNA	6	80581588	80584327	+
ENSG00000175155	YPEL2	NA	protein_coding	17	57409061	57479090	+
ENSG00000265393	CTD-2517M22.17	NA	antisense	8	145737948	145739056	+
ENSG00000139354	GAS2L3	NA	protein_coding	12	100967459	101018697	+
ENSG00000265399	RP13-270P17.2	NA	processed_transcript	18	3190393	3247275	+
ENSG00000230918	AC008063.2	NA	antisense	2	162929764	162931679	+
ENSG00000064601	CTSA	NA	protein_coding	20	44519589	44527459	+
ENSG00000143919	CAMKMT	NA	protein_coding	2	44589087	44999731	+
ENSG00000111218	PRMT8	NA	protein_coding	12	3490513	3703139	+
ENSG00000263566	AC096753.2	NA	miRNA	2	80021394	80021507	+
ENSG00000263567	RP11-805L22.3	NA	lincRNA	17	30089457	30096067	+
ENSG00000263561	MIR4704	NA	miRNA	13	66792380	66792456	+
ENSG00000263563	UBBP4	NA	protein_coding	17	21729599	21731762	+
ENSG00000263569	Metazoa_SRP	NA	misc_RNA	7	75918106	75918371	+
ENSG00000213953	AC018867.2	NA	protein_coding	2	187361838	187365393	+
ENSG00000109610	SOD3	NA	protein_coding	4	24797083	24802464	+
ENSG00000220981	AL391384.1	NA	miRNA	13	73425224	73425307	+
ENSG00000220986	SNORA50	NA	snoRNA	5	68456631	68456766	+
ENSG00000220984	AC025674.1	NA	miRNA	8	58096191	58096279	+
ENSG00000118271	TTR	NA	protein_coding	18	29171687	29178974	+
ENSG00000149328	GLB1L2	NA	protein_coding	11	134201766	134248235	+
ENSG00000219626	FAM228B	NA	protein_coding	2	24346348	24392506	+
ENSG00000221050	AC091304.1	NA	miRNA	15	28633513	28633597	+
ENSG00000221051	AC118344.1	NA	miRNA	19	40710017	40710106	+
ENSG00000264937	AC100830.5	NA	antisense	15	64988819	64989060	+
ENSG00000264935	AC009035.1	NA	miRNA	16	26747548	26747638	+
ENSG00000184363	PKP3	NA	protein_coding	11	392612	404908	+
ENSG00000152910	CNTNAP4	NA	protein_coding	16	76311174	76593128	+
ENSG00000238854	SNORD5	NA	snoRNA	8	142457573	142457649	+
ENSG00000238855	snoU13	NA	snoRNA	11	126151550	126151649	+
ENSG00000238856	snoU13	NA	snoRNA	1	224524491	224524591	+
ENSG00000238859	snoU13	NA	snoRNA	1	171451044	171451148	+
ENSG00000127511	SIN3B	NA	protein_coding	19	16940216	16991164	+
ENSG00000242428	RP11-147N17.1	NA	antisense	3	58810161	59004819	+
ENSG00000133477	FAM83F	NA	protein_coding	22	40390951	40426043	+
ENSG00000227066	RP3-340N1.2	NA	antisense	1	20480829	20487061	+
ENSG00000227061	AC079779.7	NA	antisense	2	197567	202605	+
ENSG00000242421	Metazoa_SRP	NA	misc_RNA	2	97766319	97766609	+
ENSG00000248517	RP11-386B13.4	NA	lincRNA	4	185910149	185926340	+
ENSG00000172273	HINFP	NA	protein_coding	11	118992295	119006752	+
ENSG00000172270	BSG	NA	protein_coding	19	571295	583493	+
ENSG00000186377	CYP4X1	NA	protein_coding	1	47427034	47516423	+
ENSG00000223989	RP11-84A14.5	NA	antisense	1	9908374	9910212	+
ENSG00000208308	SNORA40	NA	snoRNA	2	135894196	135894325	+
ENSG00000259536	RP11-111A22.1	NA	antisense	15	40780238	40850183	+
ENSG00000259534	RP11-522B15.7	NA	processed_transcript	15	96992070	96992979	+
ENSG00000259532	RP11-138H8.2	NA	lincRNA	15	71041269	71046516	+
ENSG00000115446	UNC50	NA	protein_coding	2	99225040	99234978	+
ENSG00000259530	RP11-259A24.1	NA	lincRNA	15	61890711	61897440	+
ENSG00000255418	RP11-266A24.1	NA	lincRNA	11	23186444	23224707	+
ENSG00000242391	RP4-631H13.2	NA	processed_transcript	1	53346886	53347402	+
ENSG00000242396	RP11-67L3.5	NA	antisense	1	55352546	55353674	+
ENSG00000207390	Y_RNA	NA	misc_RNA	17	4096061	4096160	+
ENSG00000113845	TIMMDC1	NA	protein_coding	3	119217377	119243937	+
ENSG00000108255	CRYBA1	NA	protein_coding	17	27573879	27581501	+
ENSG00000199959	SNORA2	NA	snoRNA	1	84743002	84743140	+
ENSG00000223365	PROX1-IT1	NA	sense_intronic	1	214167444	214168426	+
ENSG00000223360	AC096559.2	NA	lincRNA	2	12739111	12745271	+
ENSG00000260136	CTD-2270L9.4	NA	lincRNA	16	23464077	23468927	+
ENSG00000260137	RP11-258F22.2	NA	lincRNA	10	38080506	38080865	+
ENSG00000260132	LA16c-312E8.2	NA	antisense	16	1458833	1462249	+
ENSG00000153291	SLC25A27	NA	protein_coding	6	46620676	46649356	+
ENSG00000260131	RP11-264J4.9	NA	antisense	13	20755668	20756081	+
ENSG00000196456	ZNF775	NA	protein_coding	7	150065877	150095719	+
ENSG00000125207	PIWIL1	NA	protein_coding	12	130822430	130857182	+
ENSG00000124151	NCOA3	NA	protein_coding	20	46130599	46285621	+
ENSG00000104880	ARHGEF18	NA	protein_coding	19	7459997	7537370	+
ENSG00000124155	PIGT	NA	protein_coding	20	44044705	44054884	+
ENSG00000124157	SEMG2	NA	protein_coding	20	43849939	43853099	+
ENSG00000226859	RP11-48F14.2	NA	lincRNA	3	186194514	186196159	+
ENSG00000226853	AC010894.3	NA	lincRNA	2	175352115	175353028	+
ENSG00000226852	RP1-212P9.2	NA	lincRNA	1	29194085	29197779	+
ENSG00000236537	RP11-732M18.3	NA	lincRNA	6	158703293	158733390	+
ENSG00000226854	RP11-212D3.4	NA	lincRNA	X	75122938	75124693	+
ENSG00000140030	GPR65	NA	protein_coding	14	88471466	88478419	+
ENSG00000076513	ANKRD13A	NA	protein_coding	12	110437326	110477568	+
ENSG00000185056	C5orf47	NA	protein_coding	5	173416160	173433143	+
ENSG00000185052	SLC24A3	NA	protein_coding	20	19193288	19703545	+
ENSG00000152284	TCF7L1	NA	protein_coding	2	85360531	85537511	+
ENSG00000151532	VTI1A	NA	protein_coding	10	114207014	114578503	+
ENSG00000246898	CTD-2258A20.4	NA	lincRNA	16	66442425	66446038	+
ENSG00000127362	TAS2R3	NA	protein_coding	7	141463895	141464997	+
ENSG00000152133	CCDC75	NA	protein_coding	2	37311592	37326387	+
ENSG00000152137	HSPB8	NA	protein_coding	12	119616445	119658936	+
ENSG00000102908	NFAT5	NA	protein_coding	16	69598995	69738569	+
ENSG00000102900	NUP93	NA	protein_coding	16	56764015	56878797	+
ENSG00000102904	TSNAXIP1	NA	protein_coding	16	67840666	67861971	+
ENSG00000106484	MEST	NA	protein_coding	7	130126044	130146133	+
ENSG00000018236	CNTN1	NA	protein_coding	12	41086242	41465772	+
ENSG00000225037	EIF1AX-AS1	NA	antisense	X	20158084	20158562	+
ENSG00000225032	RP11-228B15.4	NA	antisense	9	130578343	130584799	+
ENSG00000178802	MPI	NA	protein_coding	15	75182344	75191798	+
ENSG00000227896	RP11-77P6.2	NA	antisense	10	88281700	88282443	+
ENSG00000252948	U6	NA	snRNA	Y	28507134	28507239	+
ENSG00000227893	LINC00352	NA	lincRNA	13	24072933	24077013	+
ENSG00000252947	SCARNA1	NA	snoRNA	1	28160910	28161077	+
ENSG00000178809	TRIM73	NA	protein_coding	7	75024335	75040279	+
ENSG00000252943	U6	NA	snRNA	9	19073839	19073944	+
ENSG00000252940	AL357936.1	NA	miRNA	9	124302153	124302241	+
ENSG00000212278	SNORD81	NA	snoRNA	5	18236230	18236305	+
ENSG00000185942	NKAIN3	NA	protein_coding	8	63161499	63912211	+
ENSG00000185940	KRTAP5-5	NA	protein_coding	11	1651031	1652160	+
ENSG00000185947	ZNF267	NA	protein_coding	16	31885077	31928668	+
ENSG00000185946	RNPC3	NA	protein_coding	1	104068311	104097854	+
ENSG00000200530	SNORD35B	NA	snoRNA	19	50000975	50001063	+
ENSG00000200534	SNORA33	NA	snoRNA	6	133138356	133138487	+
ENSG00000200536	SNORA25	NA	snoRNA	1	110815104	110815229	+
ENSG00000200537	RNY4P6	NA	misc_RNA	11	116886611	116886708	+
ENSG00000204624	PTCHD2	NA	protein_coding	1	11539293	11597641	+
ENSG00000204625	HCG9	NA	lincRNA	6	29942887	29946183	+
ENSG00000153666	GOLGA8IP	NA	protein_coding	15	23255240	23268823	+
ENSG00000136238	RAC1	NA	protein_coding	7	6414152	6443608	+
ENSG00000114455	HHLA2	NA	protein_coding	3	108015374	108097132	+
ENSG00000166428	PLD4	NA	protein_coding	14	105391151	105399574	+
ENSG00000204196	AC011737.2	NA	pseudogene	2	204055501	204056000	+
ENSG00000204195	AWAT1	NA	protein_coding	X	69454503	69460477	+
ENSG00000162300	ZFPL1	NA	protein_coding	11	64851693	64855870	+
ENSG00000247853	RP5-940J5.6	NA	antisense	12	6687786	6693905	+
ENSG00000228543	GS1-519E5.1	NA	lincRNA	X	9217958	9243246	+
ENSG00000228541	AC093159.1	NA	lincRNA	2	62690260	62691205	+
ENSG00000238591	snoU13	NA	snoRNA	21	17080976	17081077	+
ENSG00000228549	RP11-108M9.3	NA	lincRNA	1	17197438	17200587	+
ENSG00000228548	ITPKB-AS1	NA	antisense	1	226856596	226864046	+
ENSG00000233803	TSPY4	NA	protein_coding	Y	9175071	9177887	+
ENSG00000233800	RP11-295G24.4	NA	sense_intronic	9	135822454	135826943	+
ENSG00000011083	SLC6A7	NA	protein_coding	5	149569518	149602351	+
ENSG00000226078	RP11-205K6.2	NA	lincRNA	9	129289895	129292622	+
ENSG00000201666	SNORD74	NA	snoRNA	X	28942184	28942255	+
ENSG00000201662	RNU6-60	NA	snRNA	13	49562049	49562153	+
ENSG00000201660	SNORA20	NA	snoRNA	X	5328161	5328292	+
ENSG00000183475	ASB7	NA	protein_coding	15	101142737	101191910	+
ENSG00000183474	GTF2H2C	NA	protein_coding	5	68856033	68889594	+
ENSG00000163516	ANKZF1	NA	protein_coding	2	220094477	220101391	+
ENSG00000183476	SH2D7	NA	protein_coding	15	78370148	78397251	+
ENSG00000183470	AC009365.3	NA	protein_coding	7	132333551	132413528	+
ENSG00000205572	SERF1B	NA	protein_coding	5	69321072	69338940	+
ENSG00000205571	SMN2	NA	protein_coding	5	69345348	69373421	+
ENSG00000143198	MGST3	NA	protein_coding	1	165600096	165631033	+
ENSG00000264553	MIR4257	NA	miRNA	1	150524403	150524490	+
ENSG00000156234	CXCL13	NA	protein_coding	4	78432905	78532988	+
ENSG00000254456	RP11-405K6.1	NA	lincRNA	11	25756315	25803305	+
ENSG00000254451	RP11-560G2.1	NA	antisense	12	75628518	75692288	+
ENSG00000254458	RP11-867G23.13	NA	antisense	11	66080322	66086708	+
ENSG00000169760	NLGN1	NA	protein_coding	3	173114072	174004434	+
ENSG00000143190	POU2F1	NA	protein_coding	1	167190064	167396582	+
ENSG00000267638	RP11-546M21.6	NA	processed_transcript	17	42193278	42197963	+
ENSG00000008394	MGST1	NA	protein_coding	12	16500074	16530126	+
ENSG00000227308	AC009502.4	NA	processed_transcript	2	220551707	220579408	+
ENSG00000242989	Metazoa_SRP	NA	misc_RNA	6	15113197	15113450	+
ENSG00000227305	RP11-340I6.3	NA	processed_transcript	7	62854164	62882424	+
ENSG00000242985	Metazoa_SRP	NA	misc_RNA	18	8471827	8472124	+
ENSG00000227301	RP11-384P7.5	NA	lincRNA	9	33719686	33722553	+
ENSG00000227303	GS1-256O22.5	NA	processed_transcript	X	142372752	142604631	+
ENSG00000155622	XAGE2B	NA	protein_coding	X	52112171	52118823	+
ENSG00000155621	C9orf85	NA	protein_coding	9	74526459	74598166	+
ENSG00000182700	IGIP	NA	protein_coding	5	139505519	139508391	+
ENSG00000225420	AC104134.2	NA	antisense	2	88838236	88875128	+
ENSG00000196159	FAT4	NA	protein_coding	4	126237552	126414087	+
ENSG00000196155	PLEKHG4	NA	protein_coding	16	67311411	67323402	+
ENSG00000196152	ZNF79	NA	protein_coding	9	130186659	130207651	+
ENSG00000225425	RP11-409K20.8	NA	antisense	9	132677196	132677894	+
ENSG00000225424	RP11-168C9.1	NA	lincRNA	10	131076513	131089986	+
ENSG00000120594	PLXDC2	NA	protein_coding	10	20105166	20569286	+
ENSG00000252123	RNU7-72P	NA	snRNA	20	48444527	48444590	+
ENSG00000252125	U6	NA	snRNA	6	107454273	107454374	+
ENSG00000252126	U6	NA	snRNA	7	65809289	65809401	+
ENSG00000252129	SNORA74	NA	snoRNA	17	15477331	15477512	+
ENSG00000223125	U2	NA	snRNA	17	39624206	39624398	+
ENSG00000175398	OR10P1	NA	protein_coding	12	56030642	56031638	+
ENSG00000222054	RNA5SP177	NA	rRNA	5	9761017	9761125	+
ENSG00000241983	Metazoa_SRP	NA	misc_RNA	19	39859791	39860086	+
ENSG00000229590	MSX2P1	NA	pseudogene	17	56234807	56234926	+
ENSG00000198089	SFI1	NA	protein_coding	22	31892259	32014572	+
ENSG00000134882	UBAC2	NA	protein_coding	13	99853026	100038681	+
ENSG00000198087	CD2AP	NA	protein_coding	6	47445523	47594999	+
ENSG00000198083	KRTAP9-9	NA	protein_coding	17	39411634	39412616	+
ENSG00000231518	RP11-327L3.3	NA	antisense	9	35930007	35937148	+
ENSG00000199934	SNORD81	NA	snoRNA	1	86057961	86058039	+
ENSG00000199933	Y_RNA	NA	misc_RNA	12	102113584	102113696	+
ENSG00000199932	RNU1-18P	NA	snRNA	6	122532792	122532957	+
ENSG00000207159	SNORD116-22	NA	snoRNA	15	25335068	25335161	+
ENSG00000207152	SNORA67	NA	snoRNA	17	7481271	7481409	+
ENSG00000198336	MYL4	NA	protein_coding	17	45286399	45301045	+
ENSG00000198331	HYLS1	NA	protein_coding	11	125753507	125770543	+
ENSG00000221504	AC011456.1	NA	miRNA	19	32417477	32417594	+
ENSG00000198339	HIST1H4I	NA	protein_coding	6	27107074	27108418	+
ENSG00000160796	NBEAL2	NA	protein_coding	3	47021171	47051193	+
ENSG00000160791	CCR5	NA	protein_coding	3	46411631	46417697	+
ENSG00000198390	KRTAP13-1	NA	protein_coding	21	31768390	31769136	+
ENSG00000175877	WBSCR28	NA	protein_coding	7	73275487	73280223	+
ENSG00000243295	CTD-2185K10.1	NA	lincRNA	3	59050874	59105235	+
ENSG00000168040	FADD	NA	protein_coding	11	70049267	70053496	+
ENSG00000214614	RP11-989E6.3	NA	lincRNA	16	32896513	32900195	+
ENSG00000249867	RP11-115J23.1	NA	lincRNA	11	28724160	29085368	+
ENSG00000249861	LGALS16	NA	protein_coding	19	40146556	40151287	+
ENSG00000249860	MTRNR2L5	NA	protein_coding	10	57358748	57360488	+
ENSG00000230649	AC024084.1	NA	lincRNA	7	135710507	135769416	+
ENSG00000230641	USP12-AS2	NA	antisense	13	27746394	27757135	+
ENSG00000230645	AC016682.1	NA	lincRNA	2	151027935	151157594	+
ENSG00000230647	AC022816.2	NA	lincRNA	17	14277454	14324343	+
ENSG00000036473	OTC	NA	protein_coding	X	38211796	38280703	+
ENSG00000133275	CSNK1G2	NA	protein_coding	19	1941186	1981337	+
ENSG00000188488	SERPINA5	NA	protein_coding	14	95027777	95059457	+
ENSG00000148308	GTF3C5	NA	protein_coding	9	135906074	135933888	+
ENSG00000135829	DHX9	NA	protein_coding	1	182808502	182856886	+
ENSG00000248115	RP11-752D24.2	NA	antisense	4	53811814	53824254	+
ENSG00000249249	AC010226.4	NA	antisense	5	114937752	114956356	+
ENSG00000249241	AC195454.1	NA	lincRNA	4	40318500	40332436	+
ENSG00000249240	AC069368.3	NA	protein_coding	15	65134145	65223118	+
ENSG00000162769	FLVCR1	NA	protein_coding	1	213031595	213072705	+
ENSG00000265867	MIR4516	NA	miRNA	16	2183118	2183205	+
ENSG00000265864	AC092117.2	NA	miRNA	16	2819871	2819950	+
ENSG00000265860	Metazoa_SRP	NA	misc_RNA	2	101710029	101710285	+
ENSG00000200275	RNA5SP199	NA	rRNA	5	155272445	155272538	+
ENSG00000173253	DMRT2	NA	protein_coding	9	1050352	1057552	+
ENSG00000233342	RP11-235G24.3	NA	lincRNA	6	161347399	161348194	+
ENSG00000173258	ZNF483	NA	protein_coding	9	114287437	114340124	+
ENSG00000233349	LINC00333	NA	lincRNA	13	85136497	85137371	+
ENSG00000116161	CACYBP	NA	protein_coding	1	174968298	174980851	+
ENSG00000258979	RP11-433J8.2	NA	lincRNA	14	97207526	97256950	+
ENSG00000223164	AL445384.1	NA	miRNA	14	28459209	28459321	+
ENSG00000223162	RNA5SP280	NA	rRNA	9	27198283	27198399	+
ENSG00000243854	Metazoa_SRP	NA	misc_RNA	12	19456412	19456710	+
ENSG00000236737	GAGE12B	NA	protein_coding	X	49294470	49294588	+
ENSG00000207128	U6	NA	snRNA	8	10333731	10333839	+
ENSG00000105369	CD79A	NA	protein_coding	19	42381188	42385439	+
ENSG00000232434	C9orf172	NA	protein_coding	9	139738865	139741797	+
ENSG00000232436	RP11-103C3.1	NA	lincRNA	1	221681899	221684321	+
ENSG00000235426	RP11-342M3.5	NA	antisense	10	81142082	81169030	+
ENSG00000234777	RP11-125D12.2	NA	lincRNA	6	159804561	159817475	+
ENSG00000234779	RP11-62F24.2	NA	antisense	9	16726810	16727522	+
ENSG00000184489	PTP4A3	NA	protein_coding	8	142402091	142441620	+
ENSG00000117691	NENF	NA	protein_coding	1	212606227	212619714	+
ENSG00000236883	AP001615.9	NA	antisense	21	43159531	43161468	+
ENSG00000236882	C5orf27	NA	protein_coding	5	95187934	95195837	+
ENSG00000236886	AC007563.5	NA	processed_transcript	2	217559185	217858722	+
ENSG00000145536	ADAMTS16	NA	protein_coding	5	5140441	5320417	+
ENSG00000264099	MIR4803	NA	miRNA	5	71465292	71465367	+
ENSG00000264098	CTD-2350C19.1	NA	antisense	17	26729126	26731067	+
ENSG00000264090	MIR4666B	NA	miRNA	X	29592393	29592475	+
ENSG00000170935	NCBP2L	NA	protein_coding	X	107037449	107037912	+
ENSG00000086544	ITPKC	NA	protein_coding	19	41223006	41246763	+
ENSG00000076067	RBMS2	NA	protein_coding	12	56915711	56984745	+
ENSG00000086548	CEACAM6	NA	protein_coding	19	42259327	42276113	+
ENSG00000167283	ATP5L	NA	protein_coding	11	118271867	118302211	+
ENSG00000224307	RP11-344B5.2	NA	lincRNA	9	132044735	132048007	+
ENSG00000235284	SNORD62A	NA	sense_intronic	9	134361050	134361137	+
ENSG00000235281	RP11-526P5.2	NA	lincRNA	10	2543973	2609431	+
ENSG00000261578	RP11-21L23.2	NA	sense_overlapping	11	76511406	76515599	+
ENSG00000156427	FGF18	NA	protein_coding	5	170846658	170884627	+
ENSG00000012779	ALOX5	NA	protein_coding	10	45869659	45941561	+
ENSG00000156395	SORCS3	NA	protein_coding	10	106400857	107024993	+
ENSG00000156398	SFXN2	NA	protein_coding	10	104474295	104498951	+
ENSG00000211637	IGLV4-69	NA	IG_V_gene	22	22385330	22385870	+
ENSG00000233858	AC026904.1	NA	lincRNA	8	49502959	49700220	+
ENSG00000234482	RP11-433J22.2	NA	antisense	1	147229424	147230517	+
ENSG00000234481	RP4-614N24.1	NA	antisense	1	37238739	37241369	+
ENSG00000234484	RP1-55C23.7	NA	antisense	6	133073812	133075090	+
ENSG00000211633	IGKV1D-42	NA	IG_V_gene	2	90229043	90229531	+
ENSG00000265809	AC007114.1	NA	miRNA	17	55080342	55080444	+
ENSG00000181626	ANKRD62	NA	protein_coding	18	12093846	12129748	+
ENSG00000181625	SLX1B	NA	protein_coding	16	29465820	29469540	+
ENSG00000110375	UPK2	NA	protein_coding	11	118827024	118829269	+
ENSG00000134690	CDCA8	NA	protein_coding	1	38158088	38175391	+
ENSG00000168743	NPNT	NA	protein_coding	4	106815930	106925184	+
ENSG00000226198	RP11-69D4.5	NA	antisense	10	5033748	5034174	+
ENSG00000134698	EIF2C4	NA	protein_coding	1	36273771	36323491	+
ENSG00000265056	MIR548S	NA	miRNA	2	11907568	11907651	+
ENSG00000265057	MIR4765	NA	miRNA	2	32860320	32860398	+
ENSG00000265054	AC090051.1	NA	miRNA	12	105345536	105345624	+
ENSG00000265052	Metazoa_SRP	NA	misc_RNA	17	65973812	65974084	+
ENSG00000265053	Metazoa_SRP	NA	misc_RNA	3	48421322	48421620	+
ENSG00000262003	RP11-676J12.7	NA	protein_coding	17	812870	814452	+
ENSG00000260719	AC009133.17	NA	antisense	16	29756566	29759620	+
ENSG00000260715	RP11-744D14.2	NA	lincRNA	16	64189071	64190478	+
ENSG00000215201	AP000269.1	NA	pseudogene	21	33826000	33830768	+
ENSG00000215203	GRXCR1	NA	protein_coding	4	42895282	43032675	+
ENSG00000215206	TRBV24OR9-2	NA	TR_V_pseudogene	9	33649043	33649612	+
ENSG00000251652	RP11-20I20.2	NA	antisense	4	1107425	1126765	+
ENSG00000143891	GALM	NA	protein_coding	2	38893050	38968379	+
ENSG00000071246	VASH1	NA	protein_coding	14	77228530	77249354	+
ENSG00000071243	ING3	NA	protein_coding	7	120590801	120617270	+
ENSG00000105926	MPP6	NA	protein_coding	7	24612885	24729159	+
ENSG00000132669	RIN2	NA	protein_coding	20	19867163	19983101	+
ENSG00000132664	POLR3F	NA	protein_coding	20	18447769	18465287	+
ENSG00000179615	OR2AP1	NA	protein_coding	12	55968197	55969128	+
ENSG00000226277	AC105393.2	NA	lincRNA	2	421055	422303	+
ENSG00000132661	NXT1	NA	protein_coding	20	23331371	23335414	+
ENSG00000266655	MIR3908	NA	miRNA	12	124020954	124021081	+
ENSG00000266654	RP11-1376P16.1	NA	antisense	17	80117930	80118328	+
ENSG00000266657	AL583842.8	NA	miRNA	1	142653523	142653607	+
ENSG00000266650	AL357519.2	NA	miRNA	6	113924115	113924227	+
ENSG00000266652	AC107025.1	NA	miRNA	3	84545725	84545814	+
ENSG00000119599	DCAF4	NA	protein_coding	14	73393038	73426411	+
ENSG00000222978	Y_RNA	NA	misc_RNA	12	7999882	7999978	+
ENSG00000222979	7SK	NA	misc_RNA	10	123170428	123170714	+
ENSG00000148840	PPRC1	NA	protein_coding	10	103892785	103910082	+
ENSG00000148843	PDCD11	NA	protein_coding	10	105156403	105206049	+
ENSG00000148842	CNNM2	NA	protein_coding	10	104678069	104838344	+
ENSG00000222971	RNA5SP222	NA	rRNA	6	146661554	146661660	+
ENSG00000222972	U6	NA	snRNA	2	202511437	202511543	+
ENSG00000222974	7SK	NA	misc_RNA	7	12916307	12916571	+
ENSG00000222976	7SK	NA	misc_RNA	17	55866808	55867093	+
ENSG00000139675	HNRNPA1L2	NA	protein_coding	13	53191603	53217919	+
ENSG00000162624	LHX8	NA	protein_coding	1	75594117	75627218	+
ENSG00000162627	SNX7	NA	protein_coding	1	99127234	99226056	+
ENSG00000162623	TYW3	NA	protein_coding	1	75198834	75232358	+
ENSG00000254707	RP11-35J10.4	NA	antisense	11	7726833	7731064	+
ENSG00000188707	C7orf29	NA	protein_coding	7	150026936	150029808	+
ENSG00000177042	TMEM80	NA	protein_coding	11	695614	705028	+
ENSG00000185630	PBX1	NA	protein_coding	1	164528642	164854300	+
ENSG00000165072	MAMDC2	NA	protein_coding	9	72658495	72841886	+
ENSG00000101350	KIF3B	NA	protein_coding	20	30865465	30922814	+
ENSG00000169902	TPST1	NA	protein_coding	7	65670184	65825430	+
ENSG00000169906	S100G	NA	protein_coding	X	16668279	16672793	+
ENSG00000250754	RP11-386B13.3	NA	processed_transcript	4	185973048	186028402	+
ENSG00000187688	TRPV2	NA	protein_coding	17	16318854	16340317	+
ENSG00000187689	AMTN	NA	protein_coding	4	71384255	71398459	+
ENSG00000263065	AF001548.6	NA	antisense	16	15835006	15835648	+
ENSG00000180438	TPRXL	NA	protein_coding	3	13978754	14107479	+
ENSG00000258699	RP11-356K23.2	NA	processed_transcript	14	89821402	89822915	+
ENSG00000267527	AC004790.3	NA	lincRNA	19	16130529	16131643	+
ENSG00000267520	RP11-373L24.1	NA	lincRNA	2	61153042	61155287	+
ENSG00000267522	CTD-2621I17.6	NA	lincRNA	19	56578048	56590167	+
ENSG00000258690	RP11-81F13.1	NA	antisense	14	37257847	37276368	+
ENSG00000258691	RP11-404P21.8	NA	protein_coding	14	96671179	96730266	+
ENSG00000267528	AC011524.1	NA	lincRNA	19	29374335	29444152	+
ENSG00000258695	RP3-414A15.2	NA	antisense	14	73989580	73997314	+
ENSG00000258697	DUX4L6	NA	protein_coding	4	190995378	190997180	+
ENSG00000218328	C1orf196	NA	protein_coding	1	14219050	14507087	+
ENSG00000196796	CTB-134H23.2	NA	protein_coding	16	29049921	29064047	+
ENSG00000179761	PIPOX	NA	protein_coding	17	27369916	27384234	+
ENSG00000164306	CCDC111	NA	protein_coding	4	185570765	185616117	+
ENSG00000164308	ERAP2	NA	protein_coding	5	96211641	96255420	+
ENSG00000164309	CMYA5	NA	protein_coding	5	78985698	79096045	+
ENSG00000100403	ZC3H7B	NA	protein_coding	22	41697524	41756151	+
ENSG00000104381	GDAP1	NA	protein_coding	8	75262615	75279111	+
ENSG00000104388	RAB2A	NA	protein_coding	8	61429414	61536186	+
ENSG00000125430	HS3ST3B1	NA	protein_coding	17	14204398	14252721	+
ENSG00000203896	LIME1	NA	protein_coding	20	62367633	62370456	+
ENSG00000203897	RP11-475E11.5	NA	antisense	1	109399837	109401146	+
ENSG00000182621	PLCB1	NA	protein_coding	20	8112822	8865547	+
ENSG00000209645	SNORD105	NA	snoRNA	19	10218325	10218411	+
ENSG00000256349	CTD-3074O7.11	NA	protein_coding	11	66276548	66301084	+
ENSG00000262820	RP11-615I2.7	NA	3prime_overlapping_ncrna	16	68595962	68601032	+
ENSG00000256342	RP3-446N13.1	NA	lincRNA	12	126580536	126588481	+
ENSG00000256343	RP11-662M24.1	NA	lincRNA	12	131142716	131153778	+
ENSG00000254852	RP11-719K4.2	NA	protein_coding	16	14841921	14859270	+
ENSG00000156136	DCK	NA	protein_coding	4	71858253	71896631	+
ENSG00000254854	CTD-2523D13.2	NA	antisense	11	119600291	119610333	+
ENSG00000254858	MPV17L2	NA	protein_coding	19	18304040	18307552	+
ENSG00000104960	PTOV1	NA	protein_coding	19	50354136	50363990	+
ENSG00000228363	AC015971.2	NA	antisense	2	86789196	86845889	+
ENSG00000228361	RP11-503C24.3	NA	lincRNA	6	168630410	168641395	+
ENSG00000228365	RP1-90J20.2	NA	lincRNA	6	2917126	2917967	+
ENSG00000239265	CLRN1-AS1	NA	antisense	3	150570269	150798513	+
ENSG00000228369	RP11-91A18.5	NA	antisense	1	52516588	52518355	+
ENSG00000036448	MYOM2	NA	protein_coding	8	1993153	2093380	+
ENSG00000180919	OR56B4	NA	protein_coding	11	6128912	6130065	+
ENSG00000180913	AC111177.1	NA	protein_coding	11	6149838	6150706	+
ENSG00000169885	CALML6	NA	protein_coding	1	1846264	1848733	+
ENSG00000196553	LINC00238	NA	lincRNA	14	66953070	66965271	+
ENSG00000202411	RNA5SP259	NA	rRNA	8	28387926	28388036	+
ENSG00000202410	Y_RNA	NA	misc_RNA	X	93433002	93433105	+
ENSG00000202412	Y_RNA	NA	misc_RNA	3	129537773	129537876	+
ENSG00000202415	7SK	NA	misc_RNA	1	10007374	10007694	+
ENSG00000202414	Y_RNA	NA	misc_RNA	20	25195332	25195434	+
ENSG00000202417	Y_RNA	NA	misc_RNA	5	132281032	132281146	+
ENSG00000160551	TAOK1	NA	protein_coding	17	27717480	27878922	+
ENSG00000205822	TPTE2P6	NA	processed_transcript	13	25141009	25171814	+
ENSG00000202332	Y_RNA	NA	misc_RNA	17	73428069	73428168	+
ENSG00000152078	TMEM56	NA	protein_coding	1	95582892	95663163	+
ENSG00000172766	NAA16	NA	protein_coding	13	41885339	41951166	+
ENSG00000169174	PCSK9	NA	protein_coding	1	55505219	55530525	+
ENSG00000213316	LTC4S	NA	protein_coding	5	179220985	179223513	+
ENSG00000261030	RP11-791M20.1	NA	lincRNA	X	13111777	13112692	+
ENSG00000207549	MIR521-2	NA	miRNA	19	54219846	54219934	+
ENSG00000123297	TSFM	NA	protein_coding	12	58176370	58201854	+
ENSG00000207546	MIR548C	NA	miRNA	12	65016287	65016385	+
ENSG00000227918	RP11-710A11.2	NA	sense_intronic	10	72307687	72316552	+
ENSG00000227911	RP11-141M1.1	NA	lincRNA	13	33907981	33909403	+
ENSG00000227912	RP11-69C17.3	NA	lincRNA	10	2208524	2211654	+
ENSG00000047597	XK	NA	protein_coding	X	37545010	37591383	+
ENSG00000186222	BLOC1S4	NA	protein_coding	4	6717840	6719387	+
ENSG00000128965	CHAC1	NA	protein_coding	15	41245158	41248710	+
ENSG00000225203	TBC1D4-AS1	NA	antisense	13	75949645	75950209	+
ENSG00000241273	Metazoa_SRP	NA	misc_RNA	15	28632349	28632629	+
ENSG00000225209	RP11-358M3.1	NA	lincRNA	7	67485238	67497677	+
ENSG00000225208	RP11-107I14.2	NA	lincRNA	10	103070773	103071262	+
ENSG00000123124	WWP1	NA	protein_coding	8	87354965	87490649	+
ENSG00000186226	LCE1E	NA	protein_coding	1	152758688	152760902	+
ENSG00000113141	IK	NA	protein_coding	5	140026641	140042063	+
ENSG00000184110	EIF3C	NA	protein_coding	16	28699877	28747051	+
ENSG00000163239	TDRD10	NA	protein_coding	1	154474693	154520623	+
ENSG00000168228	ZCCHC4	NA	protein_coding	4	25314406	25372005	+
ENSG00000049759	NEDD4L	NA	protein_coding	18	55711597	56068772	+
ENSG00000166049	PASD1	NA	protein_coding	X	150732092	150845211	+
ENSG00000166046	TCP11L2	NA	protein_coding	12	106695705	106740793	+
ENSG00000162543	UBXN10	NA	protein_coding	1	20512576	20522541	+
ENSG00000200706	SNORD45	NA	snoRNA	6	38175048	38175121	+
ENSG00000200702	Y_RNA	NA	misc_RNA	X	44260847	44260950	+
ENSG00000200701	U6	NA	snRNA	2	85432047	85432155	+
ENSG00000244179	RP11-315C6.3	NA	processed_transcript	6	110545497	110552835	+
ENSG00000200708	7SK	NA	misc_RNA	2	134353660	134353970	+
ENSG00000245888	CTD-3203P2.2	NA	protein_coding	16	27279524	27301789	+
ENSG00000204010	IFIT1B	NA	protein_coding	10	91137811	91144962	+
ENSG00000201253	RNU4-10P	NA	snRNA	13	73765663	73765804	+
ENSG00000201255	U6	NA	snRNA	17	28687479	28687584	+
ENSG00000206700	U6	NA	snRNA	1	48809879	48809987	+
ENSG00000206702	RNU1-11P	NA	snRNA	6	13214286	13214451	+
ENSG00000206704	Y_RNA	NA	misc_RNA	1	29312220	29312322	+
ENSG00000206708	U6	NA	snRNA	3	39067476	39067584	+
ENSG00000163719	MTMR14	NA	protein_coding	3	9691115	9744077	+
ENSG00000145087	STXBP5L	NA	protein_coding	3	120626917	121143608	+
ENSG00000254083	RP11-452N4.1	NA	lincRNA	8	136246372	136311962	+
ENSG00000254082	CTD-2024D23.1	NA	lincRNA	8	39424222	39437653	+
ENSG00000254087	LYN	NA	protein_coding	8	56792370	56923939	+
ENSG00000254086	RP11-94H18.2	NA	lincRNA	8	29722158	29729177	+
ENSG00000254089	RP11-388K12.2	NA	lincRNA	8	94271893	94310204	+
ENSG00000158113	LRRC43	NA	protein_coding	12	122652283	122688018	+
ENSG00000137770	CTDSPL2	NA	protein_coding	15	44719430	44821236	+
ENSG00000130204	TOMM40	NA	protein_coding	19	45393824	45406946	+
ENSG00000257718	RP11-396F22.1	NA	antisense	12	39300251	39303394	+
ENSG00000130202	PVRL2	NA	protein_coding	19	45349430	45392485	+
ENSG00000130203	APOE	NA	protein_coding	19	45409009	45412650	+
ENSG00000130208	APOC1	NA	protein_coding	19	45417502	45422606	+
ENSG00000157833	FAM59B	NA	protein_coding	2	26395958	26412513	+
ENSG00000168522	FNTA	NA	protein_coding	8	42911294	42940931	+
ENSG00000165533	TTC8	NA	protein_coding	14	89290966	89344335	+
ENSG00000253196	RP11-706C16.7	NA	antisense	8	143844532	143847845	+
ENSG00000253197	CTD-3239E11.2	NA	processed_transcript	8	93895210	93977873	+
ENSG00000253194	RP11-351A11.1	NA	antisense	6	119255948	119352706	+
ENSG00000253190	AC084082.3	NA	lincRNA	8	67024900	67027414	+
ENSG00000253191	IGKV1D-32	NA	IG_V_pseudogene	2	89967230	89967677	+
ENSG00000253199	RP11-421P23.1	NA	lincRNA	8	20831306	20852630	+
ENSG00000141971	FAM125A	NA	protein_coding	19	17516529	17544533	+
ENSG00000141560	FN3KRP	NA	protein_coding	17	80674557	80685893	+
ENSG00000253448	IGLV3-6	NA	IG_V_pseudogene	22	23192548	23192799	+
ENSG00000205056	RP11-693J15.5	NA	lincRNA	12	92860225	92885703	+
ENSG00000150995	ITPR1	NA	protein_coding	3	4535030	4889524	+
ENSG00000121388	RP11-408E5.4	NA	protein_coding	13	19759360	19761644	+
ENSG00000121380	BCL2L14	NA	protein_coding	12	12202776	12291889	+
ENSG00000185158	LRRC37B	NA	protein_coding	17	30334889	30380523	+
ENSG00000198984	MIR345	NA	miRNA	14	100774194	100774293	+
ENSG00000198987	MIR16-2	NA	miRNA	3	160122531	160122613	+
ENSG00000198986	MIRLET7A3	NA	miRNA	22	46508627	46508702	+
ENSG00000178386	ZNF223	NA	protein_coding	19	44556162	44572149	+
ENSG00000171867	PRNP	NA	protein_coding	20	4666880	4682236	+
ENSG00000171864	PRND	NA	protein_coding	20	4702554	4709106	+
ENSG00000171863	RPS7	NA	protein_coding	2	3622793	3628509	+
ENSG00000171862	PTEN	NA	protein_coding	10	89622868	89731687	+
ENSG00000171861	RNMTL1	NA	protein_coding	17	685511	695749	+
ENSG00000041880	PARP3	NA	protein_coding	3	51976359	51982883	+
ENSG00000255621	RP11-377D9.3	NA	processed_transcript	12	13153383	13193613	+
ENSG00000174982	OR4S2	NA	protein_coding	11	55418378	55419315	+
ENSG00000174989	FBXW8	NA	protein_coding	12	117348759	117470180	+
ENSG00000260254	AP000997.2	NA	lincRNA	11	115509279	115517680	+
ENSG00000252719	SNORA18	NA	snoRNA	X	138992061	138992193	+
ENSG00000252718	U6	NA	snRNA	2	60946773	60946876	+
ENSG00000252717	U6	NA	snRNA	1	102325405	102325513	+
ENSG00000252715	U6	NA	snRNA	15	66135820	66135896	+
ENSG00000252713	U6	NA	snRNA	7	72921536	72921604	+
ENSG00000252711	7SK	NA	misc_RNA	6	47683017	47683337	+
ENSG00000161328	LRRC56	NA	protein_coding	11	537525	554916	+
ENSG00000256628	RP11-454H13.5	NA	protein_coding	3	101395272	101396431	+
ENSG00000161326	DUSP14	NA	protein_coding	17	35849935	35873603	+
ENSG00000215046	LL0XNC01-19D8.1	NA	protein_coding	X	101470278	101481785	+
ENSG00000243317	C7orf73	NA	protein_coding	7	135347267	135359972	+
ENSG00000160050	CCDC28B	NA	protein_coding	1	32665985	32670988	+
ENSG00000160051	IQCC	NA	protein_coding	1	32671234	32674288	+
ENSG00000204832	RP11-414K1.3	NA	antisense	10	17428933	17455502	+
ENSG00000231496	RP1-251M9.2	NA	lincRNA	10	11002112	11012779	+
ENSG00000231495	RP1-213J1P__B.2	NA	lincRNA	22	28103576	28105929	+
ENSG00000264299	RP11-680F20.12	NA	antisense	11	125827793	125828547	+
ENSG00000036530	CYP46A1	NA	protein_coding	14	100150649	100193638	+
ENSG00000065989	PDE4A	NA	protein_coding	19	10527447	10580305	+
ENSG00000237896	AC005008.2	NA	protein_coding	7	80804822	80828431	+
ENSG00000175634	RPS6KB2	NA	protein_coding	11	67195963	67202872	+
ENSG00000259035	RP11-666E17.1	NA	lincRNA	14	82207344	82496693	+
ENSG00000231724	RP11-573D15.3	NA	antisense	3	186525479	186535910	+
ENSG00000135324	MRAP2	NA	protein_coding	6	84743473	84800600	+
ENSG00000199767	RNU6-78	NA	snRNA	13	26091255	26091363	+
ENSG00000147402	GABRQ	NA	protein_coding	X	151806635	151825999	+
ENSG00000147403	RPL10	NA	protein_coding	X	153625493	153637504	+
ENSG00000221977	OR4E2	NA	protein_coding	14	22133295	22134238	+
ENSG00000221970	OR2A1	NA	protein_coding	7	144015216	144016150	+
ENSG00000132313	MRPL35	NA	protein_coding	2	86426578	86440917	+
ENSG00000264297	MIR4433	NA	miRNA	2	64567891	64567973	+
ENSG00000237763	AMY1A	NA	protein_coding	1	104197910	104207173	+
ENSG00000237761	RP11-127O4.2	NA	lincRNA	10	106375858	106376731	+
ENSG00000177673	C2orf57	NA	protein_coding	2	232457573	232458994	+
ENSG00000177674	AGTRAP	NA	protein_coding	1	11796139	11810826	+
ENSG00000237765	FAM200B	NA	protein_coding	4	15683378	15690724	+
ENSG00000237764	RP11-3B12.2	NA	processed_transcript	7	124812270	125019375	+
ENSG00000177679	SRRM3	NA	protein_coding	7	75831214	75916605	+
ENSG00000237768	RP11-344N10.2	NA	antisense	10	74831099	74833766	+
ENSG00000240661	RP11-174O3.3	NA	antisense	3	120068355	120086845	+
ENSG00000172009	THOP1	NA	protein_coding	19	2785456	2813599	+
ENSG00000172000	ZNF556	NA	protein_coding	19	2867331	2878515	+
ENSG00000172005	MAL	NA	protein_coding	2	95691427	95719737	+
ENSG00000172006	ZNF554	NA	protein_coding	19	2819870	2835771	+
ENSG00000172007	RAB33B	NA	protein_coding	4	140374959	140397763	+
ENSG00000211855	TRAJ34	NA	TR_J_gene	14	22976649	22976708	+
ENSG00000188277	C15orf62	NA	protein_coding	15	41062157	41064643	+
ENSG00000198805	PNP	NA	protein_coding	14	20937111	20945253	+
ENSG00000211857	TRAJ32	NA	TR_J_gene	14	22978323	22978390	+
ENSG00000248329	RP11-366M4.3	NA	lincRNA	4	165798154	165820117	+
ENSG00000211856	TRAJ33	NA	TR_J_gene	14	22977585	22977643	+
ENSG00000259901	RP5-991G20.4	NA	antisense	16	72823140	72825522	+
ENSG00000248325	RP11-67M24.5	NA	processed_transcript	4	77157420	77177613	+
ENSG00000222406	RNA5SP314	NA	rRNA	10	48931787	48931904	+
ENSG00000138018	EPT1	NA	protein_coding	2	26531413	26618759	+
ENSG00000225905	RP4-758J18.7	NA	antisense	1	1355623	1358071	+
ENSG00000146469	VIP	NA	protein_coding	6	153071931	153080900	+
ENSG00000136147	PHF11	NA	protein_coding	13	50070095	50103123	+
ENSG00000136141	LRCH1	NA	protein_coding	13	47127301	47325710	+
ENSG00000223134	AL122015.1	NA	miRNA	11	33376009	33376091	+
ENSG00000146463	ZMYM4	NA	protein_coding	1	35734566	35887659	+
ENSG00000196800	SPINK14	NA	protein_coding	5	147549294	147554961	+
ENSG00000172915	NBEA	NA	protein_coding	13	35516422	36246873	+
ENSG00000144191	CNGA3	NA	protein_coding	2	98962616	99015064	+
ENSG00000085117	CD82	NA	protein_coding	11	44585975	44641913	+
ENSG00000232600	AC084125.4	NA	antisense	8	145660600	145665354	+
ENSG00000174514	MFSD4	NA	protein_coding	1	205538103	205572046	+
ENSG00000232606	AC010090.1	NA	lincRNA	2	145324000	145337001	+
ENSG00000174516	PELI3	NA	protein_coding	11	66234214	66244808	+
ENSG00000232604	AC010967.3	NA	lincRNA	2	53091371	53093769	+
ENSG00000116731	PRDM2	NA	protein_coding	1	14026691	14151560	+
ENSG00000112893	MAN2A1	NA	protein_coding	5	109025065	109202879	+
ENSG00000221623	AC090150.1	NA	miRNA	8	27005219	27005309	+
ENSG00000224808	SRGAP3-AS1	NA	antisense	3	9055805	9057663	+
ENSG00000224804	AC004878.2	NA	antisense	7	74855310	74864233	+
ENSG00000224805	PDZK1IP1-AS1	NA	antisense	1	47644920	47646011	+
ENSG00000235221	RP11-459J23.1	NA	lincRNA	13	69885463	69896233	+
ENSG00000266031	MIR3666	NA	miRNA	7	114293398	114293510	+
ENSG00000266039	MIR4509-2	NA	miRNA	15	28671635	28671730	+
ENSG00000266038	MIR4659A	NA	miRNA	8	6602683	6602765	+
ENSG00000212424	U1	NA	snRNA	15	45176812	45176978	+
ENSG00000212421	SNORA26	NA	snoRNA	9	89875363	89875500	+
ENSG00000212422	U3	NA	snoRNA	7	10262422	10262637	+
ENSG00000223466	AC064834.2	NA	lincRNA	2	196397757	196403405	+
ENSG00000223461	AC004471.9	NA	antisense	22	19109040	19112016	+
ENSG00000212428	SNORD115	NA	snoRNA	15	25404366	25404426	+
ENSG00000223462	RP11-285G1.9	NA	processed_transcript	10	45432954	45451173	+
ENSG00000138162	TACC2	NA	protein_coding	10	123748707	124014060	+
ENSG00000236968	RP11-298E9.5	NA	lincRNA	10	3266006	3269599	+
ENSG00000140443	IGF1R	NA	protein_coding	15	99192198	99507759	+
ENSG00000170876	TMEM43	NA	protein_coding	3	14166438	14185179	+
ENSG00000170871	KIAA0232	NA	protein_coding	4	6784367	6885897	+
ENSG00000234883	MIR155HG	NA	lincRNA	21	26934219	26947480	+
ENSG00000013619	MAMLD1	NA	protein_coding	X	149531549	149682448	+
ENSG00000117069	ST6GALNAC5	NA	protein_coding	1	77333124	77531396	+
ENSG00000228008	CTD-2330K9.3	NA	protein_coding	3	49941418	49954370	+
ENSG00000113761	ZNF346	NA	protein_coding	5	176449695	176508190	+
ENSG00000113763	UNC5A	NA	protein_coding	5	176237476	176307897	+
ENSG00000169379	ARL13B	NA	protein_coding	3	93698981	93774512	+
ENSG00000140992	PDPK1	NA	protein_coding	16	2587963	2653189	+
ENSG00000169372	CRADD	NA	protein_coding	12	94071149	94288503	+
ENSG00000140995	DEF8	NA	protein_coding	16	90014331	90034468	+
ENSG00000264684	MIR4773-2	NA	miRNA	2	152224846	152224925	+
ENSG00000110492	MDK	NA	protein_coding	11	46402304	46405375	+
ENSG00000264686	AC104458.1	NA	miRNA	1	77183823	77183926	+
ENSG00000111729	CLEC4A	NA	protein_coding	12	8276226	8291203	+
ENSG00000111726	CMAS	NA	protein_coding	12	22199106	22218597	+
ENSG00000111727	HCFC2	NA	protein_coding	12	104458233	104498639	+
ENSG00000111725	PRKAB1	NA	protein_coding	12	120105556	120119435	+
ENSG00000267344	CTB-39G8.3	NA	antisense	17	43474296	43474843	+
ENSG00000267347	AC015849.13	NA	sense_overlapping	17	34145401	34150717	+
ENSG00000267342	RP11-552F3.10	NA	antisense	17	73893139	73896229	+
ENSG00000103485	QPRT	NA	protein_coding	16	29690356	29710020	+
ENSG00000267349	RP11-686D22.9	NA	antisense	17	33805011	33805463	+
ENSG00000107902	LHPP	NA	protein_coding	10	126150401	126302710	+
ENSG00000224116	INHBA-AS1	NA	antisense	7	41733512	41818986	+
ENSG00000224113	RP5-837J1.2	NA	processed_transcript	17	33332273	33333756	+
ENSG00000264536	MIR5706	NA	miRNA	5	118490330	118490411	+
ENSG00000264534	MIR378B	NA	miRNA	3	10371911	10371969	+
ENSG00000264535	AC093788.1	NA	miRNA	4	164444442	164444538	+
ENSG00000264530	Metazoa_SRP	NA	misc_RNA	9	6542092	6542350	+
ENSG00000106052	TAX1BP1	NA	protein_coding	7	27778948	27868880	+
ENSG00000156219	ART3	NA	protein_coding	4	76932335	77033955	+
ENSG00000156218	ADAMTSL3	NA	protein_coding	15	84322836	84708594	+
ENSG00000092969	TGFB2	NA	protein_coding	1	218519575	218617961	+
ENSG00000225444	AC087073.1	NA	lincRNA	2	52600254	52617150	+
ENSG00000225446	RP4-665J23.2	NA	lincRNA	1	91317314	91319843	+
ENSG00000229751	RP11-142M10.2	NA	antisense	10	14033813	14049525	+
ENSG00000229750	AC096649.2	NA	antisense	2	176032630	176033250	+
ENSG00000221568	AC026797.1	NA	miRNA	5	6112222	6112313	+
ENSG00000221567	AF228730.2	NA	miRNA	8	7055960	7056110	+
ENSG00000221564	U6atac	NA	snRNA	12	65332801	65332897	+
ENSG00000221562	U6atac	NA	snRNA	5	129310582	129310694	+
ENSG00000221563	MIR1269A	NA	miRNA	4	67142540	67142646	+
ENSG00000163032	VSNL1	NA	protein_coding	2	17720391	17838285	+
ENSG00000131508	UBE2D2	NA	protein_coding	5	138906014	139008018	+
ENSG00000014824	SLC30A9	NA	protein_coding	4	41992487	42089551	+
ENSG00000244372	Metazoa_SRP	NA	misc_RNA	2	161734056	161734359	+
ENSG00000131503	ANKHD1	NA	protein_coding	5	139781397	139929163	+
ENSG00000152463	OLAH	NA	protein_coding	10	15074224	15115851	+
ENSG00000152464	RPP38	NA	protein_coding	10	15139177	15148129	+
ENSG00000152467	ZSCAN1	NA	protein_coding	19	58545398	58565999	+
ENSG00000260693	AC026150.8	NA	lincRNA	15	30832294	30838172	+
ENSG00000238526	snoU13	NA	snoRNA	1	150234091	150234196	+
ENSG00000238527	SNORD112	NA	snoRNA	14	101364255	101364333	+
ENSG00000238522	snoU13	NA	snoRNA	13	97709631	97709734	+
ENSG00000221691	AC090825.2	NA	miRNA	15	100291922	100292010	+
ENSG00000221693	AL590226.1	NA	miRNA	9	139588586	139588714	+
ENSG00000238528	snoU13	NA	snoRNA	12	66739497	66739602	+
ENSG00000163788	SNRK	NA	protein_coding	3	43328002	43392635	+
ENSG00000182196	ARL6IP4	NA	protein_coding	12	123464331	123467456	+
ENSG00000188133	TMEM215	NA	protein_coding	9	32783495	32787397	+
ENSG00000182199	SHMT2	NA	protein_coding	12	57623108	57628714	+
ENSG00000135119	RNFT2	NA	protein_coding	12	117176094	117291436	+
ENSG00000091436	AC013461.1	NA	protein_coding	2	173940161	174132738	+
ENSG00000260527	RP11-73O6.4	NA	protein_coding	6	126112109	130461627	+
ENSG00000260521	CTD-2576F9.2	NA	lincRNA	15	95399057	95400214	+
ENSG00000260520	RP11-510M2.6	NA	antisense	16	71547764	71551752	+
ENSG00000260523	RP11-483P21.3	NA	lincRNA	16	83831264	83834245	+
ENSG00000266598	RP11-583F2.5	NA	processed_transcript	17	63048025	63049426	+
ENSG00000266599	RP11-466A19.3	NA	antisense	17	30845969	30858510	+
ENSG00000251635	RP11-213G21.2	NA	lincRNA	4	38565622	38572292	+
ENSG00000251637	RP11-119D9.1	NA	lincRNA	11	67653946	67673821	+
ENSG00000266593	MIR4713	NA	miRNA	15	51534385	51534461	+
ENSG00000266591	AC022537.1	NA	miRNA	10	53025083	53025212	+
ENSG00000139737	SLAIN1	NA	protein_coding	13	78272021	78338377	+
ENSG00000051108	HERPUD1	NA	protein_coding	16	56965958	56977798	+
ENSG00000005302	MSL3	NA	protein_coding	X	11776276	11793870	+
ENSG00000257787	RP11-20L19.1	NA	processed_transcript	12	91203051	91204457	+
ENSG00000101255	TRIB3	NA	protein_coding	20	361259	378203	+
ENSG00000252369	RNU7-51P	NA	snRNA	14	83514921	83514984	+
ENSG00000187118	CMC1	NA	protein_coding	3	28283084	28366633	+
ENSG00000227599	RP4-753D4.2	NA	antisense	20	41597381	41600132	+
ENSG00000252864	RNA5SP278	NA	rRNA	8	141950659	141950762	+
ENSG00000143079	CTTNBP2NL	NA	protein_coding	1	112938801	113003786	+
ENSG00000223874	AC007557.1	NA	protein_coding	2	217735493	217736362	+
ENSG00000223872	AC006372.5	NA	lincRNA	7	157294014	157296271	+
ENSG00000223870	AP000233.3	NA	lincRNA	21	26499780	26507561	+
ENSG00000212138	RNA5SP372	NA	rRNA	12	109497789	109497905	+
ENSG00000262456	RP1-59D14.1	NA	antisense	17	2288139	2289958	+
ENSG00000262454	RP11-65J21.3	NA	lincRNA	16	14396143	14420210	+
ENSG00000257771	RP11-70F11.8	NA	lincRNA	12	50305734	50324103	+
ENSG00000258714	RP11-998D10.7	NA	lincRNA	14	21558544	21560491	+
ENSG00000258716	RP11-661G16.2	NA	processed_transcript	14	91163675	91165718	+
ENSG00000112406	HECA	NA	protein_coding	6	139456247	139501939	+
ENSG00000258710	RP11-810K23.3	NA	processed_transcript	15	21184392	21188743	+
ENSG00000258713	C20orf141	NA	protein_coding	20	2795655	2796481	+
ENSG00000255608	RP3-377H17.2	NA	sense_intronic	12	4948119	4951841	+
ENSG00000150627	WDR17	NA	protein_coding	4	176986983	177103978	+
ENSG00000255605	RP11-644L4.1	NA	lincRNA	11	95431248	95433787	+
ENSG00000006652	IFRD1	NA	protein_coding	7	112063021	112121072	+
ENSG00000006659	LGALS14	NA	protein_coding	19	40194944	40200087	+
ENSG00000183747	ACSM2A	NA	protein_coding	16	20462781	20498991	+
ENSG00000250271	RP11-64D22.5	NA	lincRNA	3	151515270	151526037	+
ENSG00000211873	TRAJ16	NA	TR_J_gene	14	22997485	22997546	+
ENSG00000155275	TRMT44	NA	protein_coding	4	8440594	8478253	+
ENSG00000211871	TRAJ18	NA	TR_J_gene	14	22994618	22994685	+
ENSG00000159556	ISL2	NA	protein_coding	15	76629063	76634817	+
ENSG00000211877	TRAJ12	NA	TR_J_gene	14	23000887	23000948	+
ENSG00000211876	TRAJ13	NA	TR_J_gene	14	23000024	23000088	+
ENSG00000211875	TRAJ14	NA	TR_J_gene	14	22999276	22999329	+
ENSG00000211874	TRAJ15	NA	TR_J_pseudogene	14	22998578	22998641	+
ENSG00000211879	TRAJ10	NA	TR_J_gene	14	23002443	23002508	+
ENSG00000211878	TRAJ11	NA	TR_J_gene	14	23001450	23001511	+
ENSG00000218510	LINC00339	NA	lincRNA	1	22351679	22357716	+
ENSG00000164171	ITGA2	NA	protein_coding	5	52285154	52390609	+
ENSG00000198612	COPS8	NA	protein_coding	2	237993953	238009109	+
ENSG00000198618	PPIAP22	NA	pseudogene	21	20230095	20230594	+
ENSG00000242009	RP11-359D24.1	NA	lincRNA	3	81889696	81972012	+
ENSG00000120149	MSX2	NA	protein_coding	5	174151534	174158144	+
ENSG00000161526	SAP30BP	NA	protein_coding	17	73663194	73704139	+
ENSG00000230033	RP5-1121A15.3	NA	lincRNA	7	156737413	156738339	+
ENSG00000160695	VPS11	NA	processed_transcript	11	118938401	118952688	+
ENSG00000124391	IL17C	NA	protein_coding	16	88704999	88706881	+
ENSG00000243660	ZNF487P	NA	protein_coding	10	43932280	43991517	+
ENSG00000216058	MIR944	NA	miRNA	3	189547709	189547798	+
ENSG00000204584	RP11-304F15.3	NA	antisense	17	47923270	47926199	+
ENSG00000252658	U6	NA	snRNA	6	158355198	158355289	+
ENSG00000216054	AC019201.1	NA	miRNA	2	158298060	158298151	+
ENSG00000252657	SNORA70	NA	snoRNA	17	28104635	28104762	+
ENSG00000007216	SLC13A2	NA	protein_coding	17	26800309	26824799	+
ENSG00000252653	RNA5SP444	NA	rRNA	17	64263859	64263966	+
ENSG00000252638	snoU13	NA	snoRNA	1	236464278	236464351	+
ENSG00000266875	Metazoa_SRP	NA	misc_RNA	6	134454709	134455004	+
ENSG00000199564	RNA5SP502	NA	rRNA	X	41152049	41152169	+
ENSG00000199567	Y_RNA	NA	misc_RNA	X	85274610	85274719	+
ENSG00000199562	U6	NA	snRNA	1	10359022	10359130	+
ENSG00000199568	RNU5A-1	NA	snRNA	15	65588387	65588504	+
ENSG00000177479	ARIH2	NA	protein_coding	3	48956252	49023815	+
ENSG00000177476	OR2G3	NA	protein_coding	1	247768854	247769838	+
ENSG00000237560	AC004562.1	NA	lincRNA	17	67957846	67979679	+
ENSG00000237563	TTTY21B	NA	lincRNA	Y	6311473	6315118	+
ENSG00000237568	RP4-620F22.2	NA	antisense	1	89726263	89735437	+
ENSG00000124535	WRNIP1	NA	protein_coding	6	2765646	2786927	+
ENSG00000124532	MRS2	NA	protein_coding	6	24403151	24425810	+
ENSG00000129484	PARP2	NA	protein_coding	14	20811739	20826064	+
ENSG00000240317	Metazoa_SRP	NA	misc_RNA	2	219967154	219967437	+
ENSG00000240310	RP11-24F11.5	NA	processed_transcript	3	46451003	46454488	+
ENSG00000179041	RRS1	NA	protein_coding	8	67341261	67342966	+
ENSG00000249430	CTD-2231H16.1	NA	lincRNA	5	92264	139978	+
ENSG00000205673	LINC00650	NA	lincRNA	21	35321228	35336260	+
ENSG00000249436	CTD-2023N9.3	NA	lincRNA	5	56910214	56913258	+
ENSG00000255382	RP11-718B12.2	NA	processed_transcript	11	82502702	82528188	+
ENSG00000200008	Y_RNA	NA	misc_RNA	15	34014691	34014797	+
ENSG00000200000	SNORD113-5	NA	snoRNA	14	101404522	101404601	+
ENSG00000201354	Y_RNA	NA	misc_RNA	7	140309645	140309755	+
ENSG00000201351	Y_RNA	NA	misc_RNA	14	90643564	90643674	+
ENSG00000201358	7SK	NA	misc_RNA	14	50535284	50535591	+
ENSG00000162999	DUSP19	NA	protein_coding	2	183943285	183964733	+
ENSG00000158092	NCK1	NA	protein_coding	3	136581048	136668665	+
ENSG00000254497	CTD-2560E9.5	NA	antisense	11	45275433	45276200	+
ENSG00000005844	ITGAL	NA	protein_coding	16	30483977	30534289	+
ENSG00000226733	RP11-397G17.1	NA	lincRNA	6	50061422	50066995	+
ENSG00000233714	AC012506.2	NA	lincRNA	2	23570523	23574735	+
ENSG00000121481	RNF2	NA	protein_coding	1	185014494	185071740	+
ENSG00000232044	AC073479.1	NA	lincRNA	2	6072817	6141407	+
ENSG00000232046	AC007392.3	NA	lincRNA	2	66801160	66957289	+
ENSG00000200917	U6	NA	snRNA	4	106328152	106328249	+
ENSG00000200913	SNORD46	NA	snoRNA	1	45242160	45242265	+
ENSG00000144868	TMEM108	NA	protein_coding	3	132757233	133116636	+
ENSG00000177410	ZNFX1-AS1	NA	antisense	20	47894713	47905797	+
ENSG00000254164	CTB-33O18.2	NA	lincRNA	5	173001939	173003278	+
ENSG00000254161	IGLVIV-65	NA	IG_V_pseudogene	22	22424634	22425118	+
ENSG00000145012	LPP	NA	protein_coding	3	187871070	188608460	+
ENSG00000237500	RP11-526P5.1	NA	lincRNA	10	2541911	2542762	+
ENSG00000158023	WDR66	NA	protein_coding	12	122355766	122441833	+
ENSG00000151465	CDC123	NA	protein_coding	10	12237962	12292588	+
ENSG00000174358	SLC6A19	NA	protein_coding	5	1201708	1225232	+
ENSG00000158321	AUTS2	NA	protein_coding	7	69063903	70258054	+
ENSG00000137948	BRDT	NA	protein_coding	1	92414926	92479983	+
ENSG00000033800	PIAS1	NA	protein_coding	15	68346515	68480402	+
ENSG00000175224	ATG13	NA	protein_coding	11	46638824	46696368	+
ENSG00000122824	NUDT10	NA	protein_coding	X	51075081	51080377	+
ENSG00000264838	AP003305.1	NA	miRNA	11	83940601	83940692	+
ENSG00000145907	G3BP1	NA	protein_coding	5	151150604	151192346	+
ENSG00000129103	SUMF2	NA	protein_coding	7	56131693	56148363	+
ENSG00000231312	AC007246.3	NA	processed_transcript	2	39663776	39892483	+
ENSG00000231028	LINC00271	NA	lincRNA	6	135818487	136037193	+
ENSG00000231023	LINC00326	NA	lincRNA	6	133409217	133427717	+
ENSG00000234052	AP001607.1	NA	lincRNA	21	29011010	29025810	+
ENSG00000234055	RP11-247A12.1	NA	antisense	9	131860131	131862545	+
ENSG00000231025	RP11-175O19.4	NA	antisense	10	98752205	98755716	+
ENSG00000087245	MMP2	NA	protein_coding	16	55423610	55540603	+
ENSG00000230998	RP11-14C22.3	NA	lincRNA	10	30944416	30946464	+
ENSG00000082146	STRADB	NA	protein_coding	2	202252579	202345569	+
ENSG00000174827	PDZK1	NA	protein_coding	1	145726916	145764074	+
ENSG00000128276	RFPL3	NA	protein_coding	22	32750870	32757148	+
ENSG00000128271	ADORA2A	NA	protein_coding	22	24819563	24838328	+
ENSG00000128272	ATF4	NA	protein_coding	22	39915698	39918691	+
ENSG00000145506	NKD2	NA	protein_coding	5	1008942	1039058	+
ENSG00000122729	ACO1	NA	protein_coding	9	32384616	32450834	+
ENSG00000176463	SLCO3A1	NA	protein_coding	15	92396923	92715665	+
ENSG00000132434	LANCL2	NA	protein_coding	7	55433139	55501435	+
ENSG00000078699	CBFA2T2	NA	protein_coding	20	32077921	32237842	+
ENSG00000227492	RP11-316M21.6	NA	antisense	10	101989422	101993757	+
ENSG00000143994	ABHD1	NA	protein_coding	2	27346701	27353680	+
ENSG00000143995	MEIS1	NA	protein_coding	2	66662263	66799890	+
ENSG00000065559	MAP2K4	NA	protein_coding	17	11924139	12047147	+
ENSG00000147679	UTP23	NA	protein_coding	8	117778740	117861702	+
ENSG00000243509	TNFRSF6B	NA	protein_coding	20	62328019	62330037	+
ENSG00000235822	RP11-207N4.3	NA	lincRNA	13	32559820	32565134	+
ENSG00000235820	RP5-1022P6.5	NA	antisense	20	5514272	5516535	+
ENSG00000248429	RP11-597D13.9	NA	processed_transcript	4	159091902	159124029	+
ENSG00000248425	AC006296.2	NA	lincRNA	4	14392061	14395616	+
ENSG00000214305	AP001024.1	NA	protein_coding	11	107650217	107652316	+
ENSG00000132294	EFR3A	NA	protein_coding	8	132916333	133025889	+
ENSG00000145293	ENOPH1	NA	protein_coding	4	83351713	83382244	+
ENSG00000119147	C2orf40	NA	protein_coding	2	106679748	106694615	+
ENSG00000227496	RP11-145A3.1	NA	antisense	1	225888304	225939945	+
ENSG00000205659	LIN52	NA	protein_coding	14	74551497	74667936	+
ENSG00000133740	E2F5	NA	protein_coding	8	86089458	86128438	+
ENSG00000266795	RP11-744K17.9	NA	lincRNA	17	21906415	21913070	+
ENSG00000197150	ABCB8	NA	protein_coding	7	150725508	150744869	+
ENSG00000250905	RP11-707F2.1	NA	lincRNA	4	150587207	150632301	+
ENSG00000214309	MBLAC1	NA	protein_coding	7	99724315	99726118	+
ENSG00000250906	RP11-632F7.3	NA	antisense	4	40814794	40828168	+
ENSG00000214188	ST7-OT4	NA	protein_coding	7	116593951	116608628	+
ENSG00000214189	ZNF788	NA	protein_coding	19	12203076	12225499	+
ENSG00000238987	U7	NA	snRNA	6	14156691	14156754	+
ENSG00000249773	RP11-15K19.2	NA	protein_coding	7	55954968	56022932	+
ENSG00000239034	snoU13	NA	snoRNA	4	186867235	186867340	+
ENSG00000239037	snoU13	NA	snoRNA	X	152616929	152617034	+
[truncated: 40,127 more rows]

## Sheet: DataS5
# Supplementary DataS5: Sense strand normalized counts.
# This table is attached as an independent file due to file size limitations

## Sheet: DataS6
# Supplementary DataS6: Antisense strand normalized counts.
# This table is attached as an independet file due to file size limitations

## Sheet: DataS7_Strand_Specificity
# Supplementary DataS7: Percent Strand Specificity and Protocol Error Rate Thresholds for All Samples in the Cohort
				Protocol Error Rate Thresholds
Sample_ID	% Strand Specificity	Column1	Sample_ID2	pe_i_th = pe_i + 1*sd(pei)	pe_i_th = pe_i + 0*sd(pei)	pe_i_th = pe_i + 2*sd(pei)
mctp_sample_1	0.62471		pt_brca_10039	0.0492231	0.00829468	0.0901516
mctp_sample_2	0.218027		pt_brca_10040	0.036857	0.00649897	0.067215
mctp_sample_3	0.532705		pt_brca_10041	0.0607688	0.010111	0.111426
mctp_sample_4	0.401168		pt_brca_10042	0.059578	0.0105259	0.10863
mctp_sample_5	0.790925		pt_brca_10043	0.0578076	0.0112979	0.104317
mctp_sample_6	0.427552		pt_brca_10044	0.0434129	0.00703808	0.0797876
mctp_sample_7	0.500945		pt_brca_10045	0.0519949	0.00857611	0.0954136
mctp_sample_8	0.579277		pt_brca_10046	0.0643374	0.010507	0.118168
mctp_sample_9	0.633169		pt_brca_10047	0.0512447	0.00855007	0.0939394
mctp_sample_10	0.799136		pt_brca_10048	0.0513704	0.00880257	0.0939382
mctp_sample_11	0.675974		pt_brca_10049	0.0762502	0.0142654	0.138235
mctp_sample_12	0.61237		pt_brca_10050	0.0573573	0.00954696	0.105168
mctp_sample_13	0.381232		pt_brca_10051	0.0569098	0.00785494	0.105965
mctp_sample_14	0.26659		pt_brca_10052	0.0259934	0.00553415	0.0464526
mctp_sample_15	1.33259		pt_brca_10053	0.0562637	0.0103411	0.102186
mctp_sample_16	0.405619		pt_brca_10054	0.0327085	0.00654183	0.0588751
mctp_sample_17	0.39656		pt_brca_10055	0.0440369	0.00844529	0.0796285
mctp_sample_18	1.05598		pt_brca_10056	0.0751853	0.0115878	0.138783
mctp_sample_19	0.534142		pt_brca_10057	0.0552799	0.00865243	0.101907
mctp_sample_20	0.75994		pt_brca_10058	0.0610949	0.00995604	0.112234
mctp_sample_21	1.17992		pt_brca_10059	0.0664363	0.0122426	0.12063
mctp_sample_22	0.670111		pt_brca_10060	0.0670942	0.0104094	0.123779
mctp_sample_23	0.395519		pt_brca_10061	0.0439911	0.00820388	0.0797784
mctp_sample_24	0.558034		pt_brca_10062	0.045287	0.00797887	0.0825952
mctp_sample_25	0.435338		pt_brca_10063	0.0332102	0.00762544	0.0587951
mctp_sample_26	0.411135		pt_brca_10064	0.0562493	0.0101869	0.102312
mctp_sample_27	0.548434		pt_brca_10065	0.0477308	0.00893328	0.0865284
mctp_sample_28	0.650309		pt_brca_10066	0.049875	0.00939997	0.0903499
mctp_sample_29	0.349806		pt_brca_10067	0.0530648	0.00842772	0.0977018
mctp_sample_30	0.274852		pt_brca_10068	0.0428721	0.00682008	0.0789241
mctp_sample_31	0.672274		pt_brca_10069	0.0658927	0.0110432	0.120742
mctp_sample_32	0.525719		pt_brca_10070	0.0549349	0.0100913	0.0997785
mctp_sample_33	0.282039		pt_brca_10072	0.0395461	0.0081906	0.0709016
mctp_sample_34	0.623498		pt_brca_10073	0.0706614	0.0129892	0.128334
mctp_sample_35	0.757422		pt_brca_10074	0.0658381	0.0115002	0.120176
mctp_sample_36	0.48543		pt_brca_10075	0.0417864	0.00927085	0.0743019
mctp_sample_37	0.389783		pt_brca_10076	0.0372309	0.00726421	0.0671976
mctp_sample_38	0.553895		pt_brca_10077	0.0420072	0.00739732	0.0766171
mctp_sample_39	0.389989		pt_brca_10078	0.0368139	0.00686055	0.0667673
mctp_sample_40	0.74628		pt_brca_10079	0.0590867	0.0103487	0.107825
mctp_sample_41	0.679055		pt_brca_10080	0.0613962	0.0121617	0.110631
mctp_sample_42	0.368321		pt_brca_10084	0.0510627	0.00890272	0.0932227
mctp_sample_43	0.487543		pt_brca_10087	0.0563894	0.00993982	0.102839
mctp_sample_44	0.686479		pt_brca_10088	0.052875	0.00952927	0.0962207
mctp_sample_45	0.78613		pt_brca_10089	0.0855151	0.0134059	0.157624
mctp_sample_46	0.618308		pt_brca_10090	0.0658304	0.0117271	0.119934
mctp_sample_47	0.309913		pt_brca_10091	0.0556388	0.00807461	0.103203
mctp_sample_48	0.4009		pt_brca_10092	0.0577225	0.0111105	0.104334
mctp_sample_49	0.676118		pt_brca_hcc1599	0.0667514	0.00874934	0.124753
mctp_sample_50	0.505241		pt_brca_hcc2218	0.0547227	0.00875596	0.100689
mctp_sample_51	0.403795		pt_brca_ntu111	0.0624963	0.013091	0.111902
mctp_sample_52	0.204921		pt_brca_ntu115	0.0537083	0.00732712	0.10009
mctp_sample_53	0.355448		pt_brca_ntu116	0.045755	0.0088224	0.0826876
mctp_sample_54	0.348997		pt_brca_ntu117	0.0528542	0.0100187	0.0956897
mctp_sample_55	0.250488		pt_brca_ntu120	0.0421457	0.0075374	0.076754
mctp_sample_56	0.257144		pt_brca_ntu122	0.0469977	0.00893436	0.085061
mctp_sample_57	0.3053		pt_brca_ntu128	0.0535334	0.00933199	0.0977349
mctp_sample_58	0.239094		pt_brca_ntu134	0.0560829	0.00928386	0.102882
mctp_sample_59	0.305257		pt_brca_ntu136	0.0724847	0.0154347	0.129535
mctp_sample_60	0.458686		pt_brca_ntu137	0.0848662	0.0195092	0.150223
mctp_sample_61	0.482001		pt_chca_1001	0.0587252	0.0112567	0.106194
mctp_sample_62	0.458495		pt_chca_1002	0.0470149	0.00934649	0.0846833
mctp_sample_63	0.479734		pt_chca_1003	0.0584368	0.0105925	0.106281
mctp_sample_64	0.313074		pt_cholangio_CCA111325	0.0503493	0.0082502	0.0924484
mctp_sample_65	0.372791		pt_cholangio_CCA12791	0.0475098	0.00880195	0.0862177
mctp_sample_66	0.659835		pt_es_5002	0.0438527	0.00866119	0.0790442
mctp_sample_67	0.460022		pt_es_5003	0.0556602	0.00853248	0.102788
mctp_sample_68	0.626253		pt_es_5005	0.0584932	0.0128123	0.104174
mctp_sample_69	0.706964		pt_lncap_0hr	0.0522742	0.00837932	0.0961691
mctp_sample_70	0.446111		pt_lncap_24hr	0.0312626	0.00645378	0.0560715
mctp_sample_71	0.630575		pt_lncap_6hr	0.0455036	0.00747183	0.0835355
mctp_sample_72	0.4201		pt_lung_A06	0.0515387	0.00901738	0.0940601
mctp_sample_73	0.597774		pt_lung_A07	0.0530576	0.009309	0.0968063
mctp_sample_74	0.848263		pt_lung_A17	0.0658712	0.0135565	0.118186
mctp_sample_75	0.445822		pt_lung_A19	0.0531662	0.0104713	0.095861
mctp_sample_76	0.449004		pt_lung_A21	0.0378755	0.0081703	0.0675807
mctp_sample_77	0.296426		pt_lung_A25	0.0319372	0.00621309	0.0576613
mctp_sample_78	0.410775		pt_lung_A28	0.0579905	0.0103423	0.105639
mctp_sample_79	0.57994		pt_lung_A29	0.0463147	0.00995272	0.0826767
mctp_sample_80	0.465166		pt_lung_A34	0.0753004	0.0128897	0.137711
mctp_sample_81	0.361796		pt_lung_A35	0.0355022	0.0084987	0.0625057
mctp_sample_82	0.314424		pt_lung_A35N	0.0379726	0.00821676	0.0677284
mctp_sample_83	0.487935		pt_lung_A39	0.0602829	0.0105908	0.109975
mctp_sample_84	0.320572		pt_lung_A41	0.0401643	0.00765094	0.0726778
mctp_sample_85	0.50503		pt_lung_A427	0.058401	0.00865588	0.108146
mctp_sample_86	0.347496		pt_lung_A47	0.0454743	0.00909187	0.0818567
mctp_sample_87	0.419899		pt_lung_A49	0.037881	0.00754928	0.0682127
mctp_sample_88	0.527258		pt_lung_A52	0.05651	0.00974796	0.103272
mctp_sample_89	0.321386		pt_lung_A549	0.0431559	0.00688455	0.0794272
mctp_sample_90	0.414777		pt_lung_A61	0.0412359	0.0084965	0.0739752
mctp_sample_91	0.366786		pt_lung_A63	0.0511642	0.00917332	0.0931551
mctp_sample_92	0.56721		pt_lung_A63N	0.0509022	0.0105032	0.0913012
mctp_sample_93	0.463426		pt_lung_A65	0.0704648	0.0116873	0.129242
mctp_sample_94	0.307114		pt_lung_A65N	0.0380594	0.00742614	0.0686927
mctp_sample_95	0.614247		pt_lung_A67	0.0415571	0.00759873	0.0755156
mctp_sample_96	0.617326		pt_lung_A70	0.0518488	0.0102216	0.093476
mctp_sample_97	0.901157		pt_lung_A75	0.0442209	0.00990079	0.0785411
mctp_sample_98	0.487039		pt_lung_A76	0.0420303	0.00866805	0.0753926
mctp_sample_99	0.807045		pt_lung_A85	0.0559174	0.010412	0.101423
mctp_sample_100	0.796725		pt_lung_A93	0.0648037	0.0112774	0.11833
mctp_sample_101	0.995635		pt_lung_C002	0.0619356	0.013188	0.110683
mctp_sample_102	1.21374		pt_lung_C004	0.0725638	0.0126371	0.132491
mctp_sample_103	0.479956		pt_lung_C01	0.058639	0.0112547	0.106023
mctp_sample_104	0.636691		pt_lung_C010	0.0562832	0.0119804	0.100586
mctp_sample_105	0.499585		pt_lung_C011	0.0500136	0.0088596	0.0911677
mctp_sample_106	0.606222		pt_lung_C016	0.0520204	0.0101771	0.0938638
mctp_sample_107	0.93444		pt_lung_C020	0.07162	0.0137637	0.129476
mctp_sample_108	0.555547		pt_lung_C023	0.0626057	0.0111244	0.114087
mctp_sample_109	0.543272		pt_lung_C026	0.0506363	0.00949335	0.0917793
mctp_sample_110	0.505317		pt_lung_C028	0.0441937	0.0083198	0.0800675
mctp_sample_111	0.603216		pt_lung_C030	0.0622546	0.0113689	0.11314
mctp_sample_112	0.563008		pt_lung_C031	0.0551765	0.0102044	0.100149
mctp_sample_113	0.415738		pt_lung_C033	0.0508563	0.0091075	0.092605
mctp_sample_114	0.456074		pt_lung_C037	0.0646106	0.011305	0.117916
mctp_sample_115	0.442807		pt_lung_C038	0.0415273	0.00781347	0.0752412
mctp_sample_116	0.507147		pt_lung_C040	0.0453949	0.00924227	0.0815476
mctp_sample_117	0.670941		pt_lung_C041	0.0577692	0.00992661	0.105612
mctp_sample_118	0.969243		pt_lung_C042	0.0871502	0.0156569	0.158643
mctp_sample_119	0.546091		pt_lung_C045	0.0555989	0.0107296	0.100468
mctp_sample_120	0.668932		pt_lung_C046	0.0628773	0.0125071	0.113247
mctp_sample_121	0.48155		pt_lung_C047	0.0570864	0.0118565	0.102316
mctp_sample_122	0.597334		pt_lung_C051	0.0562904	0.0115888	0.100992
mctp_sample_123	0.718474		pt_lung_C052	0.0563966	0.0100805	0.102713
mctp_sample_124	0.682337		pt_lung_C055	0.0726632	0.0127222	0.132604
mctp_sample_125	0.4562		pt_lung_C056	0.0491662	0.00864394	0.0896884
mctp_sample_126	0.551938		pt_lung_C057	0.060753	0.0122515	0.109255
mctp_sample_127	0.413308		pt_lung_C058	0.065505	0.0121745	0.118836
mctp_sample_128	0.548228		pt_lung_C059	0.0646504	0.0112033	0.118098
mctp_sample_129	0.524856		pt_lung_C062	0.0575125	0.010645	0.10438
mctp_sample_130	0.285553		pt_lung_C071	0.03091	0.00680682	0.0550131
mctp_sample_131	0.88559		pt_lung_C074	0.0778166	0.0172823	0.138351
mctp_sample_132	0.464993		pt_lung_C081	0.0600105	0.0120827	0.107938
mctp_sample_133	0.418031		pt_lung_C083	0.0427573	0.00926935	0.0762453
mctp_sample_134	0.552001		pt_lung_C084	0.0555263	0.00945476	0.101598
mctp_sample_135	0.455373		pt_lung_C085	0.0548954	0.0105738	0.099217
mctp_sample_136	0.516557		pt_lung_C089	0.0594383	0.0106787	0.108198
mctp_sample_137	0.529588		pt_lung_C103	0.0656731	0.0167592	0.114587
mctp_sample_138	0.517869		pt_lung_C111	0.0617446	0.0117804	0.111709
mctp_sample_139	0.557738		pt_lung_C115	0.0500299	0.00940848	0.0906513
mctp_sample_140	0.783982		pt_lung_C116	0.0721852	0.0128796	0.131491
mctp_sample_141	0.338311		pt_lung_C117	0.0356294	0.00790119	0.0633577
mctp_sample_142	0.916917		pt_lung_C99	0.0854505	0.0158715	0.15503
mctp_sample_143	0.575003		pt_lung_endobronchiald1	0.0541138	0.0103431	0.0978845
mctp_sample_144	0.265773		pt_lung_endobronchiald3	0.0534613	0.00849003	0.0984325
mctp_sample_145	0.353946		pt_lung_esophagealflo	0.0487559	0.0070603	0.0904516
mctp_sample_146	0.233358		pt_lung_esophagealhet	0.0333395	0.00476038	0.0619187
mctp_sample_147	0.198499		pt_lung_esophagealoe33	0.0212969	0.00343359	0.0391603
mctp_sample_148	0.616134		pt_lung_H1155	0.0303462	0.00512659	0.0555659
mctp_sample_149	0.357517		pt_lung_H1437	0.0393503	0.00678768	0.0719128
mctp_sample_150	0.513157		pt_lung_H1651	0.0379404	0.00780303	0.0680777
mctp_sample_151	0.333266		pt_lung_H1734	0.070059	0.00971581	0.130402
mctp_sample_152	0.171634		pt_lung_H1792	0.0287023	0.00379754	0.0536071
mctp_sample_153	0.290566		pt_lung_H1793	0.0374403	0.00646601	0.0684145
mctp_sample_154	1.2007		pt_lung_H1838	0.0305214	0.00491565	0.0561272
mctp_sample_155	0.250181		pt_lung_H1975	0.0612487	0.00900327	0.113494
mctp_sample_156	0.719965		pt_lung_H2009	0.0849068	0.0157092	0.154104
mctp_sample_157	0.352899		pt_lung_H2122	0.057847	0.00969387	0.106
mctp_sample_158	0.244398		pt_lung_H2170	0.0258611	0.00610221	0.04562
mctp_sample_159	0.603846		pt_lung_H2228	0.123916	0.0315684	0.216264
mctp_sample_160	0.346744		pt_lung_H23	0.0385221	0.00641269	0.0706315
mctp_sample_161	0.820799		pt_lung_H358	0.0862287	0.0148673	0.15759
mctp_sample_162	0.377556		pt_lung_H441	0.0648422	0.00903657	0.120648
mctp_sample_163	0.358342		pt_lung_H460	0.0592927	0.00908233	0.109503
mctp_sample_164	0.575761		pt_lung_H522	0.0512103	0.00766852	0.094752
mctp_sample_165	0.488788		pt_lung_H526	0.0713344	0.0112989	0.13137
mctp_sample_166	0.693516		pt_lung_H727	0.0687425	0.0124229	0.125062
mctp_sample_167	0.415602		pt_lung_H827	0.0599191	0.00924525	0.110593
mctp_sample_168	0.603227		pt_lung_H838	0.0583119	0.0110079	0.105616
mctp_sample_169	0.388472		pt_lung_L63	0.0572994	0.0108306	0.103768
mctp_sample_171	0.683229		pt_lung_LC1	0.0664222	0.0157816	0.117063
mctp_sample_172	0.511908		pt_lung_LC13	0.0643271	0.0116768	0.116977
mctp_sample_170	0.685037		pt_lung_LC14	0.0566951	0.0110714	0.102319
mctp_sample_173	0.383727		pt_lung_LC2	0.0480639	0.00844985	0.087678
mctp_sample_174	0.357741		pt_lung_LC3	0.0448574	0.00873603	0.0809787
mctp_sample_175	0.92185		pt_lung_LC4	0.0797685	0.0175182	0.142019
mctp_sample_176	0.540819		pt_lung_LC8	0.0555662	0.0107137	0.100419
mctp_sample_178	0.271516		pt_lung_LC9	0.0343475	0.00728307	0.0614119
mctp_sample_177	0.470986		pt_lung_LS1	0.0340683	0.00762767	0.060509
mctp_sample_179	0.415376		pt_lung_LS10	0.0443274	0.00734995	0.0813049
mctp_sample_180	0.415906		pt_lung_LS14	0.0624166	0.0111013	0.113732
mctp_sample_181	0.524747		pt_lung_LS15	0.0624939	0.0135641	0.111424
mctp_sample_182	0.432593		pt_lung_LS16	0.0644809	0.0114188	0.117543
mctp_sample_183	0.666323		pt_lung_LS17	0.0844439	0.0146549	0.154233
mctp_sample_185	0.490234		pt_lung_LS2	0.0721941	0.0125574	0.131831
mctp_sample_186	0.708783		pt_lung_LS20	0.0619349	0.0136848	0.110185
mctp_sample_187	0.80322		pt_lung_LS21	0.0504944	0.0122005	0.0887884
mctp_sample_188	0.533738		pt_lung_LS22	0.0590904	0.0124598	0.105721
mctp_sample_189	0.332821		pt_lung_LS23	0.0470842	0.00903072	0.0851376
mctp_sample_190	0.556094		pt_lung_LS24	0.072844	0.0146521	0.131036
mctp_sample_191	0.436968		pt_lung_LS26	0.0528757	0.0105194	0.0952319
mctp_sample_192	0.554812		pt_lung_LS27	0.0784103	0.0146847	0.142136
mctp_sample_193	0.409945		pt_lung_LS28	0.0603341	0.0122157	0.108452
mctp_sample_184	0.461487		pt_lung_LS29	0.0475603	0.0097541	0.0853666
mctp_sample_194	0.353812		pt_lung_LS31	0.0612226	0.0114658	0.110979
mctp_sample_195	0.463375		pt_lung_LS32	0.0509615	0.00975556	0.0921675
mctp_sample_196	0.247593		pt_lung_LS33	0.0489846	0.00839537	0.0895738
mctp_sample_197	0.565057		pt_lung_LS34	0.0726353	0.0136945	0.131576
mctp_sample_198	0.424998		pt_lung_LS35	0.069737	0.0109503	0.128524
mctp_sample_199	0.499403		pt_lung_LS36	0.0647089	0.0141012	0.115317
mctp_sample_200	0.474531		pt_lung_LS37	0.0657823	0.0127106	0.118854
mctp_sample_201	0.356474		pt_lung_LS38	0.0554399	0.0097842	0.101096
mctp_sample_202	0.384918		pt_lung_LS40	0.060097	0.0116936	0.1085
mctp_sample_203	0.561068		pt_lung_LS42	0.0720689	0.0152333	0.128904
mctp_sample_204	0.451113		pt_lung_LS43	0.0621984	0.0116537	0.112743
mctp_sample_205	0.554708		pt_lung_LS44	0.0588664	0.0124326	0.1053
mctp_sample_206	0.635739		pt_lung_LS45	0.0700926	0.0138402	0.126345
mctp_sample_207	0.466962		pt_lung_LS46	0.0569419	0.0116273	0.102257
mctp_sample_208	0.36435		pt_lung_LS48	0.0532967	0.00939291	0.0972006
mctp_sample_209	0.492949		pt_lung_LS49	0.0509564	0.0101327	0.09178
mctp_sample_210	0.668012		pt_lung_LS5	0.0713898	0.0118799	0.1309
mctp_sample_211	0.714407		pt_lung_LS6	0.074206	0.0158519	0.13256
mctp_sample_212	0.496604		pt_lung_LS8	0.0542171	0.0112206	0.0972135
mctp_sample_213	0.464154		pt_lung_LS9	0.0711084	0.0129873	0.12923
mctp_sample_214	0.273405		pt_lung_SCC01N	0.0443208	0.00869874	0.0799428
mctp_sample_215	0.348382		pt_lung_SCC03N	0.0323942	0.00684737	0.0579411
mctp_sample_216	0.277344		pt_lung_SCC07	0.0366322	0.00730212	0.0659623
mctp_sample_217	0.408004		pt_lung_SKLU1	0.0438434	0.00751063	0.0801762
mctp_sample_218	0.496694		pt_lung_SKMES1	0.0706274	0.0110217	0.130233
mctp_sample_219	0.502693		pt_lung_sw900	0.0616851	0.011311	0.112059
mctp_sample_220	0.457672		pt_meningioma_559078	0.0402181	0.00627522	0.074161
mctp_sample_221	0.366153		pt_meningioma_559085	0.0467517	0.00872258	0.0847808
mctp_sample_222	0.637198		pt_meningioma_559097	0.0567086	0.00884171	0.104576
mctp_sample_223	0.346283		pt_meningioma_559160	0.0542479	0.00884285	0.099653
mctp_sample_224	0.606109		pt_meningioma_562323	0.0506705	0.00833364	0.0930074
mctp_sample_225	0.834291		pt_meningioma_562685	0.0692792	0.0115161	0.127042
mctp_sample_226	0.379206		pt_meningioma_562945	0.0457281	0.00826537	0.0831909
mctp_sample_227	0.426967		pt_meningioma_563018	0.0624314	0.0102206	0.114642
mctp_sample_228	0.457522		pt_meningioma_CR559390	0.0606325	0.00989741	0.111368
mctp_sample_229	0.472469		pt_meningioma_CR559513	0.0464945	0.00871076	0.0842783
mctp_sample_230	0.395767		pt_meningioma_CR559775	0.0472853	0.00804617	0.0865244
mctp_sample_231	0.841775		pt_meningioma_CR559974	0.0762167	0.0127876	0.139646
mctp_sample_232	3.26744		pt_mo_1005	0.224376	0.0906032	0.35815
mctp_sample_233	0.429849		pt_mo_1006	0.0439879	0.00867505	0.0793008
mctp_sample_234	1.25789		pt_mo_1007	0.0898724	0.0246706	0.155074
mctp_sample_235	0.442979		pt_mo_1009	0.0573843	0.00875958	0.106009
mctp_sample_236	0.782993		pt_mo_1010	0.0525725	0.00926114	0.0958838
mctp_sample_237	6.98554		pt_mo_1011	0.198208	0.0660483	0.330369
mctp_sample_238	0.536726		pt_mo_1016	0.0570008	0.0101592	0.103842
mctp_sample_239	1.12606		pt_mo_1025	0.100823	0.0206746	0.180972
mctp_sample_240	0.637335		pt_mo_1026	0.0448369	0.0105977	0.0790761
mctp_sample_241	1.18909		pt_mo_1027	0.0767302	0.0167912	0.136669
mctp_sample_242	0.389268		pt_mo_1028	0.0582068	0.00909351	0.10732
mctp_sample_243	0.567622		pt_mo_1029	0.0515819	0.00992256	0.0932412
mctp_sample_244	0.720555		pt_mo_1031	0.0671566	0.0117733	0.12254
mctp_sample_245	0.615202		pt_mo_1032	0.0634379	0.0118877	0.114988
mctp_sample_246	1.36427		pt_mo_1033	0.0700926	0.0122444	0.127941
mctp_sample_247	0.505911		pt_mo_1039	0.0436644	0.00873235	0.0785964
mctp_sample_248	0.47845		pt_mo_1042	0.0508593	0.010223	0.0914956
mctp_sample_249	1.00384		pt_mo_1043	0.0937151	0.0198815	0.167549
mctp_sample_250	0.49683		pt_mo_1046	0.0334312	0.00795846	0.0589039
mctp_sample_251	1.04396		pt_mo_1047	0.0685193	0.0156938	0.121345
mctp_sample_252	0.507281		pt_mo_1049	0.0791852	0.0135312	0.144839
mctp_sample_253	0.60569		pt_mo_1051	0.054389	0.00893323	0.0998448
mctp_sample_254	1.06734		pt_mo_1053	0.0656719	0.0124491	0.118895
mctp_sample_255	0.69121		pt_mo_1055	0.0579003	0.0109945	0.104806
mctp_sample_256	0.712308		pt_mo_1058	0.0620807	0.0107365	0.113425
mctp_sample_257	0.816565		pt_mo_1061	0.0533806	0.0101386	0.0966226
mctp_sample_258	0.606812		pt_mo_1062	0.0552381	0.00960529	0.100871
mctp_sample_259	0.850425		pt_mo_1063	0.0637856	0.0117491	0.115822
mctp_sample_260	0.89889		pt_mo_1064	0.075388	0.013829	0.136947
mctp_sample_261	0.955903		pt_mo_1065	0.0612446	0.0113451	0.111144
mctp_sample_262	0.551088		pt_mo_1067	0.0657311	0.0104274	0.121035
mctp_sample_263	0.484529		pt_mo_1068	0.0581593	0.0105459	0.105773
mctp_sample_264	0.79941		pt_mo_1069	0.0788587	0.0130033	0.144714
mctp_sample_265	0.467894		pt_mo_1070	0.0399636	0.00768708	0.0722401
mctp_sample_266	0.849517		pt_mo_1071	0.0495384	0.00783984	0.0912369
mctp_sample_267	0.752751		pt_mo_1072	0.0771487	0.0137769	0.14052
mctp_sample_268	0.339561		pt_mo_1073	0.0256166	0.00530078	0.0459324
mctp_sample_269	0.502174		pt_mo_1074	0.0487573	0.0102237	0.0872908
mctp_sample_270	1.17912		pt_mo_1077	0.0636401	0.0136555	0.113625
mctp_sample_271	0.466475		pt_mo_1079	0.0617875	0.0119328	0.111642
mctp_sample_272	6.73332		pt_mo_1085	0.335619	0.170926	0.500311
mctp_sample_273	0.906135		pt_mo_1086	0.0657786	0.0129296	0.118628
mctp_sample_274	0.879413		pt_mo_1087	0.0626868	0.0122296	0.113144
mctp_sample_275	0.680946		pt_osteosarcoma_hu09	0.0447691	0.00887762	0.0806606
mctp_sample_276	0.672547		pt_osteosarcoma_jwrna	0.0609089	0.0106465	0.111171
mctp_sample_277	0.363752		pt_osteosarcoma_mg63	0.0667543	0.0108958	0.122613
mctp_sample_278	0.263076		pt_osteosarcoma_os99	0.0454782	0.00891439	0.082042
mctp_sample_279	0.684281		pt_osteosarcoma_soas2	0.0627315	0.0108751	0.114588
mctp_sample_280	0.346347		pt_ovarian_59M	0.0342121	0.00671588	0.0617082
mctp_sample_281	0.484242		pt_ovarian_A2780	0.0662397	0.0106613	0.121818
mctp_sample_282	0.536575		pt_ovarian_es2	0.0631993	0.0111185	0.11528
mctp_sample_283	0.255953		pt_ovarian_hch1	0.042627	0.00643848	0.0788155
mctp_sample_284	0.324087		pt_ovarian_Hec59	0.0307068	0.00541566	0.055998
mctp_sample_285	0.474592		pt_ovarian_igrov1	0.070045	0.0114366	0.128653
mctp_sample_286	0.640976		pt_ovarian_OAW28	0.0597239	0.0105279	0.10892
mctp_sample_287	0.397831		pt_ovarian_oc316	0.0536912	0.00735729	0.100025
mctp_sample_288	0.46934		pt_ovarian_ovacr5	0.059814	0.00911155	0.110517
mctp_sample_289	0.536248		pt_ovarian_ovas	0.0764552	0.0102967	0.142614
mctp_sample_290	0.528932		pt_ovarian_ovcar3	0.0657563	0.0107167	0.120796
mctp_sample_291	0.367699		pt_ovarian_OVCAR4	0	0	0
mctp_sample_292	1.19573		pt_ovarian_ovmana	0.0541501	0.00804214	0.100258
mctp_sample_293	1.06141		pt_ovarian_ovsayo	0.0795988	0.0138763	0.145321
mctp_sample_294	0.311611		pt_ovarian_ovtoko	0.0727485	0.0112224	0.134275
mctp_sample_295	0.320062		pt_ovarian_PE01	0.0534901	0.00745235	0.0995278
mctp_sample_296	0.220084		pt_ovarian_pea1	0.0316329	0.00502416	0.0582415
mctp_sample_297	0.447622		pt_ovarian_peo23	0.0749694	0.0144391	0.1355
mctp_sample_298	0.511727		pt_ovarian_RMG1	0.0543748	0.00748315	0.101267
mctp_sample_299	0.35067		pt_ovarian_TOV112D	0.0387755	0.00554339	0.0720075
mctp_sample_300	0.245884		pt_ovarian_TOV21	0.0240236	0.00331839	0.0447288
mctp_sample_301	0.464757		pt_ovarian_UC101	0.0519257	0.00739794	0.0964534
mctp_sample_302	0.803707		pt_ovarian_UH01	0.064812	0.0116014	0.118023
mctp_sample_303	0.778475		pt_panc_11573	0.0624247	0.0134879	0.111362
mctp_sample_304	0.642679		pt_panc_PEN11	0.0573534	0.00899814	0.105709
mctp_sample_305	0.620847		pt_panc_PEN14A	0.0811587	0.0160426	0.146275
mctp_sample_306	0.332992		pt_panc_PEN19	0.0456585	0.00916462	0.0821524
mctp_sample_307	1.03012		pt_panc_PEN20	0.0796512	0.0136705	0.145632
mctp_sample_308	0.517908		pt_panc_PEN22	0.064928	0.0129384	0.116918
mctp_sample_309	0.835308		pt_panc_PEN23	0.0622814	0.011142	0.113421
mctp_sample_310	0.43753		pt_panc_PEN24B	0.0596241	0.0101664	0.109082
mctp_sample_311	0.431095		pt_panc_PEN29	0.0580857	0.0100056	0.106166
mctp_sample_312	0.338121		pt_panc_PEN30	0.0431711	0.00900884	0.0773333
mctp_sample_313	1.02803		pt_panc_PEN31	0.0842054	0.0147235	0.153687
mctp_sample_314	0.504715		pt_panc_PEN33	0.082221	0.0153316	0.14911
mctp_sample_315	0.771789		pt_panc_PEN35A	0.0544832	0.0119764	0.0969901
mctp_sample_316	1.61321		pt_panc_PEN37	0.0631292	0.0107852	0.115473
mctp_sample_317	0.767051		pt_panc_PEN38	0.0704143	0.0127687	0.12806
mctp_sample_318	0.66448		pt_panc_PEN6	0.0588711	0.0110112	0.106731
mctp_sample_319	0.739909		pt_panc_PEN7	0.0681736	0.0120634	0.124284
mctp_sample_320	1.41386		pt_po_3001	0.0650305	0.0139576	0.116103
mctp_sample_321	0.792423		pt_po_3002	0.0560043	0.00977289	0.102236
mctp_sample_322	1.06978		pt_po_3003	0.0640089	0.0109499	0.117068
mctp_sample_323	0.898684		pt_po_3006	0.0669189	0.0129484	0.120889
mctp_sample_324	0.952466		pt_po_3008	0.0596317	0.00950865	0.109755
mctp_sample_325	0.32542		pt_po_3009	0.0492057	0.0086406	0.0897708
mctp_sample_326	0.553808		pt_po_3012	0.09346	0.0222272	0.164693
mctp_sample_327	2.17254		pt_po_3013	0.104265	0.0228231	0.185707
mctp_sample_328	0.636399		pt_prca_20001	0.052546	0.00997915	0.0951128
mctp_sample_329	0.826528		pt_prca_20002	0.0621624	0.0125653	0.111759
mctp_sample_330	0.934764		pt_prca_20003	0.0711448	0.0161866	0.126103
mctp_sample_331	0.924713		pt_prca_20004	0.0698019	0.0140023	0.125601
mctp_sample_332	0.896636		pt_prca_20005	0.0718872	0.0140679	0.129706
mctp_sample_333	0.626249		pt_prca_20006	0.047376	0.0098061	0.0849459
mctp_sample_334	0.610265		pt_prca_20007	0.0371922	0.0086281	0.0657564
mctp_sample_335	0.886607		pt_prca_20008	0.0428674	0.00856619	0.0771686
mctp_sample_336	0.707396		pt_prca_20009	0.0595892	0.0115349	0.107644
mctp_sample_337	0.70439		pt_prca_20010	0.0471587	0.00934369	0.0849737
mctp_sample_338	1.32134		pt_prca_20011	0.0666313	0.012379	0.120884
mctp_sample_339	0.299681		pt_prca_rwpe	0.0429482	0.00754727	0.0783491
mctp_sample_346	1.42941		pt_prca_waf_35	0.0848969	0.0158536	0.15394
mctp_sample_340	1.14877		pt_prca_waf_57	0.0848992	0.0254224	0.144376
mctp_sample_341	0.835757		pt_prca_waf1834	0.0674744	0.0115686	0.12338
mctp_sample_342	1.43086		pt_prca_waf192	0.0696709	0.0125376	0.126804
mctp_sample_343	0.83492		pt_prca_waf2019	0.0600733	0.0105359	0.109611
mctp_sample_344	1.11182		pt_prca_waf2331	0.0636036	0.00977098	0.117436
mctp_sample_345	1.25116		pt_prca_waf242	0.0725449	0.0189448	0.126145
mctp_sample_347	0.605136		pt_prca_waf266	0.0388004	0.00712006	0.0704807
mctp_sample_348	0.582095		pt_prca_waf283	0.0515853	0.00842229	0.0947484
mctp_sample_349	0.638949		pt_prca_waf376	0.056479	0.00942161	0.103536
mctp_sample_350	0.72792		pt_prca_waf3957	0.0517256	0.00885562	0.0945956
mctp_sample_351	0.84767		pt_prca_waf4116	0.0431276	0.00814148	0.0781137
mctp_sample_352	1.42144		pt_prca_waf4327	0.0577369	0.0105994	0.104874
mctp_sample_353	0.703759		pt_prca_waf5211	0.0564448	0.0108379	0.102052
mctp_sample_354	0.773107		pt_prca_waf5623	0.0594278	0.00924717	0.109608
mctp_sample_355	0.496423		pt_rare_A204	0.0496819	0.00790298	0.0914609
mctp_sample_356	0.621091		pt_rare_bewo	0.0715998	0.0109816	0.132218
mctp_sample_357	0.531197		pt_rare_egi1	0.060493	0.00835453	0.112631
mctp_sample_358	0.751131		pt_rare_hc1	0.089623	0.0159875	0.163258
mctp_sample_359	1.2214		pt_rare_L428	0.0787599	0.0136874	0.143832
mctp_sample_360	0.268153		pt_rare_merkelcell1	0.0429246	0.00676116	0.0790881
mctp_sample_361	0.367511		pt_rare_merkelcell2	0.05497	0.00922565	0.100714
mctp_sample_362	0.854417		pt_rare_merkelcell3	0.0645863	0.0125734	0.116599
mctp_sample_363	0.63615		pt_rare_merkelcell4	0.0617659	0.0128336	0.110698
mctp_sample_364	0.612098		pt_rare_merkelcell5	0.0483686	0.00844316	0.088294
mctp_sample_365	0.509347		pt_rare_merkelcell6	0.0433288	0.00852469	0.0781328
mctp_sample_366	0.666627		pt_rare_merkelcell7	0.0484494	0.00841445	0.0884842
mctp_sample_367	0.825279		pt_rare_merkelcell8	0.068039	0.0144717	0.121606
mctp_sample_368	0.294117		pt_rare_RH18	0.0362113	0.00594737	0.0664753
mctp_sample_369	1.7238		pt_rare_snuc	0.0443573	0.00739097	0.0813235
mctp_sample_370	0.93504		pt_rare_suphd1	0.0789688	0.0126923	0.145245
mctp_sample_371	0.645416		pt_rare_tfk1	0.0742326	0.0121873	0.136278
mctp_sample_372	0.704376		pt_sarcoma_sft40	0.0821172	0.0139655	0.150269
mctp_sample_373	1.03078		pt_sarcoma_sft44	0.0768308	0.0205233	0.133138
mctp_sample_374	0.600115		pt_vcap_0hr	0.0586406	0.00888284	0.108398
mctp_sample_375	0.389998		pt_vcap_24hr	0.0531883	0.00891256	0.097464
mctp_sample_376	0.346095		pt_vcap_6hr	0.0573817	0.00830586	0.106458
Average	0.635849		MEAN	0.0586779	0.0113356	0.10602
Minimum	0.171634		SD	0.0232525	0.0101902	0.0374489
Maximum	6.98554		MEDIAN	0.0573264	0.0101886	0.104326

## Sheet: DataS8_All_Cohorts
# Supplementary DataS8: Number of antisense loci per cancer subtype
LUAD
Total Transcripts	42129				Percentage
Expressed Transcripts: Transcripts with expression >= 10 reads in at least one sample	30973			Expressed/Total	0.735194
OPS expression	Number of loci with OPS > pe_i_th in at least 30% samples in cohort. pe_i_th = pe_i + 1*s.d(pe_i)
	11902			OPS loci/Expressed	0.38427
NASTISeq Nomination	Number of Antisense Loci across major cohorts
	10080			NASTISeq/OPS loci	0.846916
Annotation	Average number of known member of cis-NAT pair	Unannotated as member of cis-NAT pair
	9129	951		known NASTISeq/NASTISeq	0.905655
BRCA
Total Transcripts	42129
Expressed Transcripts: Transcripts with expression >= 10 reads in at least one sample	30846			Expressed/Total	0.73218
OPS expression	Number of loci with OPS > pe_i_th in at least 30% samples in cohort. pe_i_th = pe_i + 1*s.d(pe_i)
	11377			OPS loci/Expressed	0.368832
NASTISeq Nomination	Number of Antisense Loci across major cohorts
	10243			NASTISeq/OPS loci	0.900325
Annotation	Average number of known member of cis-NAT pair	Unannotated as member of cis-NAT pair
	9259	984		known NASTISeq/NASTISeq	0.903934
LUSC
Total Transcripts	42129
Expressed Transcripts: Transcripts with expression >= 10 reads in at least one sample	30055			Expressed/Total	0.713404
OPS expression	Number of loci with OPS > pe_i_th in at least 30% samples in cohort. pe_i_th = pe_i + 1*s.d(pe_i)
	11828			OPS loci/Expressed	0.393545
NASTISeq Nomination	Number of Antisense Loci across major cohorts
	10000			NASTISeq/OPS loci	0.845451
Annotation	Average number of known member of cis-NAT pair	Unannotated as member of cis-NAT pair
	8999	1001		known NASTISeq/NASTISeq	0.8999
LUCL
Total Transcripts	42129
Expressed Transcripts: Transcripts with expression >= 10 reads in at least one sample	29820			Expressed/Total	0.707826
OPS expression	Number of loci with OPS > pe_i_th in at least 30% samples in cohort. pe_i_th = pe_i + 1*s.d(pe_i)
	10356			OPS loci/Expressed	0.347284
NASTISeq Nomination	Number of Antisense Loci across major cohorts
	9113			NASTISeq/OPS loci	0.879973
Annotation	Average number of known member of cis-NAT pair	Unannotated as member of cis-NAT pair
	8602	511		known NASTISeq/NASTISeq	0.943926
PRCA
Total Transcripts	42129
Expressed Transcripts: Transcripts with expression >= 10 reads in at least one sample	30380			Expressed/Total	0.721118
OPS expression	Number of loci with OPS > pe_i_th in at least 30% samples in cohort. pe_i_th = pe_i + 1*s.d(pe_i)
	11047			OPS loci/Expressed	0.363627
NASTISeq Nomination	Number of Antisense Loci across major cohorts
	9729			NASTISeq/OPS loci	0.880692
Annotation	Average number of known member of cis-NAT pair	Unannotated as member of cis-NAT pair
	8756	973		known NASTISeq/NASTISeq	0.89999
OVARIAN (OV)
Total Transcripts	42129
Expressed Transcripts: Transcripts with expression >= 10 reads in at least one sample	28703			Expressed/Total	0.681312
OPS expression	Number of loci with OPS > pe_i_th in at least 30% samples in cohort. pe_i_th = pe_i + 1*s.d(pe_i)
	10156			OPS loci/Expressed	0.353831
NASTISeq Nomination	Number of Antisense Loci across major cohorts
	8484			NASTISeq/OPS loci	0.835368
Annotation	Average number of known member of cis-NAT pair	Unannotated as member of cis-NAT pair
	8189	295		known NASTISeq/NASTISeq	0.965229
PANCREAS (PANC)
Total Transcripts	42129
Expressed Transcripts: Transcripts with expression >= 10 reads in at least one sample	28716			Expressed/Total	0.681621
OPS expression	Number of loci with OPS > pe_i_th in at least 30% samples in cohort. pe_i_th = pe_i + 1*s.d(pe_i)
	10157			OPS loci/Expressed	0.353705
NASTISeq Nomination	Number of Antisense Loci across major cohorts
	8302			NASTISeq/OPS loci	0.817367
Annotation	Average number of known member of cis-NAT pair	Unannotated as member of cis-NAT pair
	7956	346		known NASTISeq/NASTISeq	0.958323
MENINGIOMA (MENG)
Total Transcripts	42129
Expressed Transcripts: Transcripts with expression >= 10 reads in at least one sample	26795			Expressed/Total	0.636023
OPS expression	Number of loci with OPS > pe_i_th in at least 30% samples in cohort. pe_i_th = pe_i + 1*s.d(pe_i)
	10793			OPS loci/Expressed	0.402799
NASTISeq Nomination	Number of Antisense Loci across major cohorts
	7405			NASTISeq/OPS loci	0.686093
Annotation	Average number of known member of cis-NAT pair	Unannotated as member of cis-NAT pair
	7241	164		known NASTISeq/NASTISeq	0.977853

## Sheet: DataS9_BLAST_siRNAs
#Supplementary DataS9: BLAST results for NKX2-1-AS1 siRNAs and HOXD-AS1 siRNAs
NKX-2-1-AS-1 siRNA-1
Molecule type
nucleic acid
Query Length
19
Database Name
Human G+T (2 databases)
Description
See details
Program
BLASTN 2.2.30+ Citation
Transcripts	Description	Max score	Total score	Query cover	E value	Ident	Accession
Select seq ref|NR_103710.1|	Homo sapiens NKX2-1 antisense RNA 1 (NKX2-1-AS1), long non-coding RNA	38.2	38.2	1	0.061	1	NR_103710.1
Select seq ref|XM_005269027.1|	PREDICTED: Homo sapiens Mdm1 nuclear protein homolog (mouse) (MDM1), transcript variant X2, mRNA	28.2	28.2	0.73	59	1	XM_005269027.1
Select seq ref|XM_005269026.1|	PREDICTED: Homo sapiens Mdm1 nuclear protein homolog (mouse) (MDM1), transcript variant X1, mRNA	28.2	28.2	0.73	59	1	XM_005269026.1
Select seq ref|NM_001205028.1|	Homo sapiens Mdm1 nuclear protein homolog (mouse) (MDM1), transcript variant 4, mRNA	28.2	28.2	0.73	59	1	NM_001205028.1
Select seq ref|NM_017440.4|	Homo sapiens Mdm1 nuclear protein homolog (mouse) (MDM1), transcript variant 1, mRNA	28.2	28.2	0.73	59	1	NM_017440.4
Select seq ref|XM_005268869.2|	PREDICTED: Homo sapiens ADP-ribosylation factor-like 1 (ARL1), transcript variant X1, mRNA	26.3	26.3	0.68	233	1	XM_005268869.2
Select seq ref|XM_006716715.1|	PREDICTED: Homo sapiens RNA terminal phosphate cyclase-like 1 (RCL1), transcript variant X1, mRNA	26.3	26.3	0.68	233	1	XM_006716715.1
Select seq ref|XM_006715926.1|	PREDICTED: Homo sapiens piccolo presynaptic cytomatrix protein (PCLO), transcript variant X1, mRNA	26.3	26.3	0.68	233	1	XM_006715926.1
Select seq ref|XM_006710924.1|	PREDICTED: Homo sapiens DENN/MADD domain containing 2D (DENND2D), transcript variant X4, mRNA	26.3	26.3	0.68	233	1	XM_006710924.1
Select seq ref|XM_006710923.1|	PREDICTED: Homo sapiens DENN/MADD domain containing 2D (DENND2D), transcript variant X3, mRNA	26.3	26.3	0.68	233	1	XM_006710923.1
Select seq ref|XM_006710922.1|	PREDICTED: Homo sapiens DENN/MADD domain containing 2D (DENND2D), transcript variant X2, mRNA	26.3	26.3	0.68	233	1	XM_006710922.1
Select seq ref|NM_001286699.1|	Homo sapiens RNA terminal phosphate cyclase-like 1 (RCL1), transcript variant 2, mRNA	26.3	26.3	0.68	233	1	NM_001286699.1
Select seq ref|NM_001286700.1|	Homo sapiens RNA terminal phosphate cyclase-like 1 (RCL1), transcript variant 3, mRNA	26.3	26.3	0.68	233	1	NM_001286700.1
Select seq ref|NM_005772.4|	Homo sapiens RNA terminal phosphate cyclase-like 1 (RCL1), transcript variant 1, mRNA	26.3	26.3	0.68	233	1	NM_005772.4
Select seq ref|NM_001286701.1|	Homo sapiens RNA terminal phosphate cyclase-like 1 (RCL1), transcript variant 4, mRNA	26.3	26.3	0.68	233	1	NM_001286701.1
Select seq ref|NM_006313.2|	Homo sapiens ubiquitin specific peptidase 15 (USP15), transcript variant 2, mRNA	26.3	26.3	0.89	233	0.94	NM_006313.2
Select seq ref|NM_001252078.1|	Homo sapiens ubiquitin specific peptidase 15 (USP15), transcript variant 1, mRNA	26.3	26.3	0.89	233	0.94	NM_001252078.1
Select seq ref|NM_001177.4|	Homo sapiens ADP-ribosylation factor-like 1 (ARL1), mRNA	26.3	26.3	0.68	233	1	NM_001177.4
Select seq ref|NM_016026.3|	Homo sapiens retinol dehydrogenase 11 (all-trans/9-cis/11-cis) (RDH11), transcript variant 1, mRNA	26.3	26.3	0.68	233	1	NM_016026.3
Select seq ref|NM_033026.5|	Homo sapiens piccolo presynaptic cytomatrix protein (PCLO), transcript variant 1, mRNA	26.3	26.3	0.68	233	1	NM_033026.5
Select seq ref|NM_014510.2|	Homo sapiens piccolo presynaptic cytomatrix protein (PCLO), transcript variant 2, mRNA	26.3	26.3	0.68	233	1	NM_014510.2
Select seq ref|NM_080681.2|	Homo sapiens collagen, type XI, alpha 2 (COL11A2), transcript variant 2, mRNA	26.3	26.3	0.68	233	1	NM_080681.2
Select seq ref|NM_080680.2|	Homo sapiens collagen, type XI, alpha 2 (COL11A2), transcript variant 1, mRNA	26.3	26.3	0.68	233	1	NM_080680.2
Select seq ref|NM_080679.2|	Homo sapiens collagen, type XI, alpha 2 (COL11A2), transcript variant 3, mRNA	26.3	26.3	0.68	233	1	NM_080679.2
NKX-2-1-AS-1 siRNA-s
Molecule type
nucleic acid
Query Length
19
Database Name
Human G+T (2 databases)
Description
See details
Program
BLASTN 2.2.30+ Citation
Transcripts	Description	Max score	Total score	Query cover	E value	Ident	Accession
Select seq ref|NR_103710.1|	Homo sapiens NKX2-1 antisense RNA 1 (NKX2-1-AS1), long non-coding RNA	38.2	38.2	1	0.061	1	NR_103710.1
Select seq ref|XM_006724668.1|	PREDICTED: Homo sapiens alpha thalassemia/mental retardation syndrome X-linked (ATRX), transcript variant X8, mRNA	30.2	30.2	0.78	15	1	XM_006724668.1
Select seq ref|XM_006724667.1|	PREDICTED: Homo sapiens alpha thalassemia/mental retardation syndrome X-linked (ATRX), transcript variant X7, mRNA	30.2	30.2	0.78	15	1	XM_006724667.1
Select seq ref|XM_005262157.2|	PREDICTED: Homo sapiens alpha thalassemia/mental retardation syndrome X-linked (ATRX), transcript variant X5, mRNA	30.2	30.2	0.78	15	1	XM_005262157.2
Select seq ref|XM_005262156.2|	PREDICTED: Homo sapiens alpha thalassemia/mental retardation syndrome X-linked (ATRX), transcript variant X4, mRNA	30.2	30.2	0.78	15	1	XM_005262156.2
Select seq ref|XM_006724666.1|	PREDICTED: Homo sapiens alpha thalassemia/mental retardation syndrome X-linked (ATRX), transcript variant X6, mRNA	30.2	30.2	0.78	15	1	XM_006724666.1
Select seq ref|XM_005262155.2|	PREDICTED: Homo sapiens alpha thalassemia/mental retardation syndrome X-linked (ATRX), transcript variant X3, mRNA	30.2	30.2	0.78	15	1	XM_005262155.2
Select seq ref|XM_005262154.2|	PREDICTED: Homo sapiens alpha thalassemia/mental retardation syndrome X-linked (ATRX), transcript variant X2, mRNA	30.2	30.2	0.78	15	1	XM_005262154.2
Select seq ref|XM_005262153.2|	PREDICTED: Homo sapiens alpha thalassemia/mental retardation syndrome X-linked (ATRX), transcript variant X1, mRNA	30.2	30.2	0.78	15	1	XM_005262153.2
Select seq ref|XM_006713540.1|	PREDICTED: Homo sapiens neuroligin 1 (NLGN1), transcript variant X8, mRNA	30.2	30.2	0.78	15	1	XM_006713540.1
Select seq ref|NM_138270.3|	Homo sapiens alpha thalassemia/mental retardation syndrome X-linked (ATRX), transcript variant 2, mRNA	30.2	30.2	0.78	15	1	NM_138270.3
Select seq ref|NM_000489.4|	Homo sapiens alpha thalassemia/mental retardation syndrome X-linked (ATRX), transcript variant 1, mRNA	30.2	30.2	0.78	15	1	NM_000489.4
Select seq ref|XM_005247236.1|	PREDICTED: Homo sapiens neuroligin 1 (NLGN1), transcript variant X6, mRNA	30.2	30.2	0.78	15	1	XM_005247236.1
Select seq ref|XM_005247235.1|	PREDICTED: Homo sapiens neuroligin 1 (NLGN1), transcript variant X5, mRNA	30.2	30.2	0.78	15	1	XM_005247235.1
Select seq ref|XM_005247234.1|	PREDICTED: Homo sapiens neuroligin 1 (NLGN1), transcript variant X4, mRNA	30.2	30.2	0.78	15	1	XM_005247234.1
Select seq ref|XM_005247233.1|	PREDICTED: Homo sapiens neuroligin 1 (NLGN1), transcript variant X3, mRNA	30.2	30.2	0.78	15	1	XM_005247233.1
Select seq ref|XM_005247232.1|	PREDICTED: Homo sapiens neuroligin 1 (NLGN1), transcript variant X2, mRNA	30.2	30.2	0.78	15	1	XM_005247232.1
Select seq ref|NM_014932.3|	Homo sapiens neuroligin 1 (NLGN1), mRNA	30.2	30.2	0.78	15	1	NM_014932.3
Select seq ref|NR_024389.1|	Homo sapiens uncharacterized LOC100192386 (FLJ16779), long non-coding RNA	28.2	28.2	0.73	59	1	NR_024389.1
Select seq ref|NR_026779.1|	Homo sapiens long intergenic non-protein coding RNA 341 (LINC00341), long non-coding RNA	28.2	28.2	0.73	59	1	NR_026779.1
Select seq ref|XM_006721233.1|	PREDICTED: Homo sapiens zinc finger protein 821 (ZNF821), transcript variant X4, mRNA	26.3	26.3	0.68	233	1	XM_006721233.1
Select seq ref|XM_005254932.2|	PREDICTED: Homo sapiens furin (paired basic amino acid cleaving enzyme) (FURIN), transcript variant X2, mRNA	26.3	26.3	0.68	233	1	XM_005254932.2
Select seq ref|XM_005254931.2|	PREDICTED: Homo sapiens furin (paired basic amino acid cleaving enzyme) (FURIN), transcript variant X1, mRNA	26.3	26.3	0.68	233	1	XM_005254931.2
Select seq ref|XM_006717478.1|	PREDICTED: Homo sapiens par-3 family cell polarity regulator (PARD3), transcript variant X18, mRNA	26.3	26.3	0.68	233	1	XM_006717478.1
Select seq ref|XM_005252536.2|	PREDICTED: Homo sapiens par-3 family cell polarity regulator (PARD3), transcript variant X10, mRNA	26.3	26.3	0.68	233	1	XM_005252536.2
Select seq ref|XM_005252535.2|	PREDICTED: Homo sapiens par-3 family cell polarity regulator (PARD3), transcript variant X9, mRNA	26.3	26.3	0.68	233	1	XM_005252535.2
Select seq ref|XM_005252534.2|	PREDICTED: Homo sapiens par-3 family cell polarity regulator (PARD3), transcript variant X8, mRNA	26.3	26.3	0.68	233	1	XM_005252534.2
Select seq ref|XM_006717477.1|	PREDICTED: Homo sapiens par-3 family cell polarity regulator (PARD3), transcript variant X17, mRNA	26.3	26.3	0.68	233	1	XM_006717477.1
Select seq ref|XM_006717476.1|	PREDICTED: Homo sapiens par-3 family cell polarity regulator (PARD3), transcript variant X16, mRNA	26.3	26.3	0.68	233	1	XM_006717476.1
Select seq ref|XM_006717475.1|	PREDICTED: Homo sapiens par-3 family cell polarity regulator (PARD3), transcript variant X15, mRNA	26.3	26.3	0.68	233	1	XM_006717475.1
Select seq ref|XM_006717474.1|	PREDICTED: Homo sapiens par-3 family cell polarity regulator (PARD3), transcript variant X14, mRNA	26.3	26.3	0.68	233	1	XM_006717474.1
Select seq ref|XM_005252532.2|	PREDICTED: Homo sapiens par-3 family cell polarity regulator (PARD3), transcript variant X6, mRNA	26.3	26.3	0.68	233	1	XM_005252532.2
Select seq ref|XM_006717473.1|	PREDICTED: Homo sapiens par-3 family cell polarity regulator (PARD3), transcript variant X13, mRNA	26.3	26.3	0.68	233	1	XM_006717473.1
Select seq ref|XM_006717472.1|	PREDICTED: Homo sapiens par-3 family cell polarity regulator (PARD3), transcript variant X12, mRNA	26.3	26.3	0.68	233	1	XM_006717472.1
Select seq ref|XM_006717471.1|	PREDICTED: Homo sapiens par-3 family cell polarity regulator (PARD3), transcript variant X11, mRNA	26.3	26.3	0.68	233	1	XM_006717471.1
Select seq ref|XM_005252531.2|	PREDICTED: Homo sapiens par-3 family cell polarity regulator (PARD3), transcript variant X5, mRNA	26.3	26.3	0.68	233	1	XM_005252531.2
Select seq ref|XM_005252530.2|	PREDICTED: Homo sapiens par-3 family cell polarity regulator (PARD3), transcript variant X4, mRNA	26.3	26.3	0.68	233	1	XM_005252530.2
Select seq ref|XM_005252528.2|	PREDICTED: Homo sapiens par-3 family cell polarity regulator (PARD3), transcript variant X2, mRNA	26.3	26.3	0.68	233	1	XM_005252528.2
Select seq ref|XR_427711.1|	PREDICTED: Homo sapiens interferon regulatory factor 1 (IRF1), transcript variant X1, misc_RNA	26.3	26.3	0.68	233	1	XR_427711.1
Select seq ref|XM_006711982.1|	PREDICTED: Homo sapiens ventral anterior homeobox 2 (VAX2), transcript variant X1, mRNA	26.3	26.3	0.68	233	1	XM_006711982.1
HOXD-AS-siRNA1
Description
HOXD-AS-1
Molecule type
nucleic acid
Query Length
19
Database Name
Human G+T (2 databases)
Description
See details
Program
BLASTN 2.2.30+ Citation
Transcripts	Description	Max score	Total score	Query cover	E value	Ident	Accession
Select seq ref|NR_033979.1|	Homo sapiens HOXD cluster antisense RNA 1 (HOXD-AS1), long non-coding RNA	38.2	38.2	1	0.061	1	NR_033979.1
Select seq ref|XM_005266839.2|	PREDICTED: Homo sapiens absent in melanoma 1 (AIM1), transcript variant X1, mRNA	28.2	28.2	0.73	59	1	XM_005266839.2
Select seq ref|XM_005266197.1|	PREDICTED: Homo sapiens chromosome alignment maintaining phosphoprotein 1 (CHAMP1), transcript variant X1, mRNA	28.2	28.2	0.73	59	1	XM_005266197.1
Select seq ref|NM_001164145.1|	Homo sapiens chromosome alignment maintaining phosphoprotein 1 (CHAMP1), transcript variant 3, mRNA	28.2	28.2	0.73	59	1	NM_001164145.1
Select seq ref|NM_001164144.1|	Homo sapiens chromosome alignment maintaining phosphoprotein 1 (CHAMP1), transcript variant 2, mRNA	28.2	28.2	0.73	59	1	NM_001164144.1
Select seq ref|NM_032436.2|	Homo sapiens chromosome alignment maintaining phosphoprotein 1 (CHAMP1), transcript variant 1, mRNA	28.2	28.2	0.73	59	1	NM_032436.2
Select seq ref|NM_001624.2|	Homo sapiens absent in melanoma 1 (AIM1), mRNA	28.2	28.2	0.73	59	1	NM_001624.2
Select seq ref|XM_006723957.1|	PREDICTED: Homo sapiens adenosine deaminase, RNA-specific, B1 (ADARB1), transcript variant X5, mRNA	26.3	26.3	0.89	233	0.94	XM_006723957.1
Select seq ref|XM_006723956.1|	PREDICTED: Homo sapiens adenosine deaminase, RNA-specific, B1 (ADARB1), transcript variant X4, mRNA	26.3	26.3	0.89	233	0.94	XM_006723956.1
Select seq ref|XM_006723954.1|	PREDICTED: Homo sapiens adenosine deaminase, RNA-specific, B1 (ADARB1), transcript variant X2, mRNA	26.3	26.3	0.89	233	0.94	XM_006723954.1
Select seq ref|XM_006723953.1|	PREDICTED: Homo sapiens adenosine deaminase, RNA-specific, B1 (ADARB1), transcript variant X1, mRNA	26.3	26.3	0.89	233	0.94	XM_006723953.1
Select seq ref|XR_429652.1|	PREDICTED: Homo sapiens uncharacterized LOC102724611 (LOC102724611), ncRNA	26.3	26.3	0.68	233	1	XR_429652.1
Select seq ref|XM_006713086.1|	PREDICTED: Homo sapiens THUMP domain containing 3 (THUMPD3), transcript variant X5, mRNA	26.3	26.3	0.68	233	1	XM_006713086.1
Select seq ref|XM_005265024.2|	PREDICTED: Homo sapiens THUMP domain containing 3 (THUMPD3), transcript variant X4, mRNA	26.3	26.3	0.68	233	1	XM_005265024.2
Select seq ref|XM_005265023.2|	PREDICTED: Homo sapiens THUMP domain containing 3 (THUMPD3), transcript variant X3, mRNA	26.3	26.3	0.68	233	1	XM_005265023.2
Select seq ref|XM_005265022.2|	PREDICTED: Homo sapiens THUMP domain containing 3 (THUMPD3), transcript variant X2, mRNA	26.3	26.3	0.68	233	1	XM_005265022.2
Select seq ref|XM_005265021.2|	PREDICTED: Homo sapiens THUMP domain containing 3 (THUMPD3), transcript variant X1, mRNA	26.3	26.3	0.68	233	1	XM_005265021.2
Select seq ref|XR_424750.1|	PREDICTED: Homo sapiens uncharacterized LOC102724611 (LOC102724611), ncRNA	26.3	26.3	0.68	233	1	XR_424750.1
HOXD-AS-siRNA2
Molecule type
nucleic acid
Query Length
19
Database Name
Human G+T (2 databases)
Description
See details
Program
BLASTN 2.2.30+ Citation
Transcripts	Description	Max score	Total score	Query cover	E value	Ident	Accession
Transcripts
Select seq ref|NR_033979.1|	Homo sapiens HOXD cluster antisense RNA 1 (HOXD-AS1), long non-coding RNA	38.2	38.2	1	0.061	1	NR_033979.1
Select seq ref|NM_019079.4|	Homo sapiens LINE-1 type transposase domain containing 1 (L1TD1), transcript variant 2, mRNA	32.2	32.2	0.84	3.8	1	NM_019079.4
Select seq ref|NM_001164835.1|	Homo sapiens LINE-1 type transposase domain containing 1 (L1TD1), transcript variant 1, mRNA	32.2	32.2	0.84	3.8	1	NM_001164835.1
Select seq ref|NM_001287594.1|	Homo sapiens chloride intracellular channel 1 (CLIC1), transcript variant 3, mRNA	30.2	30.2	1	15	0.95	NM_001287594.1
Select seq ref|NM_001287593.1|	Homo sapiens chloride intracellular channel 1 (CLIC1), transcript variant 1, mRNA	30.2	30.2	1	15	0.95	NM_001287593.1
Select seq ref|NM_014732.3|	Homo sapiens KIAA0513 (KIAA0513), transcript variant 2, mRNA	30.2	30.2	0.78	15	1	NM_014732.3
Select seq ref|NM_001286566.1|	Homo sapiens KIAA0513 (KIAA0513), transcript variant 3, mRNA	30.2	30.2	0.78	15	1	NM_001286566.1
Select seq ref|NM_001286565.1|	Homo sapiens KIAA0513 (KIAA0513), transcript variant 1, mRNA	30.2	30.2	0.78	15	1	NM_001286565.1
Select seq ref|XM_005256265.1|	PREDICTED: Homo sapiens KIAA0513 (KIAA0513), transcript variant X1, mRNA	30.2	30.2	0.78	15	1	XM_005256265.1
Select seq ref|NM_001288.4|	Homo sapiens chloride intracellular channel 1 (CLIC1), transcript variant 2, mRNA	30.2	30.2	1	15	0.95	NM_001288.4
Select seq ref|XR_431346.1|	PREDICTED: Homo sapiens uncharacterized LOC102723833 (LOC102723833), ncRNA	28.2	28.2	0.73	59	1	XR_431346.1
Select seq ref|XM_006724750.1|	PREDICTED: Homo sapiens septin 6 (SEPT6), transcript variant X4, mRNA	28.2	28.2	0.73	59	1	XM_006724750.1

## Sheet: DataS10
# Supplementary DataS10: Samples Used in Figure 6
Tumor and matched normal pairs used for figure 6A
Matched_Normal	Tumor_Sample
mctp_sample_82	mctp_sample_81
mctp_sample_92	mctp_sample_91
mctp_sample_94	mctp_sample_93
Samples used for figures 6B, 6C and 6D
mctp_sample_72	tissue	lung_adenocarcinoma	cancer	LUAD
mctp_sample_73	tissue	lung_adenocarcinoma	cancer	LUAD
mctp_sample_74	tissue	lung_adenocarcinoma	cancer	LUAD
mctp_sample_75	tissue	lung_adenocarcinoma	cancer	LUAD
mctp_sample_76	tissue	lung_adenocarcinoma	cancer	LUAD
mctp_sample_77	tissue	lung_adenocarcinoma	cancer	LUAD
mctp_sample_78	tissue	lung_adenocarcinoma	cancer	LUAD
mctp_sample_79	tissue	lung_adenocarcinoma	cancer	LUAD
mctp_sample_80	tissue	lung_adenocarcinoma	cancer	LUAD
mctp_sample_81	tissue	lung_adenocarcinoma	cancer	LUAD
mctp_sample_83	tissue	lung_adenocarcinoma	cancer	LUAD
mctp_sample_84	tissue	lung_adenocarcinoma	cancer	LUAD
mctp_sample_86	tissue	lung_adenocarcinoma	cancer	LUAD
mctp_sample_87	tissue	lung_adenocarcinoma	cancer	LUAD
mctp_sample_88	tissue	lung_adenocarcinoma	cancer	LUAD
mctp_sample_90	tissue	lung_adenocarcinoma	cancer	LUAD
mctp_sample_91	tissue	lung_adenocarcinoma	cancer	LUAD
mctp_sample_93	tissue	lung_adenocarcinoma	cancer	LUAD
mctp_sample_95	tissue	lung_adenocarcinoma	cancer	LUAD
mctp_sample_96	tissue	lung_adenocarcinoma	cancer	LUAD
mctp_sample_97	tissue	lung_adenocarcinoma	cancer	LUAD
mctp_sample_98	tissue	lung_adenocarcinoma	cancer	LUAD
mctp_sample_99	tissue	lung_adenocarcinoma	cancer	LUAD
mctp_sample_100	tissue	lung_adenocarcinoma	cancer	LUAD
mctp_sample_101	tissue	lung_adenocarcinoma	cancer	LUAD
mctp_sample_102	tissue	lung_adenocarcinoma	cancer	LUAD
mctp_sample_104	tissue	lung_adenocarcinoma	cancer	LUAD
mctp_sample_105	tissue	lung_adenocarcinoma	cancer	LUAD
mctp_sample_106	tissue	lung_adenocarcinoma	cancer	LUAD
mctp_sample_107	tissue	lung_adenocarcinoma	cancer	LUAD
mctp_sample_108	tissue	lung_adenocarcinoma	cancer	LUAD
mctp_sample_109	tissue	lung_adenocarcinoma	cancer	LUAD
mctp_sample_110	tissue	lung_adenocarcinoma	cancer	LUAD
mctp_sample_111	tissue	lung_adenocarcinoma	cancer	LUAD
mctp_sample_112	tissue	lung_adenocarcinoma	cancer	LUAD
mctp_sample_113	tissue	lung_adenocarcinoma	cancer	LUAD
mctp_sample_114	tissue	lung_adenocarcinoma	cancer	LUAD
mctp_sample_115	tissue	lung_adenocarcinoma	cancer	LUAD
mctp_sample_116	tissue	lung_adenocarcinoma	cancer	LUAD
mctp_sample_117	tissue	lung_adenocarcinoma	cancer	LUAD
mctp_sample_118	tissue	lung_adenocarcinoma	cancer	LUAD
mctp_sample_119	tissue	lung_adenocarcinoma	cancer	LUAD
mctp_sample_120	tissue	lung_adenocarcinoma	cancer	LUAD
mctp_sample_121	tissue	lung_adenocarcinoma	cancer	LUAD
mctp_sample_122	tissue	lung_adenocarcinoma	cancer	LUAD
mctp_sample_123	tissue	lung_adenocarcinoma	cancer	LUAD
mctp_sample_124	tissue	lung_adenocarcinoma	cancer	LUAD
mctp_sample_125	tissue	lung_adenocarcinoma	cancer	LUAD
mctp_sample_126	tissue	lung_adenocarcinoma	cancer	LUAD
mctp_sample_127	tissue	lung_adenocarcinoma	cancer	LUAD
mctp_sample_128	tissue	lung_adenocarcinoma	cancer	LUAD
mctp_sample_129	tissue	lung_adenocarcinoma	cancer	LUAD
mctp_sample_130	tissue	lung_adenocarcinoma	cancer	LUAD
mctp_sample_131	tissue	lung_adenocarcinoma	cancer	LUAD
mctp_sample_132	tissue	lung_adenocarcinoma	cancer	LUAD
mctp_sample_133	tissue	lung_adenocarcinoma	cancer	LUAD
mctp_sample_134	tissue	lung_adenocarcinoma	cancer	LUAD
mctp_sample_135	tissue	lung_adenocarcinoma	cancer	LUAD
mctp_sample_136	tissue	lung_adenocarcinoma	cancer	LUAD
mctp_sample_137	tissue	lung_adenocarcinoma	cancer	LUAD
mctp_sample_138	tissue	lung_adenocarcinoma	cancer	LUAD
mctp_sample_139	tissue	lung_adenocarcinoma	cancer	LUAD
mctp_sample_140	tissue	lung_adenocarcinoma	cancer	LUAD
mctp_sample_141	tissue	lung_adenocarcinoma	cancer	LUAD
mctp_sample_103	tissue	lung_squamous_carcinoma	cancer	LUSC
mctp_sample_169	tissue	lung_adenocarcinoma	cancer	LUAD
mctp_sample_82	tissue	benign	benign	BENIGN
mctp_sample_92	tissue	benign	benign	BENIGN
mctp_sample_94	tissue	benign	benign	BENIGN

[truncated: 6 more sheets: DataS11_HTH-cisNAT, DataS12_TTT-cisNAT, DataS13_EMB-cisNAT, DataS14_cis-NAT_Misannotated, DataS15_actionable_notoverlap, DataS16_CancerRelatedGenes]
